# Supplementary material
Source: Royal Society of Chemistry journal article supplement (doi:10.1039/d6cc01689h)
Supplement: d6cc01689h1.pdf [file d6cc01689h1.pdf]

# Organocatalytic asymmetric [4 + 4]-annulation reaction between ynones and benzylidene thiazolones: Synthesis of eight-membered ether containing 4,5-fused thiazoles

Dipankar Barman, Subhas Chandra Pan \*

Department of Chemistry, Indian Institute of Technology Guwahati, Assam, India, 781039 Fax: (+91)-361-258-2349; phone: (+91)-361-258-3304; email: [span@iitg.ac.in](mailto:span@iitg.ac.in)

## Table of contents

|                                                                         |     |
|-------------------------------------------------------------------------|-----|
| 1. General information                                                  | S1  |
| 2. Preparation of starting materials                                    | S1  |
| 3. Catalyst & solvent optimization                                      | S2  |
| 4. General procedure for the enantioselective [4+4]-annulation reaction | S3  |
| 5. Synthetic transformations                                            | S3  |
| 6. References                                                           | S5  |
| 7. Characterization of products                                         | S6  |
| 8. Scale-up reaction for compound 3aa                                   | S26 |
| 9. Single crystal X-ray diffraction analysis                            | S26 |
| 10. <sup>1</sup> H NMR and <sup>13</sup> C NMR spectra                  | S28 |
| 11. HPLC chromatogram                                                   | S70 |

## **1. General information:**

Unless otherwise noted, all reagents and solvents were purchased from the commercial sources and used as received. All dry solvents were dried using activated 4Å molecular sieves and stored under argon. Flash chromatography was performed using Merck silica gel60 with freshly distilled solvents. Columns were typically packed as slurry and equilibrated with the appropriate solvent system prior to use. <sup>1</sup>H NMR spectra were recorded on 400 MHz, 500 MHz and 600 MHz spectrometer, respectively (CDCl<sub>3</sub> as solvent). <sup>13</sup>C NMR spectra were recorded on 100 MHz, 125 MHz and 150 MHz. Chemical shifts were reported in parts per million (ppm), and the residual solvent peak was used as an internal reference: proton (chloroform δ 7.260), carbon (chloroform δ 77.23). Multiplicity was indicated as follows: s = singlet, d = doublet, dd = double doublet, ddd = doublet of doublet of doublets, t = triplet, q = quartet, dt = doublet of triplets, m = multiplet, bs = broad singlet. The number of protons (n) for a given resonance is indicated by nH. Coupling constants were reported as a J value in Hertz (Hz). Using ESI positive mode HRMS spectra were recorded. Enantiomeric ratios were determined by HPLC analysis performed on Chiral Columns using Daicel Chiral PAK IA and ID Columns. For visualizing the products UV light was used. Silica gel. Reactions were monitored by TLC on silica gel 60 with fluorescence indicator F254 (0.25 mm).

## **2. Preparation of starting materials:**

### **2.1 Methods for the preparation of 5-alkenyl thiazolone 1**

All 5-alkenyl thiazolone derivatives were prepared using the reported procedure from the previous literature.<sup>[1]</sup> The spectra are in accordance with literature.

### **2.2 Methods for the preparation of ynones 2**

All ynones were prepared using the reported procedure from the corresponding phenyl acetylenes and phenyl acetic acids.<sup>[2,3]</sup>

### 3. Catalyst & solvent optimization:

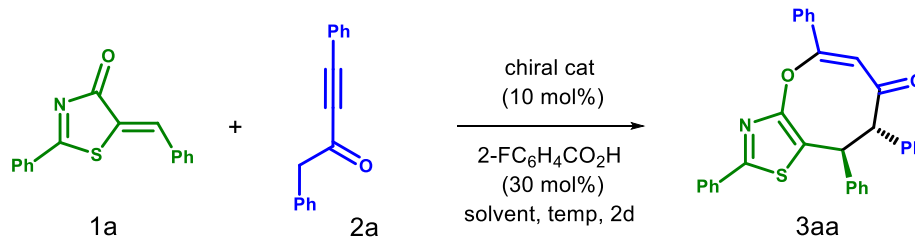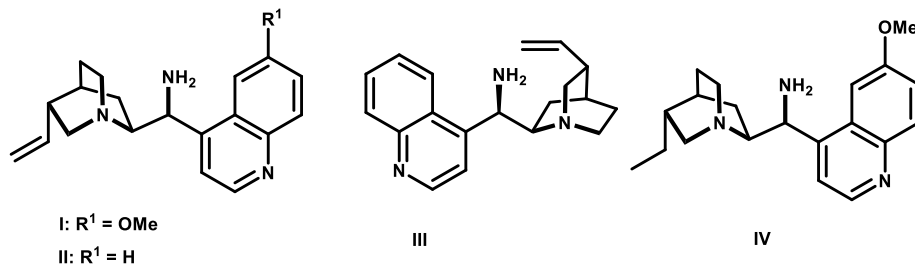

| entry <sup>a</sup> | Catalyst (10 mol%) | Solvent             | <i>T</i> (°C) | Yield (%) <sup>b</sup> | ee (%) <sup>c</sup> |
|--------------------|--------------------|---------------------|---------------|------------------------|---------------------|
| 1                  | <b>I</b>           | toluene             | 45            | 55                     | 86                  |
| 2                  | <b>II</b>          | toluene             | 45            | 65                     | 90                  |
| 3                  | <b>III</b>         | toluene             | 45            | 58                     | 57                  |
| 4                  | <b>IV</b>          | toluene             | 45            | 50                     | 88                  |
| 5                  | <b>II</b>          | EtOAc               | 45            | 68                     | 84                  |
| 6                  | <b>II</b>          | CH <sub>3</sub> CN  | 45            | 80                     | 81                  |
| 7                  | <b>II</b>          | (CHCl) <sub>2</sub> | 45            | 85                     | 56                  |
| 8 <sup>d</sup>     | <b>II</b>          | toluene             | 60            | 78                     | 82                  |
| 9 <sup>d</sup>     | <b>II</b>          | toluene             | 80            | 58                     | 75                  |
| 10 <sup>e</sup>    | <b>II</b>          | toluene             | 45            | 60                     | 93                  |
| 11 <sup>f</sup>    | <b>II</b>          | toluene             | -             | 68                     | 72                  |

<sup>a</sup>Unless specified, 0.075 mmol of **1a** and 0.05 mmol of **2a** were stirred in 0.5 mL toluene with 10 mol% chiral amine catalyst, 30 mol% 2-FC<sub>6</sub>H<sub>4</sub>COOH at 45 °C for 2 days. <sup>b</sup>Isolated yield after silica gel column chromatography for the single diastereomer. <sup>c</sup>Determined by HPLC. <sup>d</sup>Reaction time 12h. <sup>e</sup>Reaction was run in 1 mL toluene. <sup>f</sup>Reaction was performed at rt for 12 days.

#### 4. General procedure for the enantioselective [4+4]-annulation reaction

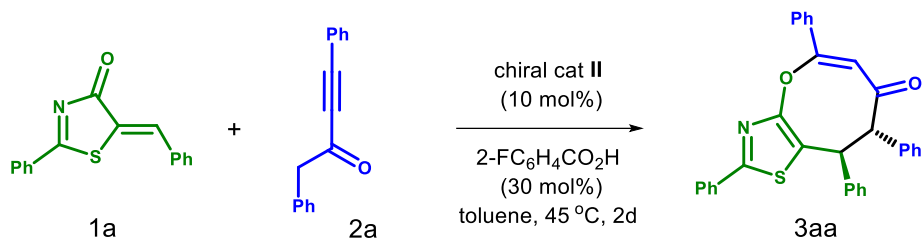

Under an argon atmosphere, an oven dried round bottom flask was charged with cat II (3.39 mg, 10 mol %), 2-FC<sub>6</sub>H<sub>4</sub>COOH (3.66 mg, 30 mol %). After the flask was evacuated and backfilled with argon, dry toluene (2.0 mL) was added, then stirred at rt for 30 minutes. Then 5-alkenyl thiazolones 1a (0.15 mmol, 1.5 equiv) and ynones 2a (0.1 mmol, 1 equiv) were added sequentially. The reaction mixture was stirred at 45 °C for 2 days. After the completion of reaction, mixture was directly purified by flash column chromatography on silica gel with hexane/ethyl acetate (3%) to afford desired product 3aa.

#### 5. Synthetic transformations

##### ➤ 5.1 General procedure for the synthesis of compound 4<sup>[4]</sup>

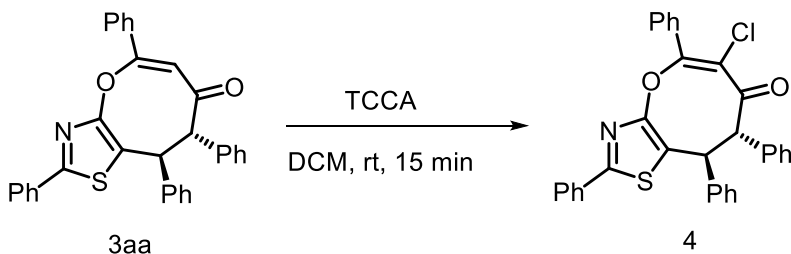

In an oven dried 5 mL vial, 2a (48.5 mg, 0.1 mmol, 1eq) was taken in 0.5 ml DCM. In that resulting solution, trichloroisocyanuric acid (TCCA) (0.1mmol, 1.0 equiv) was added and stirred at room temperature until 2a fully consumed. At the end of the reaction, the solvent was removed in vacuum. The residue was purified by flash column chromatography with (gradient eluent of EtOAc/petroleum ether: 95/5) to afford product 4 as white solid (38.5 mg, 74% yield, >20:1 dr, 88% ee).

➤ 5.2 General procedure for the synthesis of compound **5** <sup>[3]</sup>

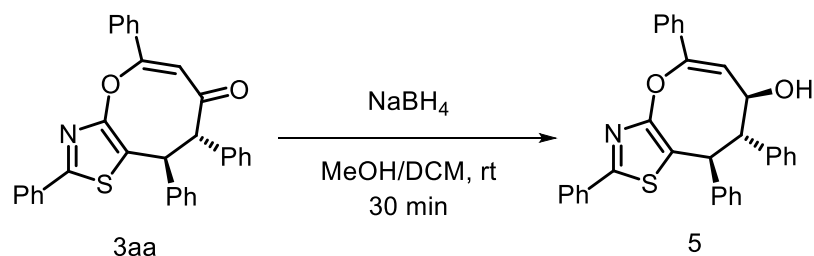

To 0.5 mL of methanol and 0.5 mL of DCM was added compound **3aa** (48.5 mg, 0.1 mmol), followed by sodium borohydride (0.5 mmol, 5 equiv) in portion wise at 0 °C, and the reaction mixture was stirred for 30 min at rt. The TLC was checked, and the reaction showed full conversion. After complete consumption of **3aa**, H<sub>2</sub>O (5 mL) was added dropwise. The resulting mixture was diluted with 5 mL of DCM. The organic layer was separated, and the aqueous layer was extracted with DCM (3 × 5 mL). Combined organic layer was washed with brine (3 × 5 mL), dried over anhydrous Na<sub>2</sub>SO<sub>4</sub> and concentrated under reduced pressure. The residue was purified by flash column chromatography (petroleum ether: ethyl acetate = 90:10) to give product **5** as white solid (42.9 mg, 88% yield, >20:1 dr, 82% ee).

➤ 5.3 General procedure for the synthesis of compound **6** <sup>[2]</sup>

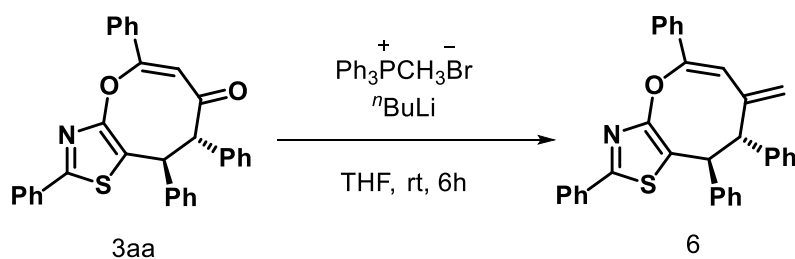

To a solution of methyltriphenylphosphoniumbromide (71.4 mg, 0.2 mmol, 2.0 equiv.) in THF (5 mL) under Ar atmosphere, n-butyllithium (0.2 mL, 1.6M, 0.2 mmol, 2.0 equiv.) was added dropwise at 0 °C. The reaction mixture was stirred for 1 h at room temperature. Then **3aa** (48.5 mg, 0.1 mmol, 1.0 equiv.) was added and the reaction was stirred for 6 h at room temperature and quenched with saturated NH<sub>4</sub>Cl aqueous solution. The solvent was removed in vacuo and the resulting mixture was extracted with diethyl ether. The combined organic layer was washed with brine and dried over anhydrous sodium sulphate. Evaporation of the solvent followed by purification by flash chromatography on silica gel (Hexane/ethyl acetate = 100:1) gave the pure compound **6** (34.9 mg, 72% yield, >20:1 dr, 94% ee).

## 6. References

1. A. Manna, S. Rohilla, V. K. Singh, *Org. Lett.* **2024**, *26*, *1*, 280-285.
2. D. Barman, S. C. Pan, *Org. Lett.* **2025**, *27*, *21*, 5338-5342.
3. R. Khuntia, S. K. Mahapatra, S. C. Pan, *Chem. Sci.* **2023**, *14*, 10768-10776.
4. G. Jaiswal, S. C. Pan, *Org. Biomol. Chem.* **2024**, *22*, 3602-3605.

## 7. Characterization of products

### (8S,9S, Z)-2,5,8,9-tetraphenyl-8,9-dihydro-7H-oxocino[2,3-d]thiazol-7-one (3aa)

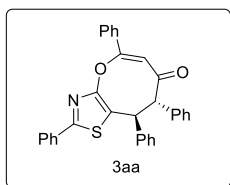

Prepared according to the general procedure using 5-alkenyl thiazolone **1a** (0.15mmol, 1.5 equiv), ynone **2a** (0.1 mmol, 1 equiv), catalyst **II** (10 mol%), 2-FC<sub>6</sub>H<sub>4</sub>COOH (30 mol%) and dry toluene (2 mL). The product **3aa** was obtained after column chromatography (hexane/EtOAc =33:1) as a white solid. **m.p.** 208-210 °C. **Yield** = 60% (29.1 mg), **d.r.** = 20:1, **ee** = 93%.

**<sup>1</sup>H NMR** (400 MHz, CDCl<sub>3</sub>) δ 8.30 – 8.25 (m, 2H), 7.92 – 7.87 (m, 2H), 7.67 – 7.62 (m, 3H), 7.53 – 7.48 (m, 2H), 7.45 (p, *J* = 2.8 Hz, 3H), 7.32 – 7.26 (m, 3H), 7.26 – 7.21 (m, 3H), 7.20 – 7.16 (m, 1H), 6.33 (s, 1H), 5.64 (d, *J* = 12.1 Hz, 1H), 4.80 (d, *J* = 12.3 Hz, 1H).

**<sup>13</sup>C NMR** (101 MHz, CDCl<sub>3</sub>) δ 201.8, 167.9, 163.0, 159.2, 141.6, 137.0, 133.6, 132.9, 131.7, 130.7, 129.8, 129.0, 128.7, 128.3, 128.2, 127.9, 127.6, 127.4, 126.0, 124.9, 114.1, 60.4, 47.8.

**HRMS (ESI-TOF) m/z:** [M+H]<sup>+</sup>calculated for C<sub>32</sub>H<sub>24</sub>NO<sub>2</sub>S: 486.1523, found 486.1527.

**HPLC Analysis:** The enantiomeric excess was determined using ChiralPAK ADH Column, *n*-Hexane/*i*-PrOH = 90/10, flow rate 1.0 mL/min, λ = 220 nm (*t*<sub>major</sub> = 19.77 min, *t*<sub>minor</sub> = 16.1 min).

### (8S,9S, Z)-2,5,8-triphenyl-9-(*p*-tolyl)-8,9-dihydro-7H-oxocino[2,3-d]thiazol-7-one (3ba)

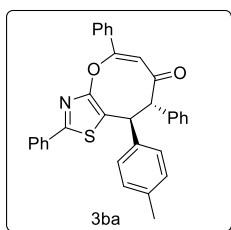

Prepared according to the general procedure using 5-alkenyl thiazolone **1b** (0.15mmol, 1.5 equiv), ynone **2a** (0.1 mmol, 1 equiv), catalyst **II** (10 mol%), 2-FC<sub>6</sub>H<sub>4</sub>COOH (30 mol%) and dry toluene (2 mL). The product **3ba** was obtained after column chromatography (hexane/EtOAc =33:1) as a white solid. **m.p.** 196-198 °C. **Yield** = 75% (37.5 mg), **d.r.** = 20:1, **ee** = 86%.

**<sup>1</sup>H NMR** (500 MHz, CDCl<sub>3</sub>) δ 8.18 (d, *J* = 6.3 Hz, 2H), 7.80 (d, *J* = 7.8 Hz, 2H), 7.59 – 7.50 (m, 3H), 7.46 – 7.33 (m, 5H), 7.20 (td, *J* = 14.9, 7.1 Hz, 4H), 7.05 (d, *J* = 8.0 Hz, 2H), 6.92 (d, *J* = 8.2 Hz, 2H), 6.22 (s, 1H), 5.53 (d, *J* = 12.2 Hz, 1H), 4.68 (d, *J* = 12.2 Hz, 1H), 2.18 (s, 3H).

**<sup>13</sup>C NMR** (126 MHz, CDCl<sub>3</sub>) δ 201.9, 167.8, 162.9, 159.1, 138.6, 137.2, 137.0, 133.7, 133.0, 131.6, 130.6, 129.9, 129.4, 129.0, 128.3, 128.2, 127.7, 127.5, 126.0, 125.2, 114.0, 60.4, 47.3, 21.2.

**HRMS (ESI-TOF) m/z:** [M+H]<sup>+</sup>calculated for C<sub>33</sub>H<sub>26</sub>NO<sub>2</sub>S: 500.1679, found 500.1693.

**HPLC Analysis:** The enantiomeric excess was determined using ChiralPAK ADH Column, *n*-Hexane/*i*-PrOH = 90/10, flow rate 1.0 mL/min, λ = 220 nm (*t*<sub>major</sub> = 18.0 min, *t*<sub>minor</sub> = 13.1 min).

**(8S,9S, Z)-9-(4-methoxyphenyl)-2,5,8-triphenyl-8,9-dihydro-7H-oxocino[2,3-d]thiazol-7-one (3ca)**

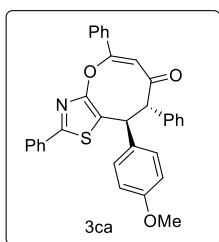

Prepared according to the general procedure using 5-alkenyl thiazolone **1c** (0.15mmol, 1.5 equiv), ynone **2a** (0.1 mmol, 1 equiv), catalyst **II** (10 mol%), 2-FC<sub>6</sub>H<sub>4</sub>COOH (30 mol%) and dry toluene (2 mL). The product **3ca** was obtained after column chromatography (hexane/EtOAc =33:1) as a white solid. **m.p.** 190-192 °C. **Yield** = 77% (39.7 mg), **d.r.** = 20:1, **ee** = 86%.

**<sup>1</sup>H NMR** (400 MHz, CDCl<sub>3</sub>) δ 8.15 – 8.03 (m, 2H), 7.77 – 7.67 (m, 2H), 7.52 – 7.45 (m, 3H), 7.37 – 7.25 (m, 5H), 7.18 – 7.07 (m, 3H), 7.04 – 6.97 (m, 2H), 6.63 – 6.53 (m, 2H), 6.15 (s, 1H), 5.43 (d, *J* = 12.3 Hz, 1H), 4.60 (d, *J* = 12.3 Hz, 1H), 3.59 (s, 3H).

**<sup>13</sup>C NMR** (101 MHz, CDCl<sub>3</sub>) δ 201.9, 167.8, 162.9, 159.1, 158.7, 137.2, 133.7, 133.6, 133.0, 131.6, 130.6, 129.9, 129.0, 128.9, 128.3, 128.1, 127.5, 126.0, 125.3, 114.0, 114.0, 60.6, 55.2, 47.0.

**HRMS (ESI-TOF) m/z:** [M+H]<sup>+</sup>calculated for C<sub>33</sub>H<sub>26</sub>NO<sub>3</sub>S: 516.1628, found 516.1644.

**HPLC Analysis:** The enantiomeric excess was determined using ChiralPAK IA Column, *n-Hexane/i-PrOH* = 90/10, flow rate 1.0 mL/min, λ = 220 nm (*t*<sub>major</sub> = 20.69 min, *t*<sub>minor</sub> = 25.48 min).

**(8S,9S, Z)-9-(4-fluorophenyl)-2,5,8-triphenyl-8,9-dihydro-7H-oxocino[2,3-d]thiazol-7-one (3da)**

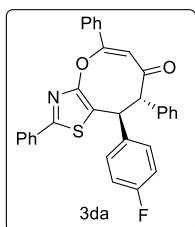

Prepared according to the general procedure using 5-alkenyl thiazolone **1d** (0.15mmol, 1.5 equiv), ynone **2a** (0.1 mmol, 1 equiv), catalyst **II** (10 mol%), 2-FC<sub>6</sub>H<sub>4</sub>COOH (30 mol%) and dry toluene (2 mL). The product **3da** was obtained after column chromatography (hexane/EtOAc =33:1) as a white solid. **m.p.** 204-206 °C.

**Yield** = 72% (36.2 mg), **d.r.** = 20:1, **ee** = 82%.

**<sup>1</sup>H NMR** (500 MHz, CDCl<sub>3</sub>) δ 8.09 – 8.02 (m, 2H), 7.68 (d, *J* = 7.5 Hz, 2H), 7.46 – 7.40 (m, 3H), 7.26 (d, *J* = 17.1 Hz, 6H), 7.09 (td, *J* = 12.8, 12.1, 6.4 Hz, 4H), 6.98 (t, *J* = 7.0 Hz, 2H), 6.69 (t, *J* = 8.5 Hz, 2H), 6.11 (s, 1H), 5.35 (d, *J* = 12.1 Hz, 1H), 4.55 (d, *J* = 12.2 Hz, 1H).

**<sup>13</sup>C NMR** (126 MHz, CDCl<sub>3</sub>) δ 201.6, 167.9, 163.3, 163.0, 161.0, 159.3, 137.4, 137.4, 136.9, 133.5, 132.9, 131.8, 130.8, 129.9, 129.5, 129.4, 129.1, 129.1, 128.4, 128.2, 127.7, 126.1, 124.6, 115.7, 115.5, 114.2, 60.6, 47.2.

**HRMS (ESI-TOF) m/z:** [M+H]<sup>+</sup>calculated for C<sub>32</sub>H<sub>23</sub>FNO<sub>2</sub>S: 504.1429, found 504.1454.

**HPLC Analysis:** The enantiomeric excess was determined using ChiralPAK ADH Column, *n-Hexane/i-PrOH* = 90/10, flow rate 1.0 mL/min, λ = 220 nm (*t*<sub>major</sub> = 26.93 min, *t*<sub>minor</sub> = 21.3 min).

**(8S,9S, Z)-9-(4-chlorophenyl)-2,5,8-triphenyl-8,9-dihydro-7H-oxocino[2,3-d]thiazol-7-one (3ea)**

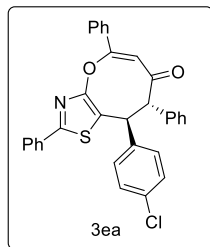

Prepared according to the general procedure using 5-alkenyl thiazolone **1e** (0.15mmol, 1.5 equiv), ynone **2a** (0.1 mmol, 1 equiv), catalyst **II** (10 mol%), 2-FC<sub>6</sub>H<sub>4</sub>COOH (30 mol%) and dry toluene (2 mL). The product **3ea** was obtained after column chromatography (hexane/EtOAc =33:1) as a white solid. **m.p.** 188-190 °C.

**Yield** = 62% (32.2 mg), **d.r.** = 20:1, **ee** = 82%.

**<sup>1</sup>H NMR** (500 MHz, CDCl<sub>3</sub>) δ 8.19 (dd, *J* = 6.5, 3.1 Hz, 2H), 7.83 (d, *J* = 7.0 Hz, 2H), 7.60 – 7.54 (m, 3H), 7.41 (d, *J* = 7.2 Hz, 5H), 7.24 (td, *J* = 13.1, 11.8, 4.9 Hz, 4H), 7.11 (q, *J* = 4.8, 3.2 Hz, 4H), 6.25 (s, 1H), 5.49 (d, *J* = 12.1 Hz, 1H), 4.69 (d, *J* = 12.1 Hz, 1H).

**<sup>13</sup>C NMR** (126 MHz, CDCl<sub>3</sub>) δ 201.5, 168.0, 163.3, 159.4, 140.2, 136.8, 133.5, 133.2, 132.9, 131.8, 130.8, 129.8, 129.3, 129.1, 129.1, 128.9, 128.5, 128.2, 127.8, 126.1, 124.2, 114.2, 60.3, 47.3.

**HRMS (ESI-TOF) m/z:** [M+H]<sup>+</sup>calculated for C<sub>32</sub>H<sub>23</sub>ClNO<sub>2</sub>S: 520.1133, found 520.1134.

**HPLC Analysis:** The enantiomeric excess was determined using ChiralPAK ADH Column, *n*-Hexane/*i*-PrOH = 90/10, flow rate 1.0 mL/min, λ = 220 nm (*t*<sub>major</sub> = 27.56 min, *t*<sub>minor</sub> = 18.73 min).

**(8S,9S,Z)-9-(4-bromophenyl)-2,5,8-triphenyl-8,9-dihydro-7H-oxocino[2,3-d]thiazol-7-one (3fa)**

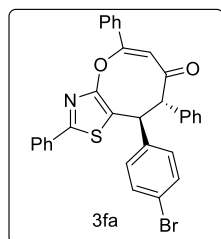

Prepared according to the general procedure using 5-alkenyl thiazolone **1f** (0.15mmol, 1.5 equiv), ynone **2a** (0.1 mmol, 1 equiv), catalyst **II** (10 mol%), 2-FC<sub>6</sub>H<sub>4</sub>COOH (30 mol%) and dry toluene (2 mL). The product **3ba** was obtained after column chromatography (hexane/EtOAc =33:1) as a white solid. **m.p.** 195-197 °C.

**Yield** = 60% (33.8 mg), **d.r.** = 20:1, **ee** = 96%.

**<sup>1</sup>H NMR** (500 MHz, CDCl<sub>3</sub>) δ 8.05 (dq, *J* = 7.6, 4.1, 3.2 Hz, 2H), 7.68 (dd, *J* = 7.7, 1.9 Hz, 2H), 7.46 – 7.41 (m, 3H), 7.26 (d, *J* = 12.8 Hz, 6H), 7.14 – 7.06 (m, 6H), 6.91 – 6.86 (m, 2H), 6.12 – 6.08 (m, 1H), 5.37 – 5.32 (m, 1H), 4.55 – 4.50 (m, 1H).

**<sup>13</sup>C NMR** (126 MHz, CDCl<sub>3</sub>) δ 201.5, 168.0, 163.4, 159.4, 140.7, 136.8, 133.5, 132.9, 131.9, 131.8, 130.9, 129.9, 129.6, 129.1, 129.1, 128.5, 128.2, 127.8, 126.1, 124.2, 121.4, 114.2, 60.3, 47.4.

**HRMS (ESI-TOF) m/z:** [M+H]<sup>+</sup>calculated for C<sub>32</sub>H<sub>23</sub>BrNO<sub>2</sub>S: 564.0628, found 564.0634.

**HPLC Analysis:** The enantiomeric excess was determined using ChiralPAK IA Column, *n*-Hexane/*i*-PrOH = 90/10, flow rate 1.0 mL/min, λ = 220 nm (*t*<sub>major</sub> = 21.8 min, *t*<sub>minor</sub> = 9.68 min).

**(8S,9S,Z)-2,5,8-triphenyl-9-(*m*-tolyl)-8,9-dihydro-7H-oxocino[2,3-d]thiazol-7-one (3ga)**

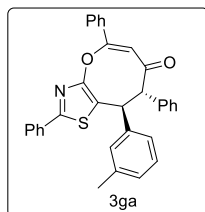

Prepared according to the general procedure using 5-alkenyl thiazolone **1g** (0.15mmol, 1.5 equiv), ynone **2a** (0.1 mmol, 1 equiv), catalyst **II** (10 mol%), 2-FC<sub>6</sub>H<sub>4</sub>COOH (30 mol%) and dry toluene (2 mL). The product **3ga** was obtained after column

chromatography (hexane/EtOAc =33:1) as a white solid. **m.p.** 196-198 °C. **Yield** = 75% (37.5 mg), **d.r.** = 20:1, **ee** = 84%.

**<sup>1</sup>H NMR** (400 MHz, CDCl<sub>3</sub>) δ 8.14 – 8.07 (m, 2H), 7.77 – 7.69 (m, 2H), 7.53 – 7.43 (m, 3H), 7.36 – 7.32 (m, 2H), 7.29 (dd, *J* = 5.1, 2.1 Hz, 3H), 7.17 – 7.08 (m, 3H), 6.96 – 6.84 (m, 3H), 6.81 (d, *J* = 7.5 Hz, 1H), 6.15 (s, 1H), 5.46 (d, *J* = 12.3 Hz, 1H), 4.60 (d, *J* = 12.3 Hz, 1H), 2.11 (s, 3H).

**<sup>13</sup>C NMR** (101 MHz, CDCl<sub>3</sub>) δ 201.9, 167.8, 162.9, 159.2, 141.5, 138.4, 137.1, 133.0, 131.7, 130.7, 129.9, 129.1, 128.5, 128.5, 128.2, 128.2, 128.2, 127.5, 126.0, 125.1, 125.1, 114.1, 60.3, 47.7, 21.6.

**HRMS (ESI-TOF) m/z:** [M+H]<sup>+</sup>calculated for C<sub>33</sub>H<sub>26</sub>BrNO<sub>2</sub>S: 500.1679, found 500.1667.

**HPLC Analysis:** The enantiomeric excess was determined using ChiralPAK ADH Column, *n*-Hexane/*i*-PrOH = 90/10, flow rate 1.0 mL/min, λ = 220 nm (*t*<sub>major</sub> = 15.32 min, *t*<sub>minor</sub> = 9.3 min).

**(8*S*,9*S*,*Z*)-9-(3-fluorophenyl)-2,5,8-triphenyl-8,9-dihydro-7*H*-oxocino[2,3-*d*]thiazol-7-one (3ha)**

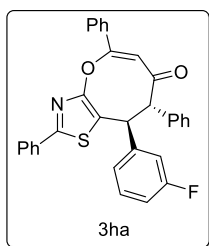

Prepared according to the general procedure using 5-alkenyl thiazolone **1h** (0.15mmol, 1.5 equiv), ynone **2a** (0.1 mmol, 1 equiv), catalyst **II** (10 mol%), 2-FC<sub>6</sub>H<sub>4</sub>COOH (30 mol%) and dry toluene (2 mL). The product **3ha** was obtained after column chromatography (hexane/EtOAc =33:1) as a white solid. **m.p.** 228-230 °C.

**Yield** = 68% (34.2 mg), **d.r.** = 20:1, **ee** = 80%.

**<sup>1</sup>H NMR** (400 MHz, CDCl<sub>3</sub>) δ 8.24 – 8.17 (m, 2H), 7.82 (dd, *J* = 7.6, 2.1 Hz, 2H), 7.61 – 7.55 (m, 3H), 7.46 – 7.41 (m, 2H), 7.38 (d, *J* = 7.0 Hz, 3H), 7.24 (dt, *J* = 10.1, 6.6 Hz, 4H), 7.10 (td, *J* = 8.1, 5.8 Hz, 1H), 6.93 (ddd, *J* = 7.8, 4.1, 1.7 Hz, 2H), 6.80 (td, *J* = 8.3, 2.8 Hz, 1H), 6.27 (s, 1H), 5.54 (d, *J* = 12.1 Hz, 1H), 4.72 (d, *J* = 12.3 Hz, 1H).

**<sup>13</sup>C NMR** (101 MHz, CDCl<sub>3</sub>) δ 201.4, 168.0, 164.1, 163.3, 161.7, 159.3, 144.1, 144.0, 136.7, 133.5, 132.9, 131.8, 130.8, 130.2, 130.1, 129.8, 129.1, 128.4, 128.2, 127.8, 126.0, 124.1, 123.7, 123.7, 114.9, 114.7, 114.6, 114.4, 114.2, 60.1, 47.5, 47.5.

**HRMS (ESI-TOF) m/z:** [M+H]<sup>+</sup>calculated for C<sub>32</sub>H<sub>23</sub>FNO<sub>2</sub>S: 504.1429, found 504.1457.

**HPLC Analysis:** The enantiomeric excess was determined using ChiralPAK ADH Column, *n*-Hexane/*i*-PrOH = 90/10, flow rate 1.0 mL/min, λ = 220 nm (*t*<sub>major</sub> = 26.3 min, *t*<sub>minor</sub> = 13.96 min).

**(8*S*,9*S*,*Z*)-9-(3-chlorophenyl)-2,5,8-triphenyl-8,9-dihydro-7*H*-oxocino[2,3-*d*]thiazol-7-one (3ia)**

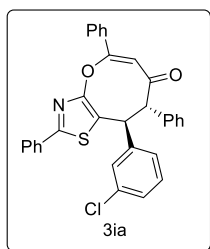

Prepared according to the general procedure using 5-alkenyl thiazolone **1i** (0.15mmol, 1.5 equiv), ynone **2a** (0.1 mmol, 1 equiv), catalyst **II** (10 mol%), 2-FC<sub>6</sub>H<sub>4</sub>COOH (30 mol%) and dry toluene (2 mL). The product **3ia** was obtained after column chromatography (hexane/EtOAc =33:1) as a white solid. **m.p.** 221-223 °C.

**Yield** = 70% (36.4 mg), **d.r.** = 20:1, **ee** = 82%.

**<sup>1</sup>H NMR** (500 MHz, CDCl<sub>3</sub>) δ 8.26 (d, *J* = 5.5 Hz, 2H), 7.88 (d, *J* = 7.6 Hz, 2H), 7.64 (s, 3H), 7.47 (q, *J* = 8.0 Hz, 5H), 7.34 – 7.23 (m, 5H), 7.10 (dd, *J* = 22.1, 8.9 Hz, 3H), 6.31 (d, *J* = 2.5 Hz, 1H), 5.61 – 5.52 (m, 1H), 4.78 – 4.70 (m, 1H).

**<sup>13</sup>C NMR** (126 MHz, CDCl<sub>3</sub>) δ 201.4, 168.0, 163.4, 159.4, 143.6, 136.7, 134.6, 133.5, 132.9, 131.8, 130.8, 129.9, 129.9, 129.1, 128.5, 128.2, 128.0, 127.8, 127.7, 126.3, 126.1, 123.9, 114.2, 60.2, 47.5.

**HRMS (ESI-TOF) m/z:** [M+H]<sup>+</sup>calculated for C<sub>32</sub>H<sub>23</sub>ClNO<sub>2</sub>S: 520.1133, found 520.1147.

**HPLC Analysis:** The enantiomeric excess was determined using ChiralPAK ADH Column, *n*-Hexane/*i*-PrOH = 90/10, flow rate 1.0 mL/min, λ = 220 nm (*t*<sub>major</sub> = 23.07 min, *t*<sub>minor</sub> = 11.68 min).

**(8*S*,9*S*, *Z*)-9-(3-bromophenyl)-2,5,8-triphenyl-8,9-dihydro-7H-oxocino[2,3-*d*]thiazol-7-one (3ja)**

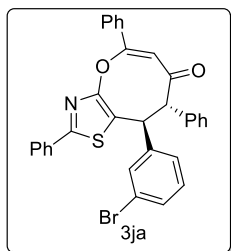

Prepared according to the general procedure using 5-alkenyl thiazolone **1j** (0.15mmol, 1.5 equiv), ynone **2a** (0.1 mmol, 1 equiv), catalyst **II** (10 mol%), 2-FC<sub>6</sub>H<sub>4</sub>COOH (30 mol%) and dry toluene (2 mL). The product **3ja** was obtained after column chromatography (hexane/EtOAc =33:1) as a white solid. **m.p.** 220-222 °C.

**Yield** = 63% (35.28 mg), **d.r.** = 20:1, **ee** = 82%.

**<sup>1</sup>H NMR** (400 MHz, CDCl<sub>3</sub>) δ 8.08 (dd, *J* = 6.7, 2.9 Hz, 2H), 7.79 – 7.66 (m, 2H), 7.53 – 7.41 (m, 3H), 7.29 (q, *J* = 6.6 Hz, 5H), 7.20 (s, 1H), 7.12 (dt, *J* = 10.3, 6.0 Hz, 4H), 6.98 – 6.82 (m, 2H), 6.14 (s, 1H), 5.39 (d, *J* = 12.3 Hz, 1H), 4.55 (d, *J* = 12.1 Hz, 1H).

**<sup>13</sup>C NMR** (101 MHz, CDCl<sub>3</sub>) δ 201.4, 168.0, 163.4, 159.4, 143.8, 136.6, 133.5, 132.9, 131.8, 130.8, 130.6, 130.2, 129.8, 129.1, 129.1, 128.4, 128.2, 127.8, 126.7, 126.1, 123.9, 122.7, 114.2, 60.1, 47.5.

**HRMS (ESI-TOF) m/z:** [M+H]<sup>+</sup>calculated for C<sub>32</sub>H<sub>23</sub>BrNO<sub>2</sub>S: 564.0628, found 564.0626.

**HPLC Analysis:** The enantiomeric excess was determined using ChiralPAK ADH Column, *n*-Hexane/*i*-PrOH = 90/10, flow rate 1.0 mL/min, λ = 220 nm (*t*<sub>major</sub> = 22.8 min, *t*<sub>minor</sub> = 11.52 min).

**(8*S*,9*S*, *Z*)-2,5,8-triphenyl-9-(3-(trifluoromethyl)phenyl)-8,9-dihydro-7H-oxocino[2,3-*d*]thiazol-7-one (3ka)**

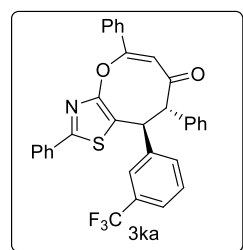

Prepared according to the general procedure using 5-alkenyl thiazolone **1k** (0.15mmol, 1.5 equiv), ynone **2a** (0.1 mmol, 1 equiv), catalyst **II** (10 mol%), 2-FC<sub>6</sub>H<sub>4</sub>COOH (30 mol%) and dry toluene (2 mL). The product **3ka** was obtained after column chromatography (hexane/EtOAc =33:1) as a brown solid. **m.p.** 211-213 °C. **Yield** = 67% (37.11 mg), **d.r.** = 20:1, **ee** = 76%.

**<sup>1</sup>H NMR** (500 MHz, CDCl<sub>3</sub>) δ 8.07 (d, *J* = 5.5 Hz, 2H), 7.69 (d, *J* = 8.2 Hz, 2H), 7.47 – 7.41 (m, 3H), 7.30 – 7.21 (m, 7H), 7.19 (s, 1H), 7.15 – 7.05 (m, 4H), 6.14 (d, *J* = 3.8 Hz, 1H), 5.37 (dd, *J* = 12.2, 3.8 Hz, 1H), 4.64 (dd, *J* = 12.2, 4.0 Hz, 1H).

<sup>13</sup>C NMR (126 MHz, CDCl<sub>3</sub>) δ 201.3, 168.0, 163.6, 159.6, 142.5, 136.6, 133.5, 132.9, 131.8, 131.2, 130.9, 129.8, 129.2, 129.1, 129.1, 128.5, 128.2, 127.9, 126.1, 124.8, 124.8, 124.8, 124.8, 124.4, 124.3, 124.3, 124.3, 123.5, 114.3, 60.3, 47.8.

**HRMS (ESI-TOF) m/z:** [M+H]<sup>+</sup>calculated for C<sub>33</sub>H<sub>23</sub>F<sub>3</sub>NO<sub>2</sub>S: 554.1397, found 554.1387.

**HPLC Analysis:** The enantiomeric excess was determined using ChiralPAK ADH Column, n-Hexane/i-PrOH = 90/10, flow rate 1.0 mL/min, λ = 220 nm (t<sub>major</sub> = 18.74 min, t<sub>minor</sub> = 8.7 min).

**(8S,9S,Z)-2,5,8-triphenyl-9-(o-tolyl)-8,9-dihydro-7H-oxocino[2,3-d]thiazol-7-one (3la)**

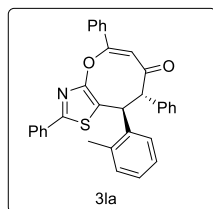

Prepared according to the general procedure using 5-alkenyl thiazolone **1l** (0.15mmol, 1.5 equiv), ynone **2a** (0.1 mmol, 1 equiv), catalyst **II** (10 mol%), 2-FC<sub>6</sub>H<sub>4</sub>COOH (30 mol%) and dry toluene (2 mL). The product **3la** was obtained after column chromatography (hexane/EtOAc =33:1) as a white solid. **m.p.** 208-210 °C.

**Yield** = 65% (32.5 mg), **d.r.** = 20:1, **ee** = 82%.

<sup>1</sup>H NMR (500 MHz, CDCl<sub>3</sub>) δ 8.06 (d, J = 4.1 Hz, 2H), 7.75 – 7.63 (m, 2H), 7.48 – 7.41 (m, 4H), 7.32 (d, J = 7.9 Hz, 2H), 7.25 (s, 3H), 7.14 (s, 1H), 7.03 (dq, J = 16.0, 7.9 Hz, 4H), 6.84 (dd, J = 27.5, 7.8 Hz, 2H), 6.10 (s, 1H), 5.54 (d, J = 12.2 Hz, 1H), 4.98 – 4.87 (m, 1H), 2.13 (s, 3H).

<sup>13</sup>C NMR (126 MHz, CDCl<sub>3</sub>) δ 202.1, 167.3, 162.6, 158.8, 140.1, 136.8, 135.1, 133.7, 133.0, 131.6, 130.7, 130.7, 129.7, 129.1, 128.9, 128.2, 128.2, 127.6, 127.6, 127.2, 126.9, 126.0, 125.6, 113.6, 60.1, 45.1, 20.2, 20.0.

**HRMS (ESI-TOF) m/z:** [M+H]<sup>+</sup>calculated for C<sub>33</sub>H<sub>26</sub>NO<sub>2</sub>S: 500.1679, found 500.1670.

**HPLC Analysis:** The enantiomeric excess was determined using ChiralPAK ADH Column, n-Hexane/i-PrOH = 90/10, flow rate 1.0 mL/min, λ = 220 nm (t<sub>major</sub> = 7.25 min, t<sub>minor</sub> = 8.82 min).

**(Z)-9-(2-methoxyphenyl)-2,5,8-triphenyl-8,9-dihydro-7H-oxocino[2,3-d]thiazol-7-one (3ma)**

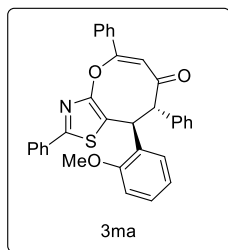

Prepared according to the general procedure using 5-alkenyl thiazolone **1m** (0.15mmol, 1.5 equiv), ynone **2a** (0.1 mmol, 1 equiv), catalyst **II** (10 mol%), 2-FC<sub>6</sub>H<sub>4</sub>COOH (30 mol%) and dry toluene (2 mL). The product **3ma** was obtained after column chromatography (hexane/EtOAc =33:1) as a white solid. **m.p.** 175-177 °C.

**Yield** = 68% (35 mg), **d.r.** = 20:1, **ee** = 84%.

<sup>1</sup>H NMR (400 MHz, CDCl<sub>3</sub>) δ 8.18 – 8.00 (m, 2H), 7.76 – 7.63 (m, 2H), 7.53 – 7.38 (m, 3H), 7.37 – 7.21 (m, 6H), 7.06 (dt, J = 14.4, 7.2 Hz, 3H), 6.95 (t, J = 7.9 Hz, 1H), 6.70 (t, J = 7.6 Hz, 1H), 6.57 (d, J = 8.3 Hz, 1H), 6.14 (s, 1H), 5.68 (d, J = 12.6 Hz, 1H), 5.28 (d, J = 13.0 Hz, 1H), 3.63 (s, 3H).

$^{13}\text{C}$  NMR (101 MHz,  $\text{CDCl}_3$ )  $\delta$  202.2, 167.9, 162.4, 159.3, 156.4, 137.1, 133.8, 133.2, 131.6, 130.5, 130.0, 129.7, 129.0, 128.4, 128.2, 127.9, 127.3, 126.0, 125.0, 121.1, 114.0, 111.0, 58.5, 55.6.

**HRMS (ESI-TOF) m/z:**  $[\text{M}+\text{H}]^+$  calculated for  $\text{C}_{33}\text{H}_{25}\text{NO}_3\text{S}$ : 516.1628, found 516.1642.

**HPLC Analysis:** The enantiomeric excess was determined using ChiralPAK ADH Column, *n*-Hexane/*i*-PrOH = 90/10, flow rate 1.0 mL/min,  $\lambda = 220$  nm ( $t_{\text{major}} = 10.36$  min,  $t_{\text{minor}} = 11.27$  min).

**(8S,9S,Z)-9-(2-fluorophenyl)-2,5,8-triphenyl-8,9-dihydro-7H-oxocino[2,3-d]thiazol-7-one (3na)**

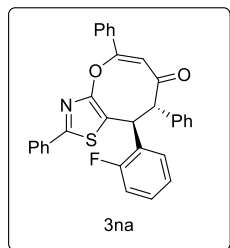

Prepared according to the general procedure using 5-alkenyl thiazolone **1n** (0.15mmol, 1.5 equiv), ynone **2a** (0.1 mmol, 1 equiv), catalyst **II** (10 mol%), 2- $\text{FC}_6\text{H}_4\text{COOH}$  (30 mol%) and dry toluene (2 mL). The product **3na** was obtained after column chromatography (hexane/EtOAc =33:1) as a white solid. **m.p.** 223-225 °C.

**Yield** = 60% (30.24 mg), **d.r.** = 20:1, **ee** = 82%.

$^1\text{H}$  NMR (400 MHz,  $\text{CDCl}_3$ )  $\delta$  8.20 (dd,  $J = 6.8, 3.0$  Hz, 2H), 7.82 (dd,  $J = 6.7, 3.1$  Hz, 2H), 7.61 – 7.53 (m, 3H), 7.45 (t,  $J = 6.1$  Hz, 3H), 7.42 – 7.35 (m, 4H), 7.20 (dt,  $J = 12.0, 6.8$  Hz, 3H), 7.11 – 7.04 (m, 1H), 7.00 (t,  $J = 7.4$  Hz, 1H), 6.85 (t,  $J = 9.1$  Hz, 1H), 6.26 (s, 1H), 5.74 (d,  $J = 12.5$  Hz, 1H), 5.17 (d,  $J = 12.5$  Hz, 1H).

$^{13}\text{C}$  NMR (101 MHz,  $\text{CDCl}_3$ )  $\delta$  201.5, 168.1, 163.1, 161.2, 159.4, 158.7, 136.6, 133.6, 133.0, 131.8, 130.8, 129.7, 129.3, 129.2, 129.2, 129.1, 129.1, 129.1, 128.3, 128.3, 127.7, 126.1, 124.8, 124.7, 123.8, 115.9, 115.7, 114.1, 58.5, 39.8.

**HRMS (ESI-TOF) m/z:**  $[\text{M}+\text{H}]^+$  calculated for  $\text{C}_{32}\text{H}_{23}\text{FNO}_2\text{S}$ : 504.1429, found 504.1453.

**HPLC Analysis:** The enantiomeric excess was determined using ChiralPAK ADH Column, *n*-Hexane/*i*-PrOH = 90/10, flow rate 1.0 mL/min,  $\lambda = 220$  nm ( $t_{\text{major}} = 12.5$  min,  $t_{\text{minor}} = 11.58$  min).

**(8S,9S,Z)-9-(2-chlorophenyl)-2,5,8-triphenyl-8,9-dihydro-7H-oxocino[2,3-d]thiazol-7-one (3oa)**

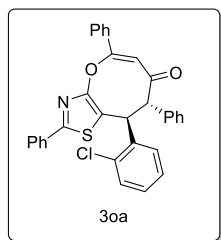

Prepared according to the general procedure using 5-alkenyl thiazolone **1o** (0.15mmol, 1.5 equiv), ynone **2a** (0.1 mmol, 1 equiv), catalyst **II** (10 mol%), 2- $\text{FC}_6\text{H}_4\text{COOH}$  (30 mol%) and dry toluene (2 mL). The product **3oa** was obtained after column chromatography (hexane/EtOAc =33:1) as a white solid. **m.p.** 202-204 °C.

**Yield** = 62% (32.2 mg), **d.r.** = 20:1, **ee** = 84%.

$^1\text{H}$  NMR (500 MHz,  $\text{CDCl}_3$ )  $\delta$  8.35 – 8.23 (m, 2H), 7.97 – 7.82 (m, 2H), 7.70 (d,  $J = 8.2$  Hz, 1H), 7.68 – 7.62 (m, 3H), 7.55 (d,  $J = 7.9$  Hz, 2H), 7.46 (d,  $J = 6.2$  Hz, 3H), 7.32 – 7.21 (m, 5H), 7.10 (t,  $J = 7.8$  Hz, 1H), 6.36 (s, 1H), 5.90 (d,  $J = 12.6$  Hz, 1H), 5.57 (d,  $J = 11.0$  Hz, 1H).

$^{13}\text{C}$  NMR (126 MHz,  $\text{CDCl}_3$ )  $\delta$  201.2, 168.0, 163.1, 159.1, 139.2, 136.3, 133.6, 133.1, 132.9, 131.8, 130.7, 129.9, 129.7, 129.1, 129.1, 128.6, 128.2, 128.2, 127.7, 127.7, 126.0, 124.1, 114.0, 58.8.

**HRMS (ESI-TOF) m/z:**  $[\text{M}+\text{H}]^+$  calculated for  $\text{C}_{32}\text{H}_{23}\text{ClNO}_2\text{S}$ : 520.1133, found 520.1140.

**HPLC Analysis:** The enantiomeric excess was determined using ChiralPAK ADH Column, *n*-Hexane/*i*-PrOH = 90/10, flow rate 1.0 mL/min,  $\lambda = 220$  nm ( $t_{\text{major}} = 8.5$  min,  $t_{\text{minor}} = 9.8$  min).

**(8S,9S, Z)-9-(2-bromophenyl)-2,5,8-triphenyl-8,9-dihydro-7H-oxocino[2,3-d]thiazol-7-one (3pa)**

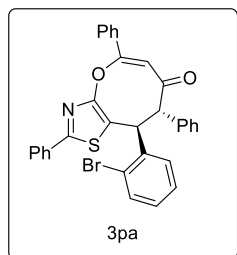

Prepared according to the general procedure using 5-alkenyl thiazolone **1p** (0.15mmol, 1.5 equiv), ynone **2a** (0.1 mmol, 1 equiv), catalyst **II** (10 mol%), 2- $\text{FC}_6\text{H}_4\text{COOH}$  (30 mol%) and dry toluene (2 mL). The product **3pa** was obtained after column chromatography (hexane/EtOAc =33:1) as a white solid. **m.p.** 224-226 °C. **Yield** = 67% (37.7 mg), **d.r.** = 20:1, **ee** = 92%.

$^1\text{H}$  NMR (400 MHz,  $\text{CDCl}_3$ )  $\delta$  8.20 (dd,  $J = 4.4, 2.8$  Hz, 2H), 7.88 – 7.80 (m, 2H), 7.65 (d,  $J = 7.5$  Hz, 1H), 7.58 (d,  $J = 3.0$  Hz, 3H), 7.52 – 7.45 (m, 2H), 7.43 – 7.33 (m, 4H), 7.20 (ddd,  $J = 14.4, 7.8, 6.2$  Hz, 4H), 6.95 (td,  $J = 7.5, 1.6$  Hz, 1H), 6.27 (s, 1H), 5.81 (d,  $J = 12.0$  Hz, 1H), 5.49 (d,  $J = 12.4$  Hz, 1H).

$^{13}\text{C}$  NMR (101 MHz,  $\text{CDCl}_3$ )  $\delta$  201.1, 167.9, 163.1, 159.0, 141.0, 136.2, 133.6, 133.2, 132.9, 131.8, 130.7, 129.8, 129.1, 129.1, 128.9, 128.3, 128.2, 128.2, 127.7, 126.1, 124.1, 124.0, 114.0, 59.1, 44.5.

**HRMS (ESI-TOF) m/z:**  $[\text{M}+\text{H}]^+$  calculated for  $\text{C}_{32}\text{H}_{23}\text{BrNO}_2\text{S}$ : 564.0628, found 564.0614.

**HPLC Analysis:** The enantiomeric excess was determined using ChiralPAK ADH Column, *n*-Hexane/*i*-PrOH = 90/10, flow rate 1.0 mL/min,  $\lambda = 220$  nm ( $t_{\text{major}} = 9.0$  min,  $t_{\text{minor}} = 10.76$  min).

**(8S,9S, Z)-9-(2,4-dimethylphenyl)-2,5,8-triphenyl-8,9-dihydro-7H-oxocino[2,3-d]thiazol-7-one (3qa)**

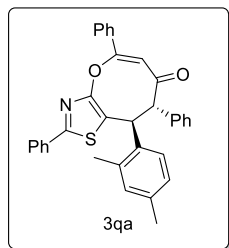

Prepared according to the general procedure using 5-alkenyl thiazolone **1q** (0.15mmol, 1.5 equiv), ynone **2a** (0.1 mmol, 1 equiv), catalyst **II** (10 mol%), 2- $\text{FC}_6\text{H}_4\text{COOH}$  (30 mol%) and dry toluene (2 mL). The product **3qa** was obtained after column chromatography (hexane/EtOAc =33:1) as a white solid. **m.p.** 200-202 °C.

**Yield** = 82% (42.1 mg), **d.r.** = 20:1, **ee** = 74%.

$^1\text{H}$  NMR (400 MHz,  $\text{CDCl}_3$ )  $\delta$  8.22 – 8.16 (m, 2H), 7.85 – 7.79 (m, 2H), 7.60 – 7.53 (m, 3H), 7.50 – 7.44 (m, 3H), 7.38 (dd,  $J = 5.1, 1.9$  Hz, 3H), 7.24 – 7.16 (m, 3H), 6.93 (dd,  $J = 8.0, 2.0$  Hz, 1H), 6.77 (d,  $J = 2.0$  Hz, 1H), 6.23 (s, 1H), 5.66 (d,  $J = 12.1$  Hz, 1H), 5.03 (d,  $J = 12.1$  Hz, 1H), 2.24 (s, 3H), 2.18 (s, 3H).

$^{13}\text{C}$  NMR (101 MHz,  $\text{CDCl}_3$ )  $\delta$  202.2, 167.1, 162.5, 158.6, 137.1, 136.9, 136.7, 134.8, 133.7, 133.0, 131.6, 131.5, 130.6, 129.7, 129.0, 128.1, 128.1, 127.6, 127.6, 126.0, 113.5, 60.1, 21.1, 19.9.

**HRMS (ESI-TOF) m/z:**  $[M+H]^+$  calculated for  $C_{34}H_{28}NO_2S$ : 514.1836, found 514.1857.

**HPLC Analysis:** The enantiomeric excess was determined using ChiralPAK ADH Column, *n*-Hexane/*i*-PrOH = 90/10, flow rate 1.0 mL/min,  $\lambda = 220$  nm ( $t_{major} = 6.58$  min,  $t_{minor} = 7.5$  min).

**(8S,9S,Z)-9-(2,4-dimethoxyphenyl)-2,5,8-triphenyl-8,9-dihydro-7H-oxocino[2,3-d]thiazol-7-one (3ra)**

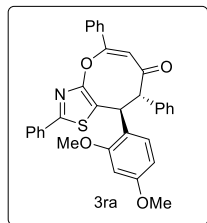

Prepared according to the general procedure using 5-alkenyl thiazolone **1r** (0.15mmol, 1.5 equiv), ynone **2a** (0.1 mmol, 1 equiv), catalyst **II** (10 mol%), 2-FC<sub>6</sub>H<sub>4</sub>COOH (30 mol%) and dry toluene (2 mL). The product **3ra** was obtained after column chromatography (hexane/EtOAc =33:1) as a white solid. **m.p.** 182-184 °C.

**Yield** = 78% (42.5 mg), **d.r.** = 20:1, **ee** = 82%.

**<sup>1</sup>H NMR** (400 MHz, CDCl<sub>3</sub>)  $\delta$  8.26 (dd,  $J = 6.8, 3.1$  Hz, 2H), 7.88 (dd,  $J = 6.8, 3.0$  Hz, 2H), 7.67 – 7.58 (m, 3H), 7.51 (d,  $J = 7.0$  Hz, 2H), 7.47 – 7.41 (m, 3H), 7.32 (s, 1H), 7.24 (dt,  $J = 14.5, 6.9$  Hz, 3H), 7.04 (d,  $J = 2.9$  Hz, 1H), 6.72 – 6.62 (m, 2H), 6.31 (s, 1H), 5.82 (d,  $J = 12.5$  Hz, 1H), 5.43 (d,  $J = 12.5$  Hz, 1H), 3.77 (s, 3H), 3.73 (s, 3H).

**<sup>13</sup>C NMR** (101 MHz, CDCl<sub>3</sub>)  $\delta$  202.0, 168.0, 162.5, 159.3, 153.8, 150.7, 137.0, 133.7, 133.1, 131.6, 131.1, 130.5, 129.7, 129.0, 128.2, 128.0, 127.4, 126.0, 124.9, 114.6, 113.9, 112.6, 112.1, 58.5, 56.2, 55.8.

**HRMS (ESI-TOF) m/z:**  $[M+H]^+$  calculated for  $C_{34}H_{28}NO_4S$ : 546.1734, found 546.1711.

**HPLC Analysis:** The enantiomeric excess was determined using ChiralPAK IA Column, *n*-Hexane/*i*-PrOH = 90/10, flow rate 1.0 mL/min,  $\lambda = 220$  nm ( $t_{major} = 13.8$  min,  $t_{minor} = 15.6$  min).

**(8S,9S,Z)-9-(2,4-difluorophenyl)-2,5,8-triphenyl-8,9-dihydro-7H-oxocino[2,3-d]thiazol-7-one (3sa)**

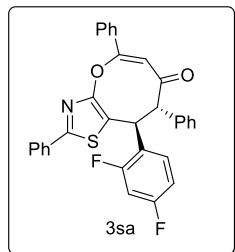

Prepared according to the general procedure using 5-alkenyl thiazolone **1s** (0.15mmol, 1.5 equiv), ynone **2a** (0.1 mmol, 1 equiv), catalyst **II** (10 mol%), 2-FC<sub>6</sub>H<sub>4</sub>COOH (30 mol%) and dry toluene (2 mL). The product **3sa** was obtained after column chromatography (hexane/EtOAc =33:1) as a white solid. **m.p.** 164-166 °C.

**Yield** = 67% (34.97 mg), **d.r.** = 20:1, **ee** = 88%.

**<sup>1</sup>H NMR** (500 MHz, CDCl<sub>3</sub>)  $\delta$  8.26 (dd,  $J = 6.6, 3.2$  Hz, 2H), 7.89 (d,  $J = 7.1$  Hz, 2H), 7.63 (q,  $J = 2.8$  Hz, 3H), 7.52 (d,  $J = 7.8$  Hz, 2H), 7.45 (d,  $J = 7.1$  Hz, 4H), 7.29 (dt,  $J = 14.9, 8.4$  Hz, 3H), 6.81 (t,  $J = 8.4$  Hz, 1H), 6.66 (t,  $J = 9.5$  Hz, 1H), 6.33 (d,  $J = 2.5$  Hz, 1H), 5.76 (dd,  $J = 12.5, 2.0$  Hz, 1H), 5.18 (dd,  $J = 12.4, 2.2$  Hz, 1H).

**<sup>13</sup>C NMR** (126 MHz, CDCl<sub>3</sub>)  $\delta$  201.1, 168.1, 163.3, 163.1, 163.0, 161.1, 161.0, 161.0, 159.5, 159.1, 159.0, 136.5, 133.5, 132.9, 131.8, 130.9, 130.2, 130.2, 130.2, 130.1, 129.7, 129.1, 129.1, 128.4, 128.3,

127.9, 126.1, 124.8, 124.8, 124.7, 124.7, 123.5, 114.1, 112.2, 112.2, 112.1, 112.0, 104.3, 104.1, 103.9, 58.6, 39.6.

**HRMS (ESI-TOF) m/z:**  $[M+H]^+$  calculated for  $C_{32}H_{22}F_2NO_2S$ : 522.1334, found 522.1346.

**HPLC Analysis:** The enantiomeric excess was determined using ChiralPAK ADH Column, *n*-Hexane/*i*-PrOH = 90/10, flow rate 1.0 mL/min,  $\lambda = 220$  nm ( $t_{major} = 13.0$  min,  $t_{minor} = 11.0$  min).

**(8S,9S,Z)-9-(2-bromo-3-methylphenyl)-2,5,8-triphenyl-8,9-dihydro-7H-oxocino[2,3-d]thiazol-7-one (3ta)**

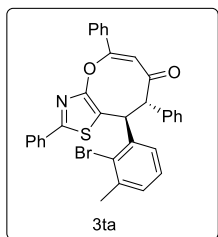

Prepared according to the general procedure using 5-alkenyl thiazolone **1t** (0.15mmol, 1.5 equiv), ynone **2a** (0.1 mmol, 1 equiv), catalyst **II** (10 mol%), 2-FC<sub>6</sub>H<sub>4</sub>COOH (30 mol%) and dry toluene (2 mL). The product **3ta** was obtained after column chromatography (hexane/EtOAc =33:1) as a white solid. **m.p.** 158-160 °C.

**Yield** = 78% (45 mg), **d.r.** = 20:1, **ee** = 90%.

**<sup>1</sup>H NMR** (400 MHz, CDCl<sub>3</sub>)  $\delta$  8.00 – 7.93 (m, 2H), 7.63 – 7.57 (m, 2H), 7.38 – 7.31 (m, 3H), 7.30 – 7.23 (m, 3H), 7.15 (dd,  $J = 5.1, 2.1$  Hz, 3H), 6.99 (dd,  $J = 8.3, 6.4$  Hz, 2H), 6.96 – 6.91 (m, 1H), 6.86 (t,  $J = 7.6$  Hz, 1H), 6.74 (dd,  $J = 7.6, 1.8$  Hz, 1H), 6.03 (s, 1H), 5.57 (d,  $J = 12.5$  Hz, 1H), 5.42 (d,  $J = 12.5$  Hz, 1H), 2.09 (s, 3H).

**<sup>13</sup>C NMR** (101 MHz, CDCl<sub>3</sub>)  $\delta$  201.2, 167.8, 162.8, 158.9, 141.3, 139.1, 136.4, 133.6, 133.0, 131.7, 130.7, 129.9, 129.7, 129.1, 129.0, 127.7, 126.1, 113.8, 59.4, 44.7, 24.7.

**HRMS (ESI-TOF) m/z:**  $[M+H]^+$  calculated for  $C_{33}H_{25}BrNO_2S$ : 578.0784, found 578.0779.

**HPLC Analysis:** The enantiomeric excess was determined using ChiralPAK ADH Column, *n*-Hexane/*i*-PrOH = 90/10, flow rate 1.0 mL/min,  $\lambda = 220$  nm ( $t_{major} = 7.66$  min,  $t_{minor} = 9.94$  min).

**(8S,9S,Z)-9-(2-bromo-5-methylphenyl)-2,5,8-triphenyl-8,9-dihydro-7H-oxocino[2,3-d]thiazol-7-one (3ua)**

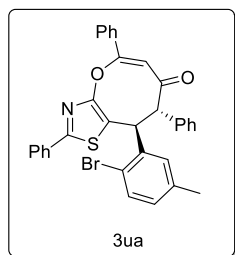

Prepared according to the general procedure using 5-alkenyl thiazolone **1u** (0.15mmol, 1.5 equiv), ynone **2a** (0.1 mmol, 1 equiv), catalyst **II** (10 mol%), 2-FC<sub>6</sub>H<sub>4</sub>COOH (30 mol%) and dry toluene (2 mL). The product **3ua** was obtained after column chromatography (hexane/EtOAc =33:1) as a white solid. **m.p.** 182-184 °C.

**Yield** = 75% (43.3 mg), **d.r.** = 20:1, **ee** = 84%.

**<sup>1</sup>H NMR** (400 MHz, CDCl<sub>3</sub>)  $\delta$  8.11 (dd,  $J = 6.8, 3.1$  Hz, 2H), 7.73 (dd,  $J = 6.4, 3.3$  Hz, 2H), 7.55 – 7.43 (m, 3H), 7.42 – 7.34 (m, 2H), 7.28 (dt,  $J = 4.8, 2.9$  Hz, 4H), 7.12 (dd,  $J = 13.3, 8.0$  Hz, 3H), 7.07 (d,  $J = 7.1$  Hz, 1H), 6.64 (dd,  $J = 8.3, 2.4$  Hz, 1H), 6.16 (s, 1H), 5.69 (d,  $J = 12.1$  Hz, 1H), 5.35 (d,  $J = 12.6$  Hz, 1H), 2.10 (s, 3H).

$^{13}\text{C}$  NMR (101 MHz,  $\text{CDCl}_3$ )  $\delta$  201.2, 168.0, 163.0, 159.0, 140.6, 138.3, 136.3, 133.6, 133.0, 132.8, 131.8, 130.7, 130.0, 129.8, 129.3, 129.1, 129.1, 128.3, 128.2, 127.7, 126.1, 124.4, 120.6, 114.1, 59.0, 44.3, 21.2.

**HRMS (ESI-TOF) m/z:**  $[\text{M}+\text{H}]^+$  calculated for  $\text{C}_{33}\text{H}_{25}\text{BrNO}_2\text{S}$ : 578.0784, found 578.0797.

**HPLC Analysis:** The enantiomeric excess was determined using ChiralPAK ADH Column, *n*-Hexane/*i*-PrOH = 90/10, flow rate 1.0 mL/min,  $\lambda$  = 220 nm ( $t_{\text{major}}$  = 10.05 min,  $t_{\text{minor}}$  = 11.04 min).

**(8S,9S,Z)-2,8,9-triphenyl-5-(p-tolyl)-8,9-dihydro-7H-oxocino[2,3-d]thiazol-7-one (3ab)**

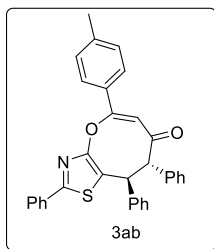

Prepared according to the general procedure using 5-alkenyl thiazolone **1a** (0.15mmol, 1.5 equiv), ynone **2b** (0.1 mmol, 1 equiv), catalyst **II** (10 mol%), 2- $\text{FC}_6\text{H}_4\text{COOH}$  (30 mol%) and dry toluene (2 mL). The product **3ab** was obtained after column chromatography (hexane/EtOAc =33:1) as a white solid. **m.p.** 242-244 °C.

**Yield** = 63% (31.5 mg), **d.r.** = 20:1, **ee** = 96%.

$^1\text{H}$  NMR (500 MHz,  $\text{CDCl}_3$ )  $\delta$  8.27 (d,  $J$  = 8.2 Hz, 2H), 8.00 (d,  $J$  = 7.5 Hz, 2H), 7.58 (q,  $J$  = 10.9, 9.3 Hz, 7H), 7.34 (tdd,  $J$  = 24.6, 16.0, 7.4 Hz, 9H), 6.39 (s, 1H), 5.74 (d,  $J$  = 12.2 Hz, 1H), 4.89 (d,  $J$  = 12.2 Hz, 1H), 2.66 (s, 3H).

$^{13}\text{C}$  NMR (126 MHz,  $\text{CDCl}_3$ )  $\delta$  201.8, 168.2, 162.9, 159.3, 142.3, 141.7, 137.2, 133.0, 130.8, 130.6, 129.9, 129.8, 129.0, 128.7, 128.2, 128.2, 127.9, 127.5, 127.4, 126.0, 124.9, 113.4, 60.3, 47.9, 21.8.

**HRMS (ESI-TOF) m/z:**  $[\text{M}+\text{H}]^+$  calculated for  $\text{C}_{33}\text{H}_{26}\text{NO}_2\text{S}$ : 500.1679, found 500.1697.

**HPLC Analysis:** The enantiomeric excess was determined using ChiralPAK ADH Column, *n*-Hexane/*i*-PrOH = 90/10, flow rate 1.0 mL/min,  $\lambda$  = 220 nm ( $t_{\text{major}}$  = 17.0 min,  $t_{\text{minor}}$  = 18.74 min).

**(8S,9S, Z)-5-(4-(tert-butyl)phenyl)-2,8,9-triphenyl-8,9-dihydro-7H-oxocino[2,3-d]thiazol-7-one (3ac)**

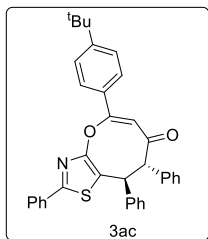

Prepared according to the general procedure using 5-alkenyl thiazolone **1a** (0.15mmol, 1.5 equiv), ynone **2c** (0.1 mmol, 1 equiv), catalyst **II** (10 mol%), 2- $\text{FC}_6\text{H}_4\text{COOH}$  (30 mol%) and dry toluene (2 mL). The product **3ac** was obtained after column chromatography (hexane/EtOAc =33:1) as a white solid. **m.p.** 226-228 °C.

**Yield** = 70% (37.9 mg), **d.r.** = 20:1, **ee** = 89%.

$^1\text{H}$  NMR (400 MHz,  $\text{CDCl}_3$ )  $\delta$  8.12 – 8.02 (m, 2H), 7.78 – 7.70 (m, 2H), 7.56 – 7.48 (m, 2H), 7.37 – 7.25 (m, 5H), 7.18 – 6.97 (m, 8H), 6.16 (s, 1H), 5.48 (d,  $J$  = 12.1 Hz, 1H), 4.64 (d,  $J$  = 12.1 Hz, 1H), 1.33 (s, 9H).

$^{13}\text{C}$  NMR (101 MHz,  $\text{CDCl}_3$ )  $\delta$  201.8, 168.1, 162.9, 159.3, 155.4, 141.7, 137.2, 133.0, 130.7, 130.6, 129.9, 129.0, 128.7, 128.2, 128.1, 127.9, 127.5, 127.4, 126.1, 126.0, 124.9, 113.4, 60.4, 47.8, 35.2, 31.4.

**HRMS (ESI-TOF) m/z:**  $[\text{M}+\text{H}]^+$  calculated for  $\text{C}_{36}\text{H}_{32}\text{NO}_2\text{S}$ : 542.2149, found 542.2155.

**HPLC Analysis:** The enantiomeric excess was determined using ChiralPAK ADH Column, *n-Hexane/i-PrOH* = 90/10, flow rate 1.0 mL/min,  $\lambda$  = 220 nm ( $t_{major}$  = 10.88 min,  $t_{minor}$  = 7.79 min).

**(8S,9S, Z)-5-(4-fluorophenyl)-2,8,9-triphenyl-8,9-dihydro-7H-oxocino[2,3-d]thiazol-7-one (3ad)**

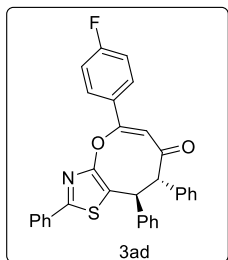

Prepared according to the general procedure using 5-alkenyl thiazolone **1a** (0.15mmol, 1.5 equiv), ynone **2d** (0.1 mmol, 1 equiv), catalyst **II** (10 mol%), 2-FC<sub>6</sub>H<sub>4</sub>COOH (30 mol%) and dry toluene (2 mL). The product **3ad** was obtained after column chromatography (hexane/EtOAc =33:1) as a white solid. **m.p.** 208-210 °C.

**Yield** = 60% (30.2 mg), **d.r.** = 20:1, **ee** = 94%.

**<sup>1</sup>H NMR** (400 MHz, CDCl<sub>3</sub>)  $\delta$  8.23 – 8.15 (m, 2H), 7.83 – 7.75 (m, 2H), 7.44 – 7.32 (m, 5H), 7.26 – 7.06 (m, 10H), 6.17 (s, 1H), 5.53 (d,  $J$  = 12.1 Hz, 1H), 4.70 (d,  $J$  = 12.3 Hz, 1H).

**<sup>13</sup>C NMR** (101 MHz, CDCl<sub>3</sub>)  $\delta$  201.6, 167.0, 166.3, 163.8, 163.1, 159.1, 141.5, 137.0, 132.9, 130.7, 130.5, 130.4, 129.9, 129.1, 128.7, 128.3, 127.9, 127.6, 127.4, 126.0, 124.9, 116.3, 116.1, 114.0, 114.0, 60.4, 47.9.

**HRMS (ESI-TOF) m/z:** [M+H]<sup>+</sup>calculated for C<sub>32</sub>H<sub>23</sub>FNO<sub>2</sub>S: 504.1429, found 504.1433.

**HPLC Analysis:** The enantiomeric excess was determined using ChiralPAK ADH Column, *n-Hexane/i-PrOH* = 90/10, flow rate 1.0 mL/min,  $\lambda$  = 220 nm ( $t_{major}$  = 18.79 min,  $t_{minor}$  = 17.49 min).

**(8S,9S, Z)-5-(4-chlorophenyl)-2,8,9-triphenyl-8,9-dihydro-7H-oxocino[2,3-d]thiazol-7-one (3ae)**

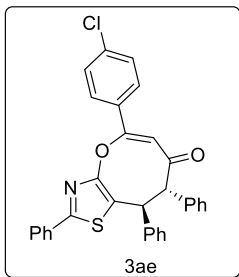

Prepared according to the general procedure using 5-alkenyl thiazolone **1a** (0.15mmol, 1.5 equiv), ynone **2e** (0.1 mmol, 1 equiv), catalyst **II** (10 mol%), 2-FC<sub>6</sub>H<sub>4</sub>COOH (30 mol%) and dry toluene (2 mL). The product **3ae** was obtained after column chromatography (hexane/EtOAc =33:1) as a white solid. **m.p.** 232-234 °C.

**Yield** = 61% (31.7 mg), **d.r.** = 20:1, **ee** = 92%.

**<sup>1</sup>H NMR** (400 MHz, CDCl<sub>3</sub>)  $\delta$  8.17 – 8.09 (m, 2H), 7.86 – 7.77 (m, 2H), 7.58 – 7.50 (m, 2H), 7.40 (ddt,  $J$  = 7.4, 5.4, 2.3 Hz, 5H), 7.25 – 7.19 (m, 3H), 7.18 – 7.13 (m, 4H), 7.13 – 7.09 (m, 1H), 6.22 (s, 1H), 5.54 (d,  $J$  = 12.1 Hz, 1H), 4.71 (d,  $J$  = 12.1 Hz, 1H).

**<sup>13</sup>C NMR** (101 MHz, CDCl<sub>3</sub>)  $\delta$  201.6, 166.7, 163.2, 159.1, 141.5, 137.9, 136.9, 132.9, 132.2, 130.8, 129.9, 129.4, 129.4, 129.1, 128.7, 128.3, 127.9, 127.6, 127.5, 126.0, 124.9, 114.5, 60.4, 47.9.

**HRMS (ESI-TOF) m/z:** [M+H]<sup>+</sup>calculated for C<sub>32</sub>H<sub>23</sub>ClNO<sub>2</sub>S: 520.1133, found 520.1129.

**HPLC Analysis:** The enantiomeric excess was determined using ChiralPAK ID Column, *n-Hexane/i-PrOH* = 90/10, flow rate 1.0 mL/min,  $\lambda$  = 220 nm ( $t_{major}$  = 11.7 min,  $t_{minor}$  = 9.95 min).

**(8S,9S, Z)-5-(4-bromophenyl)-2,8,9-triphenyl-8,9-dihydro-7H-oxocino[2,3-d]thiazol-7-one (3af)**

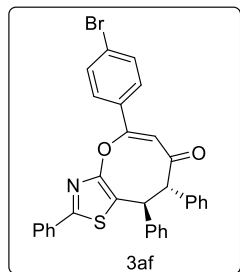

Prepared according to the general procedure using 5-alkenyl thiazolone **1a** (0.15mmol, 1.5 equiv), ynone **2f** (0.1 mmol, 1 equiv), catalyst **II** (10 mol%), 2-FC<sub>6</sub>H<sub>4</sub>COOH (30 mol%) and dry toluene (2 mL). The product **3af** was obtained after column chromatography (hexane/EtOAc =33:1) as a white solid. **m.p.** 209-211 °C.

**Yield** = 60% (33.8 mg), **d.r.** = 20:1, **ee** = 82%.

**<sup>1</sup>H NMR** (400 MHz, CDCl<sub>3</sub>) δ 8.19 (dd, *J* = 6.8, 3.1 Hz, 1H), 8.05 (d, *J* = 8.6 Hz, 1H), 7.81 (ddd, *J* = 7.6, 5.6, 2.4 Hz, 2H), 7.70 (d, *J* = 8.6 Hz, 1H), 7.59 – 7.53 (m, 1H), 7.40 (td, *J* = 5.4, 2.5 Hz, 6H), 7.24 – 7.18 (m, 3H), 7.15 (ddt, *J* = 8.0, 5.3, 2.7 Hz, 4H), 7.12 – 7.08 (m, 1H), 6.26 – 6.19 (m, 1H), 5.53 (dd, *J* = 12.1, 9.3 Hz, 1H), 4.70 (dd, *J* = 12.2, 4.3 Hz, 1H).

**<sup>13</sup>C NMR** (101 MHz, CDCl<sub>3</sub>) δ 201.8, 201.6, 167.8, 166.7, 163.2, 159.0, 147.3, 141.6, 141.4, 137.0, 136.9, 133.6, 133.0, 132.9, 132.6, 132.3, 131.6, 130.7, 130.7, 130.6, 129.9, 129.8, 129.8, 129.5, 129.2, 129.1, 129.0, 129.0, 128.7, 128.7, 128.7, 128.3, 128.2, 128.2, 128.2, 127.9, 127.8, 127.6, 127.5, 127.5, 127.4, 127.4, 127.3, 126.3, 126.0, 126.0, 124.9, 124.8, 114.5, 114.1, 113.3, 60.4, 60.4, 60.3, 47.9, 47.8.

**HRMS (ESI-TOF) m/z:** [M+H]<sup>+</sup>calculated for C<sub>32</sub>H<sub>23</sub>BrNO<sub>2</sub>S: 564.0628, found 564.0614.

**HPLC Analysis:** The enantiomeric excess was determined using ChiralPAK ID Column, *n*-Hexane/*i*-PrOH = 90/10, flow rate 1.0 mL/min, λ = 220 nm (*t*<sub>major</sub> = 10.26 min, *t*<sub>minor</sub> = 12.56 min).

**(8*S*,9*S*, *Z*)-2,8,9-triphenyl-5-(*m*-tolyl)-8,9-dihydro-7*H*-oxocino[2,3-*d*]thiazol-7-one (**3ag**)**

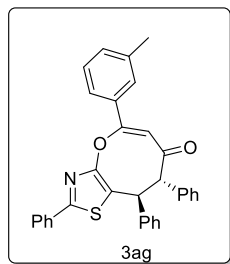

Prepared according to the general procedure using 5-alkenyl thiazolone **1a** (0.15mmol, 1.5 equiv), ynone **2g** (0.1 mmol, 1 equiv), catalyst **II** (10 mol%), 2-FC<sub>6</sub>H<sub>4</sub>COOH (30 mol%) and dry toluene (2 mL). The product **3ag** was obtained after column chromatography (hexane/EtOAc =33:1) as a white solid. **m.p.** 212-214 °C.

**Yield** = 67% (33.5 mg), **d.r.** = 20:1, **ee** = 90%.

**<sup>1</sup>H NMR** (500 MHz, CDCl<sub>3</sub>) δ 7.95 (d, *J* = 9.2 Hz, 2H), 7.72 (d, *J* = 7.2 Hz, 2H), 7.37 (d, *J* = 8.9 Hz, 3H), 7.29 (d, *J* = 10.3 Hz, 4H), 7.14 (dd, *J* = 16.6, 8.9 Hz, 5H), 7.07 (q, *J* = 7.6, 5.3 Hz, 2H), 7.02 (d, *J* = 7.9 Hz, 1H), 6.18 (d, *J* = 4.1 Hz, 1H), 5.50 (dd, *J* = 12.2, 4.1 Hz, 1H), 4.67 (dd, *J* = 12.2, 4.3 Hz, 1H), 2.42 (s, 3H).

**<sup>13</sup>C NMR** (126 MHz, CDCl<sub>3</sub>) δ 201.7, 168.0, 162.9, 159.2, 141.6, 138.6, 137.0, 133.5, 132.9, 132.5, 130.6, 129.8, 129.0, 128.9, 128.7, 128.6, 128.2, 127.8, 127.5, 127.3, 125.9, 125.4, 124.9, 113.9, 60.4, 47.7, 21.7.

**HRMS (ESI-TOF) m/z:** [M+H]<sup>+</sup>calculated for C<sub>33</sub>H<sub>26</sub>NO<sub>2</sub>S: 500.1679, found 500.1683.

**HPLC Analysis:** The enantiomeric excess was determined using ChiralPAK ADH Column, *n*-Hexane/*i*-PrOH = 90/10, flow rate 1.0 mL/min, λ = 220 nm (*t*<sub>major</sub> = 17.8 min, *t*<sub>minor</sub> = 12.48 min).

**(8S,9S,Z)-5-(3-methoxyphenyl)-2,8,9-triphenyl-8,9-dihydro-7H-oxocino[2,3-d]thiazol-7-one (3ah)**

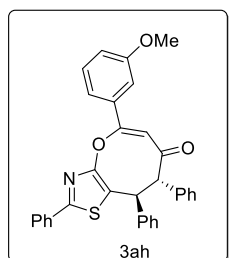

Prepared according to the general procedure using 5-alkenyl thiazolone **1a** (0.15mmol, 1.5 equiv), ynone **2h** (0.1 mmol, 1 equiv), catalyst **II** (10 mol%), 2-FC<sub>6</sub>H<sub>4</sub>COOH (30 mol%) and dry toluene (2 mL). The product **3ah** was obtained after column chromatography (hexane/EtOAc =33:1) as a white solid. **m.p.** 170-172 °C.

**Yield** = 71% (36.6 mg), **d.r.** = 20:1, **ee** = 90%.

**<sup>1</sup>H NMR** (400 MHz, CDCl<sub>3</sub>) δ 7.75 – 7.65 (m, 3H), 7.59 (d, *J* = 7.8 Hz, 1H), 7.34 – 7.22 (m, 6H), 7.04 (ddd, *J* = 24.8, 12.9, 7.2 Hz, 10H), 6.11 (s, 1H), 5.43 (d, *J* = 12.1 Hz, 1H), 4.59 (d, *J* = 12.1 Hz, 1H), 3.84 (s, 3H).

**<sup>13</sup>C NMR** (101 MHz, CDCl<sub>3</sub>) δ 201.8, 167.7, 163.0, 160.1, 159.2, 141.6, 137.0, 135.0, 133.0, 130.7, 130.0, 129.9, 129.0, 128.7, 128.3, 127.9, 127.6, 127.4, 125.9, 124.9, 120.6, 118.1, 114.4, 112.9, 60.3, 55.7, 47.9.

**HRMS (ESI-TOF) m/z:** [M+H]<sup>+</sup>calculated for C<sub>33</sub>H<sub>26</sub>NO<sub>3</sub>S: 516.1628, found 516.1622.

**HPLC Analysis:** The enantiomeric excess was determined using ChiralPAK ADH Column, *n-Hexane/i-PrOH* = 90/10, flow rate 1.0 mL/min, λ = 220 nm (*t*<sub>major</sub> = 35.0 min, *t*<sub>minor</sub> = 18.0 min).

**(8S,9S,Z)-2,8,9-triphenyl-5-(*o*-tolyl)-8,9-dihydro-7H-oxocino[2,3-d]thiazol-7-one (3ai)**

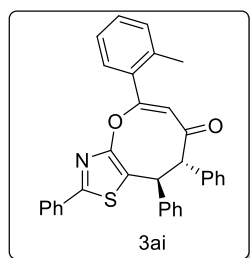

Prepared according to the general procedure using 5-alkenyl thiazolone **1a** (0.15mmol, 1.5 equiv), ynone **2i** (0.1 mmol, 1 equiv), catalyst **II** (10 mol%), 2-FC<sub>6</sub>H<sub>4</sub>COOH (30 mol%) and dry toluene (2 mL). The product **3ai** was obtained after column chromatography (hexane/EtOAc =33:1) as a white solid. **m.p.** 170-172 °C. **Yield** = 65% (32.5 mg), **d.r.** = 20:1, **ee** = 94%.

**<sup>1</sup>H NMR** (500 MHz, CDCl<sub>3</sub>) δ 8.40 (d, *J* = 7.4 Hz, 1H), 7.81 (dd, *J* = 7.0, 2.8 Hz, 2H), 7.44 – 7.35 (m, 7H), 7.30 (d, *J* = 7.5 Hz, 1H), 7.21 (t, *J* = 7.4 Hz, 3H), 7.12 (dp, *J* = 22.2, 7.2 Hz, 6H), 5.78 (s, 1H), 5.42 (d, *J* = 12.1 Hz, 1H), 4.77 (d, *J* = 12.1 Hz, 1H), 2.57 (s, 3H).

**<sup>13</sup>C NMR** (126 MHz, CDCl<sub>3</sub>) δ 201.6, 166.0, 163.1, 158.9, 141.2, 137.6, 137.0, 133.7, 133.1, 131.5, 131.0, 130.8, 130.7, 129.6, 129.1, 128.8, 128.5, 127.9, 127.7, 127.5, 126.5, 126.1, 125.3, 117.4, 61.4, 46.9, 21.9.

**HRMS (ESI-TOF) m/z:** [M+H]<sup>+</sup>calculated for C<sub>33</sub>H<sub>26</sub>NO<sub>2</sub>S: 500.1679, found 500.1687.

**HPLC Analysis:** The enantiomeric excess was determined using ChiralPAK ADH Column, *n-Hexane/i-PrOH* = 90/10, flow rate 1.0 mL/min, λ = 220 nm (*t*<sub>major</sub> = 22.85 min, *t*<sub>minor</sub> = 17.69 min).

**(8S,9S,Z)-5-(2-methoxyphenyl)-2,8,9-triphenyl-8,9-dihydro-7H-oxocino[2,3-d]thiazol-7-one (3aj)**

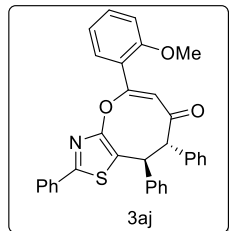

Prepared according to the general procedure using 5-alkenyl thiazolone **1a** (0.15mmol, 1.5 equiv), ynone **2j** (0.1 mmol, 1 equiv), catalyst **II** (10 mol%), 2-FC<sub>6</sub>H<sub>4</sub>COOH (30 mol%) and dry toluene (2 mL). The product **3aj** was obtained after column chromatography (hexane/EtOAc =33:1) as a white solid. **m.p.** 216-218 °C.

**Yield** = 60% (31 mg), **d.r.** = 20:1, **ee** = 80%.

**<sup>1</sup>H NMR** (500 MHz, CDCl<sub>3</sub>) δ 8.70 (d, *J* = 7.9 Hz, 1H), 7.75 – 7.68 (m, 2H), 7.42 (t, *J* = 7.9 Hz, 1H), 7.36 (d, *J* = 7.5 Hz, 2H), 7.28 (s, 3H), 7.20 – 7.07 (m, 6H), 7.04 (t, *J* = 7.5 Hz, 2H), 7.02 – 6.97 (m, 1H), 6.91 (d, *J* = 8.4 Hz, 1H), 6.62 (s, 1H), 5.53 (dd, *J* = 12.1, 2.0 Hz, 1H), 4.63 (dd, *J* = 12.2, 2.1 Hz, 1H), 3.77 (s, 3H).

**<sup>13</sup>C NMR** (126 MHz, CDCl<sub>3</sub>) δ 203.2, 162.8, 162.8, 159.4, 158.7, 141.7, 137.4, 133.1, 132.5, 131.7, 130.5, 129.9, 129.0, 128.6, 128.2, 127.9, 127.4, 127.3, 126.0, 124.9, 121.8, 121.0, 119.6, 111.3, 60.4, 55.6, 48.0.

**HRMS (ESI-TOF) m/z:** [M+H]<sup>+</sup>calculated for C<sub>33</sub>H<sub>26</sub>NO<sub>3</sub>S: 516.1628, found 516.1632.

**HPLC Analysis:** The enantiomeric excess was determined using ChiralPAK IA Column, *n-Hexane/i-PrOH* = 90/10, flow rate 1.0 mL/min, λ = 220 nm (*t*<sub>major</sub> = 57.67 min, *t*<sub>minor</sub> = 61.4 min).

**(8R,9S,Z)-2,5,9-triphenyl-8-(thiophen-2-yl)-8,9-dihydro-7H-oxocino[2,3-d]thiazol-7-one (3ak)**

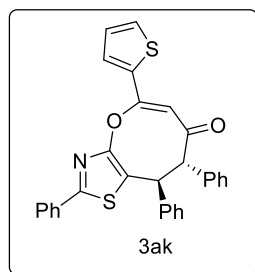

Prepared according to the general procedure using 5-alkenyl thiazolone **1a** (0.15mmol, 1.5 equiv), ynone **2k** (0.1 mmol, 1 equiv), catalyst **II** (10 mol%), 2-FC<sub>6</sub>H<sub>4</sub>COOH (30 mol%) and dry toluene (2 mL). The product **3ak** was obtained after column chromatography (hexane/EtOAc =33:1) as a white solid.

**m.p.** 196-198 °C. **Yield** = 72% (35.4 mg), **d.r.** = 20:1, **ee** = 80%.

**<sup>1</sup>H NMR** (400 MHz, CDCl<sub>3</sub>) δ 8.01 – 7.90 (m, 1H), 7.87 – 7.75 (m, 2H), 7.65 – 7.57 (m, 1H), 7.38 (td, *J* = 6.6, 5.4, 2.0 Hz, 5H), 7.25 – 7.12 (m, 8H), 7.12 – 7.06 (m, 1H), 6.13 (s, 1H), 5.54 (d, *J* = 12.3 Hz, 1H), 4.68 (d, *J* = 12.2 Hz, 1H).

**<sup>13</sup>C NMR** (126 MHz, CDCl<sub>3</sub>) δ 200.9, 163.1, 162.6, 158.7, 141.7, 138.0, 137.0, 133.0, 131.1, 130.7, 130.5, 130.0, 129.1, 128.8, 128.7, 128.2, 127.9, 127.5, 127.4, 126.0, 124.9, 112.5, 60.2, 48.0.

**HRMS (ESI-TOF) m/z:** [M+H]<sup>+</sup>calculated for C<sub>30</sub>H<sub>22</sub>NO<sub>2</sub>S<sub>2</sub>: 492.1087, found 492.1083.

**HPLC Analysis:** The enantiomeric excess was determined using ChiralPAK ADH Column, *n-Hexane/i-PrOH* = 90/10, flow rate 1.0 mL/min, λ = 220 nm (*t*<sub>major</sub> = 22.52 min, *t*<sub>minor</sub> = 18.1 min).

**(8S,9S,Z)-2,5,9-triphenyl-8-(p-tolyl)-8,9-dihydro-7H-oxocino[2,3-d]thiazol-7-one (3al)**

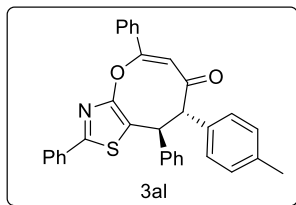

Prepared according to the general procedure using 5-alkenyl thiazolone **1a** (0.15mmol, 1.5 equiv), ynone **2l** (0.1 mmol, 1 equiv), catalyst **II** (10 mol%), 2-FC<sub>6</sub>H<sub>4</sub>COOH (30 mol%) and dry toluene (2 mL). The product **3al** was obtained after column chromatography (hexane/EtOAc =33:1) as a white solid.

**m.p.** 208-210 °C. **Yield** = 67% (33.5 mg), **d.r.** = 20:1, **ee** = 92%.

**<sup>1</sup>H NMR** (400 MHz, CDCl<sub>3</sub>) δ 8.24 – 8.13 (m, 2H), 8.00 – 7.89 (m, 1H), 7.86 – 7.77 (m, 2H), 7.57 (dd, *J* = 6.1, 2.8 Hz, 3H), 7.38 (dd, *J* = 5.2, 2.1 Hz, 3H), 7.29 – 7.20 (m, 3H), 7.17 – 7.04 (m, 4H), 6.94 (d, *J* = 7.5 Hz, 1H), 6.26 (s, 1H), 6.04 (d, *J* = 12.3 Hz, 1H), 4.80 (d, *J* = 12.1 Hz, 1H), 2.11 (s, 3H).

**<sup>13</sup>C NMR** (101 MHz, CDCl<sub>3</sub>) δ 201.6, 167.8, 163.1, 159.2, 141.5, 136.7, 135.3, 133.7, 133.0, 131.7, 130.7, 130.1, 129.4, 129.1, 128.7, 128.2, 127.9, 127.5, 127.2, 126.2, 126.1, 125.1, 114.4, 54.4, 47.2, 20.4.

**HRMS (ESI-TOF) m/z:** [M+H]<sup>+</sup>calculated for C<sub>33</sub>H<sub>26</sub>NO<sub>2</sub>S: 500.1679, found 500.1699.

**HPLC Analysis:** The enantiomeric excess was determined using ChiralPAK ADH Column, n-Hexane/*i*-PrOH = 90/10, flow rate 1.0 mL/min, λ = 220 nm (*t*<sub>major</sub> = 22.1 min, *t*<sub>minor</sub> = 12.5 min).

**(8S,9S,Z)-8-(4-methoxyphenyl)-2,5,9-triphenyl-8,9-dihydro-7H-oxocino[2,3-d]thiazol-7-one (3am)**

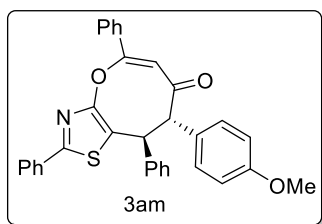

Prepared according to the general procedure using 5-alkenyl thiazolone **1a** (0.15mmol, 1.5 equiv), ynone **2m** (0.1 mmol, 1 equiv), catalyst **II** (10 mol%), 2-FC<sub>6</sub>H<sub>4</sub>COOH (30 mol%) and dry toluene (2 mL). The product **3am** was obtained after column chromatography (hexane/EtOAc =33:1) as a white solid.

**m.p.** 217-219 °C.

**Yield** = 62% (32 mg), **d.r.** = 20:1, **ee** = 90%.

**<sup>1</sup>H NMR** (400 MHz, CDCl<sub>3</sub>) δ 8.25 – 8.16 (m, 2H), 7.86 – 7.78 (m, 2H), 7.56 (h, *J* = 2.3 Hz, 3H), 7.42 – 7.30 (m, 5H), 7.21 – 7.09 (m, 5H), 6.80 – 6.74 (m, 2H), 6.24 (s, 1H), 5.50 (d, *J* = 12.1 Hz, 1H), 4.67 (d, *J* = 12.1 Hz, 1H), 3.74 (s, 3H).

**<sup>13</sup>C NMR** (101 MHz, CDCl<sub>3</sub>) δ 202.3, 167.7, 163.0, 159.2, 159.0, 141.7, 133.6, 133.0, 131.6, 130.8, 130.6, 129.2, 129.0, 128.7, 128.2, 127.9, 127.4, 126.0, 124.9, 114.1, 113.7, 59.6, 55.3, 47.9.

**HRMS (ESI-TOF) m/z:** [M+H]<sup>+</sup>calculated for C<sub>33</sub>H<sub>26</sub>NO<sub>3</sub>S: 516.1628, found 516.1664.

**HPLC Analysis:** The enantiomeric excess was determined using ChiralPAK ADH Column, n-Hexane/*i*-PrOH = 90/10, flow rate 1.0 mL/min, λ = 220 nm (*t*<sub>major</sub> = 26.38 min, *t*<sub>minor</sub> = 19.0 min).

**(8S,9S,Z)-8-(4-fluorophenyl)-2,5,9-triphenyl-8,9-dihydro-7H-oxocino[2,3-d]thiazol-7-one (3an)**

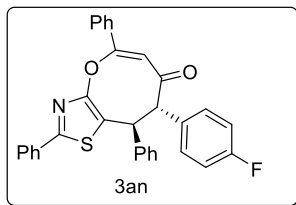

Prepared according to the general procedure using 5-alkenyl thiazolone **1a** (0.15mmol, 1.5 equiv), ynone **2n** (0.1 mmol, 1 equiv), catalyst **II** (10 mol%), 2-FC<sub>6</sub>H<sub>4</sub>COOH (30 mol%) and dry toluene (2 mL). The product **3an** was obtained after column chromatography (hexane/EtOAc =33:1) as a white solid.

**m.p.** 185-187 °C. **Yield** = 61% (30.7 mg), **d.r.** = 20:1, **ee** = 92%.

**<sup>1</sup>H NMR** (400 MHz, CDCl<sub>3</sub>) δ 8.31 (dt, *J* = 6.6, 3.4 Hz, 2H), 7.97 – 7.86 (m, 2H), 7.73 – 7.61 (m, 3H), 7.49 (q, *J* = 6.6, 6.1 Hz, 5H), 7.26 (d, *J* = 9.1 Hz, 5H), 7.01 (td, *J* = 8.8, 2.9 Hz, 2H), 6.43 – 6.29 (m, 1H), 5.66 (dt, *J* = 12.1, 3.8 Hz, 1H), 4.74 (dt, *J* = 12.3, 4.3 Hz, 1H).

**<sup>13</sup>C NMR** (101 MHz, CDCl<sub>3</sub>) δ 201.7, 168.2, 163.6, 163.1, 161.1, 159.3, 141.5, 141.5, 133.5, 132.9, 132.9, 131.8, 131.4, 131.3, 130.7, 129.1, 128.8, 128.2, 127.8, 127.5, 126.0, 124.6, 115.2, 115.0, 114.1, 114.1, 59.5, 48.2.

**HRMS (ESI-TOF) m/z:** [M+H]<sup>+</sup>calculated for C<sub>32</sub>H<sub>23</sub>FNO<sub>2</sub>S: 504.1429, found 504.1404.

**HPLC Analysis:** The enantiomeric excess was determined using ChiralPAK IA Column, *n*-Hexane/*i*-PrOH = 90/10, flow rate 1.0 mL/min, λ = 220 nm (*t*<sub>major</sub> = 14.29 min, *t*<sub>minor</sub> = 10.4 min).

**(8S,9S,Z)-2,5,9-triphenyl-8-(*m*-tolyl)-8,9-dihydro-7H-oxocino[2,3-*d*]thiazol-7-one (**3ao**)**

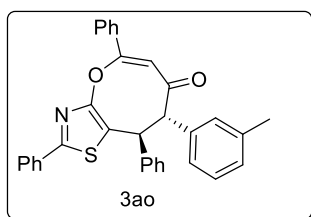

Prepared according to the general procedure using 5-alkenyl thiazolone **1a** (0.15mmol, 1.5 equiv), ynone **2o** (0.1 mmol, 1 equiv), catalyst **II** (10 mol%), 2-FC<sub>6</sub>H<sub>4</sub>COOH (30 mol%) and dry toluene (2 mL). The product **3ao** was obtained after column chromatography (hexane/EtOAc =33:1) as a white solid.

**m.p.** 186-188 °C. **Yield** = 59% (29.5 mg), **d.r.** = 20:1, **ee** = 90%.

**<sup>1</sup>H NMR** (500 MHz, CDCl<sub>3</sub>) δ 8.29 – 8.21 (m, 2H), 7.87 (dd, *J* = 7.3, 2.4 Hz, 2H), 7.65 – 7.57 (m, 3H), 7.43 (dt, *J* = 5.4, 2.6 Hz, 3H), 7.31 – 7.23 (m, 4H), 7.20 (t, *J* = 7.6 Hz, 2H), 7.15 (dd, *J* = 7.4, 1.9 Hz, 2H), 7.04 (d, *J* = 7.5 Hz, 1H), 6.30 (d, *J* = 2.0 Hz, 1H), 5.59 (dd, *J* = 12.2, 2.4 Hz, 1H), 4.79 (dd, *J* = 12.2, 2.5 Hz, 1H), 2.33 (s, 3H).

**<sup>13</sup>C NMR** (126 MHz, CDCl<sub>3</sub>) δ 201.9, 167.7, 163.0, 159.2, 141.7, 137.8, 136.9, 133.7, 133.0, 131.6, 130.7, 130.5, 129.0, 129.0, 128.7, 128.3, 128.2, 128.1, 127.9, 127.4, 126.9, 126.0, 125.1, 114.0, 60.4, 47.5, 21.6.

**HRMS (ESI-TOF) m/z:** [M+H]<sup>+</sup>calculated for C<sub>33</sub>H<sub>26</sub>NO<sub>2</sub>S: 500.1679, found 500.1692.

**HPLC Analysis:** The enantiomeric excess was determined using ChiralPAK ADH Column, *n*-Hexane/*i*-PrOH = 90/10, flow rate 1.0 mL/min, λ = 220 nm (*t*<sub>major</sub> = 17.47 min, *t*<sub>minor</sub> = 11.38 min).

**(8S,9S,Z)-2,5,9-triphenyl-8-(*o*-tolyl)-8,9-dihydro-7H-oxocino[2,3-*d*]thiazol-7-one (**3ap**)**

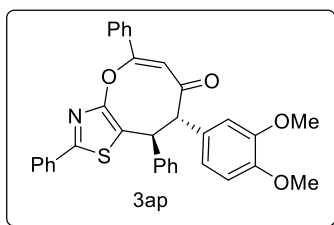

Prepared according to the general procedure using 5-alkenyl thiazolone **1a** (0.15mmol, 1.5 equiv), ynone **2p** (0.1 mmol, 1 equiv), catalyst **II** (10 mol%), 2-FC<sub>6</sub>H<sub>4</sub>COOH (30 mol%) and dry toluene (2 mL). The product **3ap** was obtained after column chromatography (hexane/EtOAc =33:1) as a white solid. **m.p.** 242-244 °C.

**Yield** = 71% (38.7 mg), **d.r.** = 20:1, **ee** = 80%.

**<sup>1</sup>H NMR** (400 MHz, CDCl<sub>3</sub>) δ 8.24 – 8.15 (m, 2H), 7.85 – 7.80 (m, 2H), 7.59 – 7.52 (m, 3H), 7.38 (dd, *J* = 5.1, 1.9 Hz, 3H), 7.15 (d, *J* = 4.6 Hz, 4H), 7.13 – 7.08 (m, 1H), 7.01 (d, *J* = 2.1 Hz, 1H), 6.89 (dd, *J* = 8.3, 2.1 Hz, 1H), 6.68 (d, *J* = 8.4 Hz, 1H), 6.25 (s, 1H), 5.45 (d, *J* = 12.1 Hz, 1H), 4.63 (d, *J* = 12.1 Hz, 1H), 3.83 (d, *J* = 14.5 Hz, 6H).

**<sup>13</sup>C NMR** (101 MHz, CDCl<sub>3</sub>) δ 202.3, 167.8, 163.1, 159.3, 148.7, 148.5, 141.6, 133.6, 133.0, 131.7, 130.7, 129.6, 129.1, 129.1, 128.7, 128.2, 127.9, 127.4, 126.0, 124.8, 122.3, 114.1, 112.9, 110.8, 59.9, 56.2, 55.9, 48.2.

**HRMS (ESI-TOF) m/z:** [M+H]<sup>+</sup>calculated for C<sub>34</sub>H<sub>28</sub>NO<sub>4</sub>S: 546.1734, found 546.1754.

**HPLC Analysis:** The enantiomeric excess was determined using ChiralPAK ADH Column, *n*-Hexane/*i*-PrOH = 90/10, flow rate 1.0 mL/min, λ = 220 nm (*t*<sub>major</sub> = 32.78 min, *t*<sub>minor</sub> = 26.2 min).

**(8S,9S,Z)-8-(naphthalen-1-yl)-2,5,9-triphenyl-8,9-dihydro-7H-oxocino[2,3-d]thiazol-7-one (3aq)**

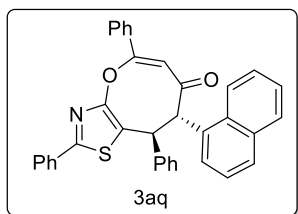

Prepared according to the general procedure using 5-alkenyl thiazolone **1a** (0.15mmol, 1.5 equiv), ynone **2q** (0.1 mmol, 1 equiv), catalyst **II** (10 mol%), 2-FC<sub>6</sub>H<sub>4</sub>COOH (30 mol%) and dry toluene (2 mL). The product **3aq** was obtained after column chromatography (hexane/EtOAc =33:1) as a white solid.

**m.p.** 230-232 °C. **Yield** = 78% (41.8 mg), **d.r.** = 20:1, **ee** = 89%.

**<sup>1</sup>H NMR** (500 MHz, CDCl<sub>3</sub>) δ 8.24 (dd, *J* = 6.7, 3.0 Hz, 2H), 7.84 (d, *J* = 8.7 Hz, 3H), 7.77 (dd, *J* = 9.3, 5.9 Hz, 3H), 7.71 (d, *J* = 8.7 Hz, 1H), 7.62 – 7.56 (m, 3H), 7.46 – 7.36 (m, 5H), 7.25 (d, *J* = 7.8 Hz, 2H), 7.11 (t, *J* = 7.6 Hz, 2H), 7.06 (d, *J* = 7.2 Hz, 1H), 6.30 (s, 1H), 5.79 (d, *J* = 12.2 Hz, 1H), 4.91 (d, *J* = 12.1 Hz, 1H).

**<sup>13</sup>C NMR** (126 MHz, CDCl<sub>3</sub>) δ 201.8, 168.0, 163.1, 159.2, 141.5, 134.6, 133.6, 133.3, 133.0, 132.9, 131.7, 130.7, 129.1, 129.0, 128.8, 128.2, 128.1, 127.9, 127.7, 127.5, 127.5, 126.0, 126.0, 126.0, 125.0, 114.1, 60.5, 47.6.

**HRMS (ESI-TOF) m/z:** [M+H]<sup>+</sup>calculated for C<sub>36</sub>H<sub>25</sub>NO<sub>2</sub>S: 536.1679, found 536.1699.

**HPLC Analysis:** The enantiomeric excess was determined using ChiralPAK IA Column, *n*-Hexane/*i*-PrOH = 90/10, flow rate 1.0 mL/min, λ = 220 nm (*t*<sub>major</sub> = 24.5 min, *t*<sub>minor</sub> = 17.8 min).

**(8R,9S,Z)-8-methyl-2,5,9-triphenyl-8,9-dihydro-7H-oxocino[2,3-d]thiazol-7-one (3ar)**

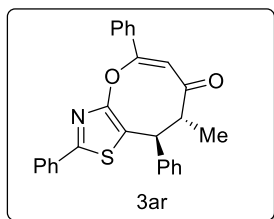

Prepared according to the general procedure using 5-alkenyl thiazolone **1a** (0.15mmol, 1.5 equiv), ynone **2r** (0.1 mmol, 1 equiv), catalyst **II** (10 mol%), 2-FC<sub>6</sub>H<sub>4</sub>COOH (30 mol%) and dry toluene (2 mL). The product **3ar** was obtained after column chromatography (hexane/EtOAc =33:1) as a white solid. **m.p.** 186-

188 °C. **Yield** = 73% (31 mg), **d.r.** = 20:1, **ee** = 94%.

**<sup>1</sup>H NMR** (400 MHz, CDCl<sub>3</sub>) δ 8.24 – 8.17 (m, 2H), 7.82 – 7.75 (m, 2H), 7.58 – 7.52 (m, 3H), 7.42 – 7.31 (m, 7H), 7.31 – 7.24 (m, 1H), 6.28 (s, 1H), 4.40 (dq, *J* = 11.4, 6.5 Hz, 1H), 4.00 (d, *J* = 11.6 Hz, 1H), 1.07 (d, *J* = 6.5 Hz, 3H).

**<sup>13</sup>C NMR** (101 MHz, CDCl<sub>3</sub>) δ 204.7, 168.6, 162.7, 159.2, 142.6, 133.7, 133.0, 131.7, 130.6, 129.1, 129.0, 128.2, 128.0, 127.7, 126.0, 125.4, 114.3, 48.0, 48.0, 16.1.

**HRMS (ESI-TOF) m/z:** [M+H]<sup>+</sup>calculated for C<sub>27</sub>H<sub>21</sub>NO<sub>2</sub>S: 424.1366, found 424.1392.

**HPLC Analysis:** The enantiomeric excess was determined using ChiralPAK ADH Column, *n*-Hexane/*i*-PrOH = 90/10, flow rate 1.0 mL/min, λ = 220 nm (*t*<sub>major</sub> = 8.07 min, *t*<sub>minor</sub> = 12.2 min).

**(S, Z)-2,5,9-triphenyl-8,9-dihydro-7H-oxocino[2,3-d]thiazol-7-one (3as)**

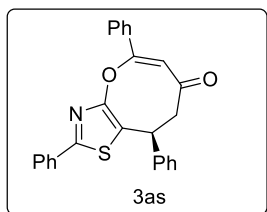

Prepared according to the general procedure using 5-alkenyl thiazolone **1a** (0.15mmol, 1.5 equiv), ynone **2s** (0.1 mmol, 1 equiv), catalyst **II** (10 mol%), 2-FC<sub>6</sub>H<sub>4</sub>COOH (30 mol%) and dry toluene (2 mL). The product **3as** was obtained after column chromatography (hexane/EtOAc =33:1) as a white solid. **m.p.** 154-

156 °C. **Yield** = 78% (32 mg), **d.r.** = 20:1, **ee** = 84%.

**<sup>1</sup>H NMR** (500 MHz, CDCl<sub>3</sub>) δ 8.27 – 8.21 (m, 2H), 7.85 – 7.77 (m, 2H), 7.59 – 7.51 (m, 3H), 7.42 – 7.32 (m, 7H), 7.28 (s, 1H), 6.35 (s, 1H), 4.53 (dd, *J* = 12.6, 5.1 Hz, 1H), 4.18 (t, *J* = 11.9 Hz, 1H), 2.95 (dd, *J* = 11.5, 5.1 Hz, 1H).

**<sup>13</sup>C NMR** (126 MHz, CDCl<sub>3</sub>) δ 199.9, 169.3, 163.0, 159.9, 143.7, 133.6, 133.1, 131.9, 130.7, 129.3, 129.1, 129.0, 128.4, 127.7, 127.4, 126.0, 124.0, 115.0, 48.2, 41.8.

**HRMS (ESI-TOF) m/z:** [M+H]<sup>+</sup>calculated for C<sub>26</sub>H<sub>20</sub>NO<sub>2</sub>S: 410.1210, found 410.1227.

**HPLC Analysis:** The enantiomeric excess was determined using ChiralPAK ADH Column, *n*-Hexane/*i*-PrOH = 90/10, flow rate 1.0 mL/min, λ = 220 nm (*t*<sub>major</sub> = 9.8 min, *t*<sub>minor</sub> = 13.35 min).

**(8S,9S,E)-6-chloro-2,5,8,9-tetraphenyl-8,9-dihydro-7H-oxocino[2,3-d]thiazol-7-one (4)**

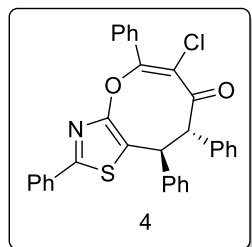

White solid, **m.p.** 246-248 °C. **Yield** = 74% (38.5 mg), >20:1 dr, **ee** = 88%

**<sup>1</sup>H NMR** (500 MHz, CDCl<sub>3</sub>) δ 8.50 – 8.45 (m, 2H), 7.89 – 7.83 (m, 2H), 7.63 – 7.57 (m, 3H), 7.43 (td, *J* = 6.1, 4.9, 2.0 Hz, 5H), 7.23 (d, *J* = 7.2 Hz, 3H), 7.11 (s, 4H), 5.60 (d, *J* = 12.0 Hz, 1H), 4.73 (d, *J* = 12.0 Hz, 1H).

**<sup>13</sup>C NMR** (126 MHz, CDCl<sub>3</sub>) δ 197.8, 165.1, 163.5, 159.6, 140.8, 136.7, 132.9, 132.7, 131.9, 131.5, 130.9, 129.9, 129.2, 128.7, 128.5, 128.5, 127.9, 127.6, 126.1, 124.8, 121.7, 60.2, 48.3.

**HRMS (ESI-TOF) m/z:** [M+H]<sup>+</sup>calculated for C<sub>32</sub>H<sub>23</sub>ClNO<sub>2</sub>S: 520.1133, found 520.1134.

**HPLC Analysis:** The enantiomeric excess was determined using ChiralPAK IA Column, *n-Hexane/i-PrOH* = 90/10, flow rate 1.0 mL/min, λ = 220 nm (*t*<sub>major</sub> = 9.63 min, *t*<sub>minor</sub> = 17.03 min).

**(7S,8S,9S,Z)-2,5,8,9-tetraphenyl-8,9-dihydro-7H-oxocino[2,3-d]thiazol-7-ol (5)**

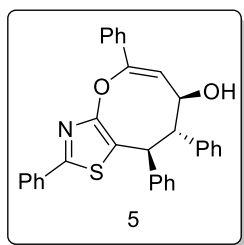

White solid, **m.p.** 148-150 °C. **Yield** = 88% (42.9 mg), >20:1 dr, **ee** = 82%

**<sup>1</sup>H NMR** (400 MHz, CDCl<sub>3</sub>) δ 7.86 (td, *J* = 7.3, 6.8, 2.0 Hz, 4H), 7.50 – 7.38 (m, 6H), 7.35 – 7.30 (m, 2H), 7.26 (td, *J* = 9.3, 7.9, 4.5 Hz, 7H), 7.22 – 7.16 (m, 2H), 5.36 (d, *J* = 8.3 Hz, 1H), 5.19 (d, *J* = 8.6 Hz, 1H), 5.00 (d, *J* = 11.8 Hz, 1H), 3.72

(dd, *J* = 11.8, 5.8 Hz, 1H).

**<sup>13</sup>C NMR** (101 MHz, CDCl<sub>3</sub>) δ 162.6, 155.7, 148.9, 140.8, 137.6, 135.2, 133.2, 130.3, 129.9, 129.1, 129.0, 128.9, 128.8, 128.7, 127.6, 127.6, 126.0, 125.9, 117.2, 107.3, 68.7, 49.3, 44.8.

**HRMS (ESI-TOF) m/z:** [M+H]<sup>+</sup>calculated for C<sub>32</sub>H<sub>26</sub>NO<sub>2</sub>S: 488.1679, found 488.1679.

**HPLC Analysis:** The enantiomeric excess was determined using ChiralPAK ADH Column, *n-Hexane/i-PrOH* = 90/10, flow rate 1.0 mL/min, λ = 220 nm (*t*<sub>major</sub> = 22.28 min, *t*<sub>minor</sub> = 57.57 min).

**(8R,9S,Z)-7-methylene-2,5,8,9-tetraphenyl-8,9-dihydro-7H-oxocino[2,3-d]thiazole (6)**

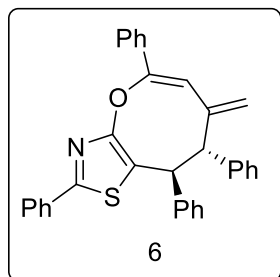

White solid, **m.p.** 188-190 °C. **Yield** = 72% (34.9 mg), >20:1 dr, **ee** = 94%

**<sup>1</sup>H NMR** (400 MHz, DMSO) δ 8.12 – 8.04 (m, 2H), 7.82 – 7.75 (m, 2H), 7.53 (t, *J* = 7.6 Hz, 2H), 7.46 (td, *J* = 10.5, 10.1, 4.4 Hz, 8H), 7.20 (td, *J* = 7.6, 6.0 Hz, 4H), 7.13 – 7.04 (m, 2H), 6.61 (s, 1H), 5.27 (s, 1H), 5.17 (d, *J* = 4.0 Hz, 3H).

**<sup>13</sup>C NMR** (101 MHz, DMSO) δ 161.3, 156.7, 152.9, 146.6, 143.6, 141.9, 135.1, 132.5, 130.7, 129.4, 129.2, 128.8, 128.6, 128.3, 127.7, 126.9, 126.5, 126.3, 126.2, 125.4, 120.6, 115.1, 52.0, 46.4.

**HRMS (ESI-TOF) m/z:**  $[M+H]^+$  calculated for  $C_{33}H_{26}NO_2S$ : 484.1730, found 484.1732.

**HPLC Analysis:** The enantiomeric excess was determined using ChiralPAK ADH Column, *n*-Hexane/*i*-PrOH = 90/10, flow rate 1.0 mL/min,  $\lambda = 220$  nm ( $t_{major} = 5.29$  min,  $t_{minor} = 13.64$  min).

## 8. Scale-up reaction for compound **3aa**

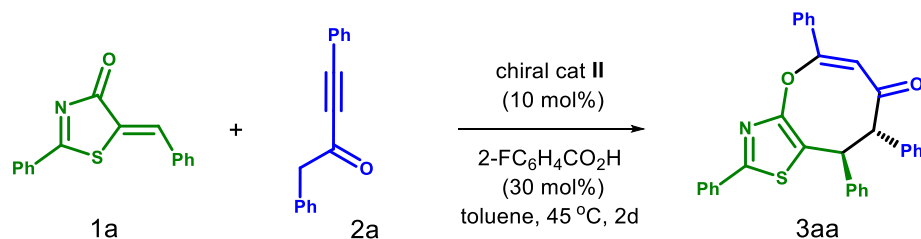

Under an argon atmosphere, an oven dried round bottom flask was charged with cat. **II** (67.8 mg, 10 mol %), 2-FC<sub>6</sub>H<sub>4</sub>COOH (84 mg, 30 mol %). After the flask was evacuated and backfilled with argon, dry toluene (2.0 mL) was added, then stirred at rt for 30 minutes. Then 5-alkenyl thiazolones **1a** (660 mg, 3 mmol, 1.5 equiv) and ynones **2a** (530mg, 2 mmol, 1 equiv) were added sequentially. The reaction mixture was stirred at 45 °C for 2 days. After the completion of reaction, mixture was directly purified by flash column chromatography on silica gel with hexane/ethyl acetate (33:1) to afford desired product **3aa**.

**Yield** = 58% (562.2 mg), **ee** = 91%

## 9. Single crystal X-ray diffraction analysis:

### Method for crystal growth:

In a round bottom flask, compound **3pa** dissolved in minimum amount of hexane/DCM (3:1) and it kept in dark place at room temperature for slow evaporation to get colourless crystal of compound **3pa**. X-ray crystallographic data were collected using Bruker D8 QUEST diffractometer. Data refinement and cell reduction were carried out by APEX4. Structures were solved by direct methods using Olex2 v1.5 and refined by a full-matrix least-squares method using Olex2 v1.5. The ORTEP diagram was obtained with ORTEP3 software with 30% thermal ellipsoid. The crystallographic parameters and refinement data are:

|                          |                                                     |
|--------------------------|-----------------------------------------------------|
| CCDC No.                 | <b>2516428</b>                                      |
| Empirical formula        | C <sub>32</sub> H <sub>22</sub> BrNO <sub>2</sub> S |
| Formula weight           | 564.4970                                            |
| Crystal habit, colour    | Needle, clear colourless                            |
| Temperature, (T)         | 297 K                                               |
| Bond precision           | C-C = 0.0115 Å                                      |
| Wavelength ( $\lambda$ ) | 0.71073 Å                                           |



# 10. <sup>1</sup>H NMR and <sup>13</sup>C NMR spectra:

## (Z)-2,5,8,9-tetraphenyl-8,9-dihydro-7H-oxocino[2,3-d]thiazol-7-one (3aa)

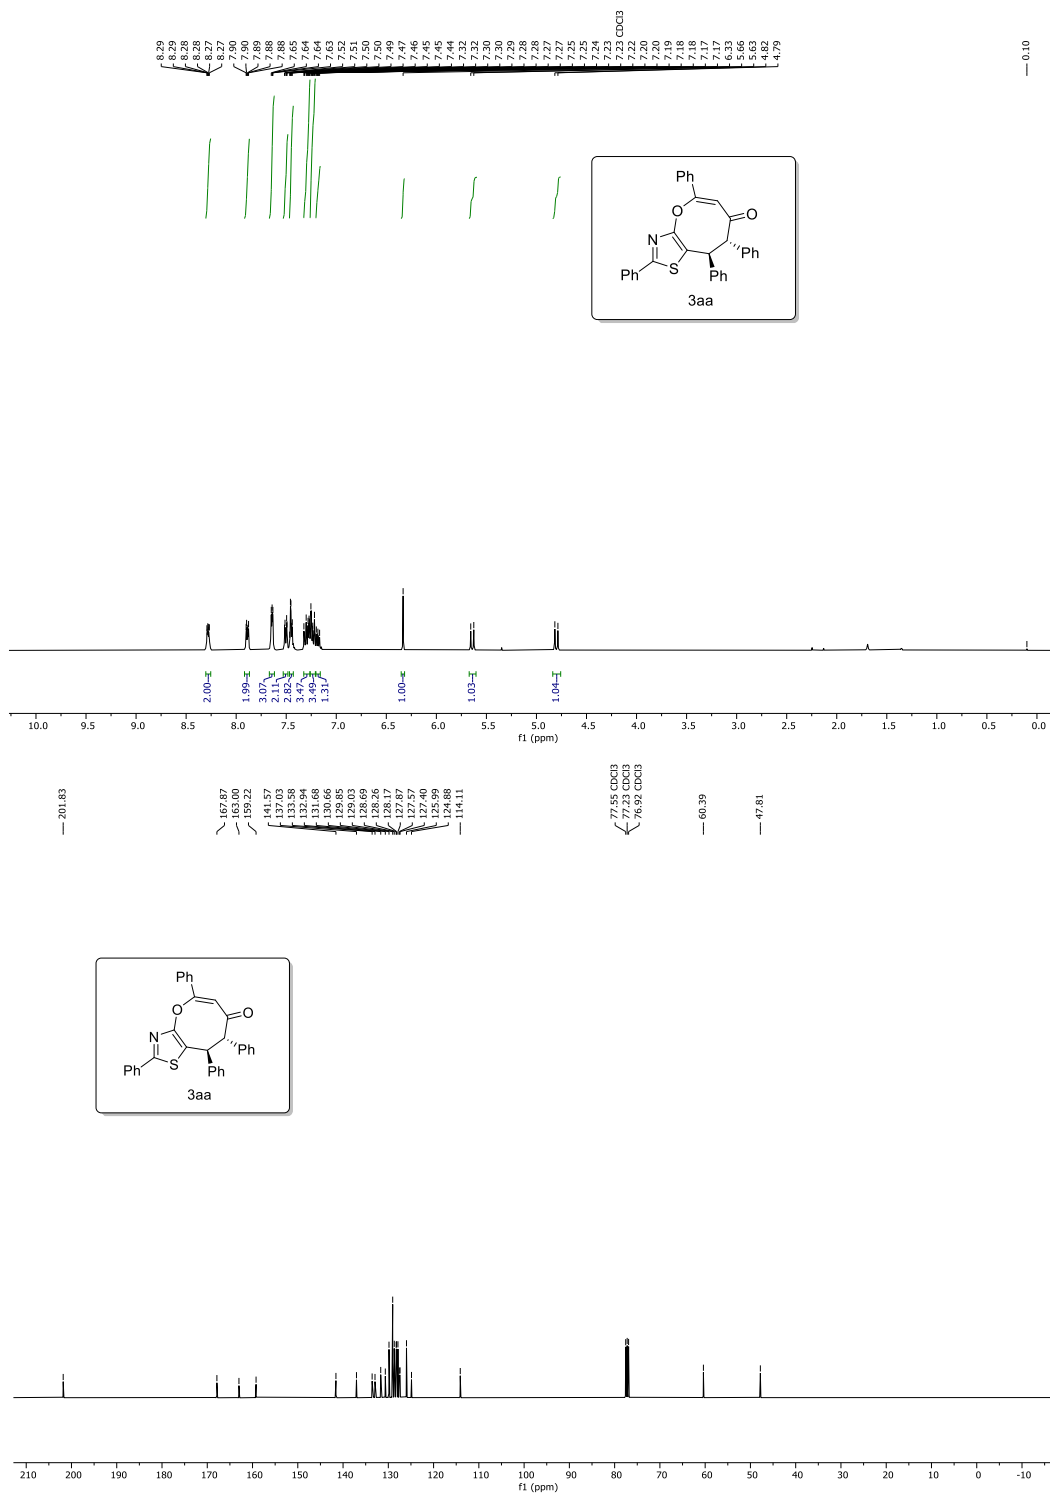

**(Z)-2,5,8-triphenyl-9-(p-tolyl)-8,9-dihydro-7H-oxocino[2,3-d]thiazol-7-one (3ba)**

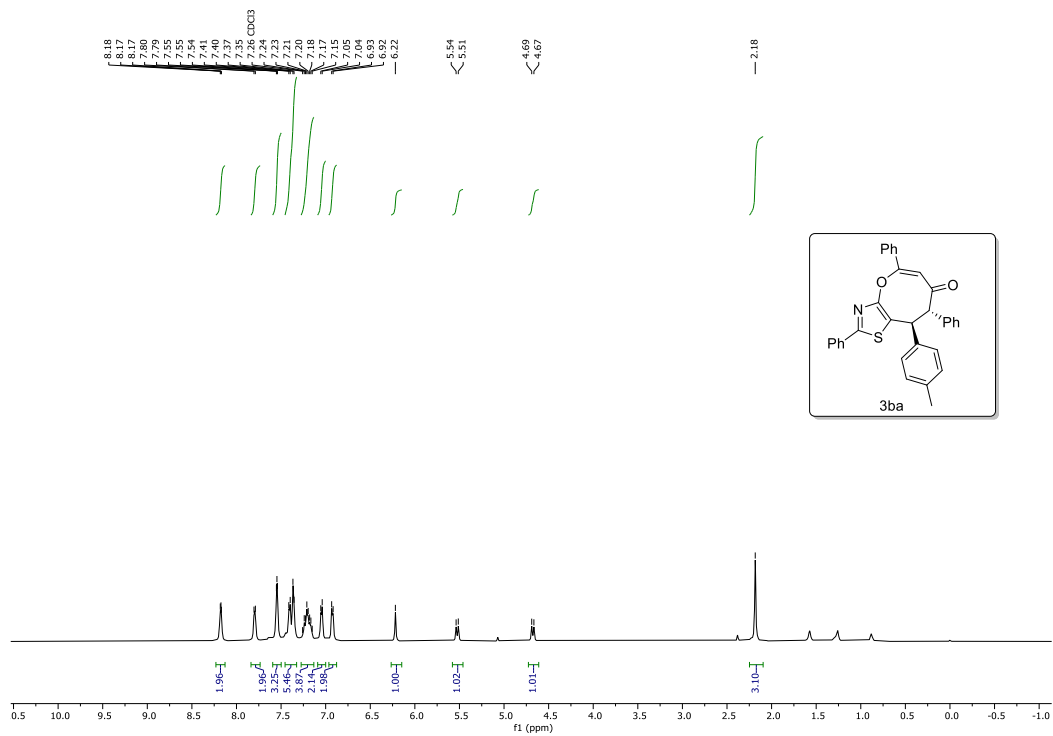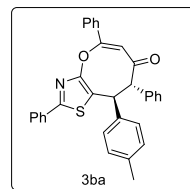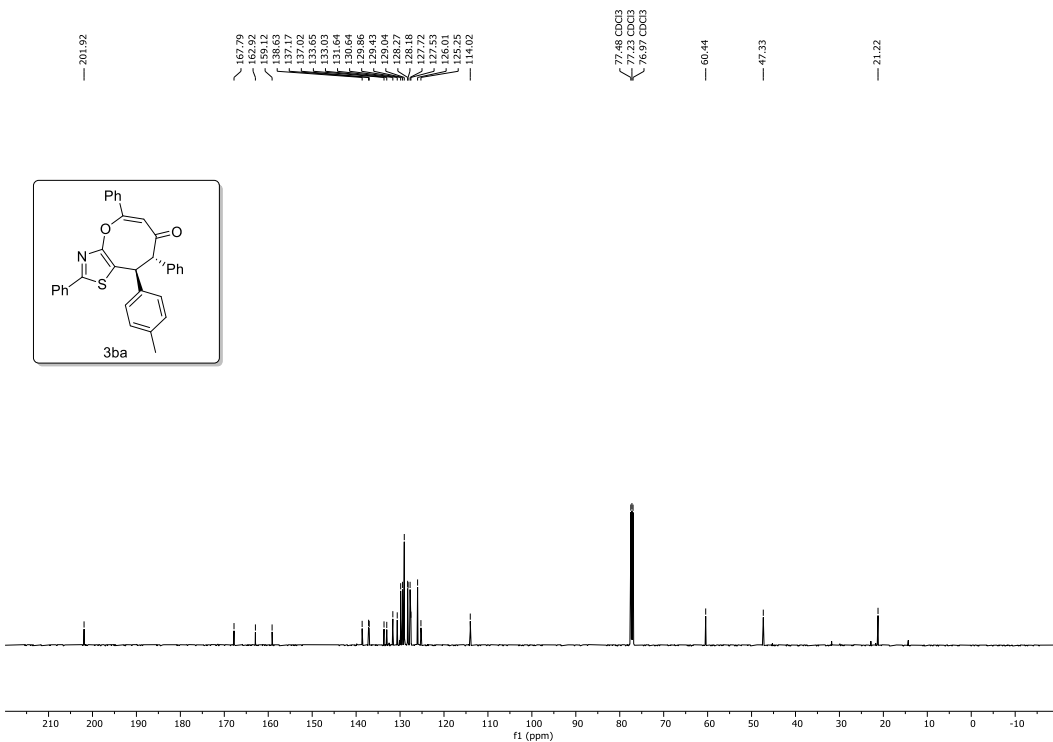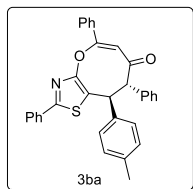

**(Z)-9-(4-methoxyphenyl)-2,5,8-triphenyl-8,9-dihydro-7H-oxocino[2,3-d]thiazol-7-one (3ca)**

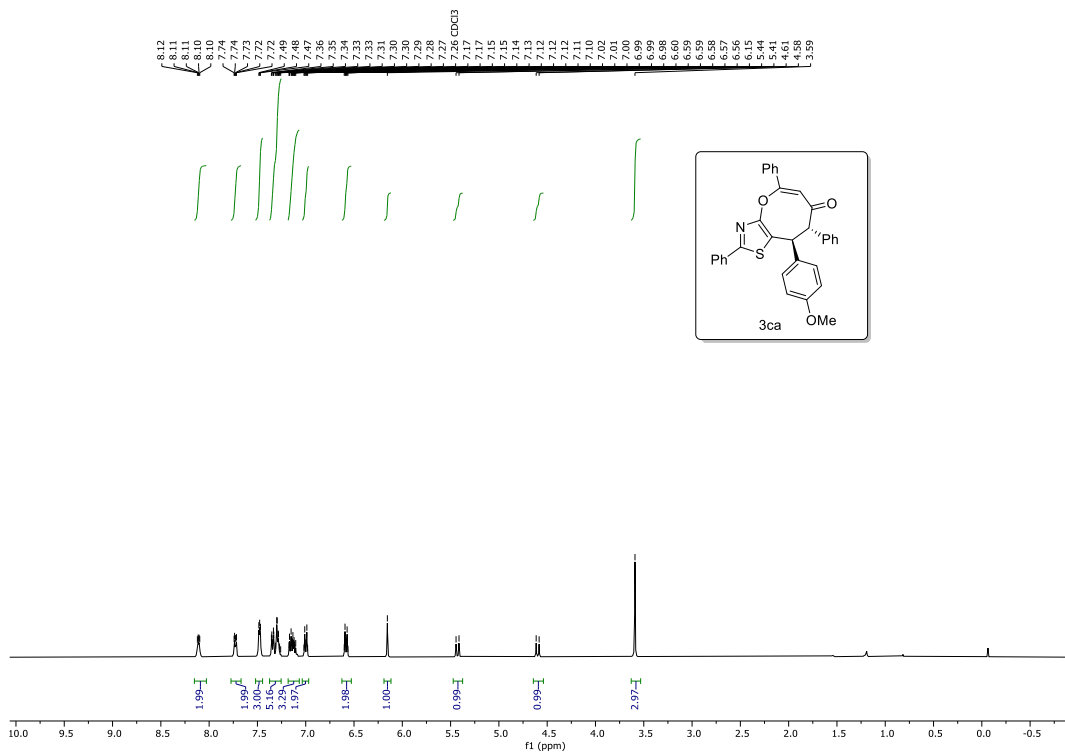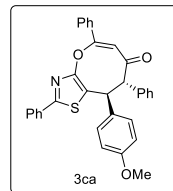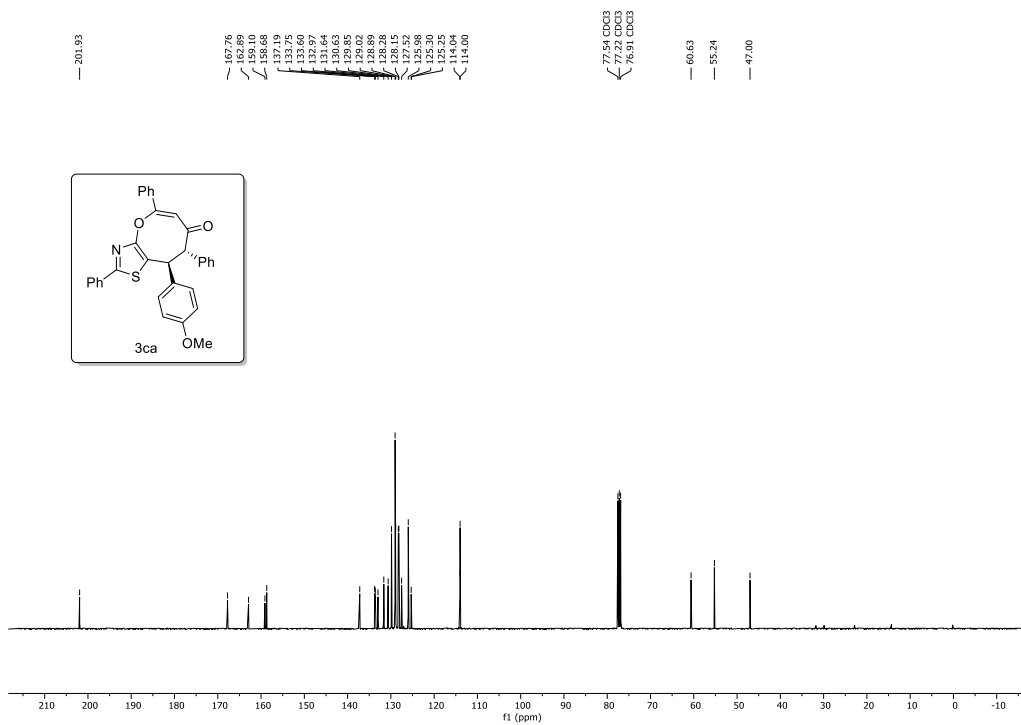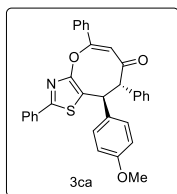

**(Z)-9-(4-fluorophenyl)-2,5,8-triphenyl-8,9-dihydro-7H-oxocino[2,3-d]thiazol-7-one (3da)**

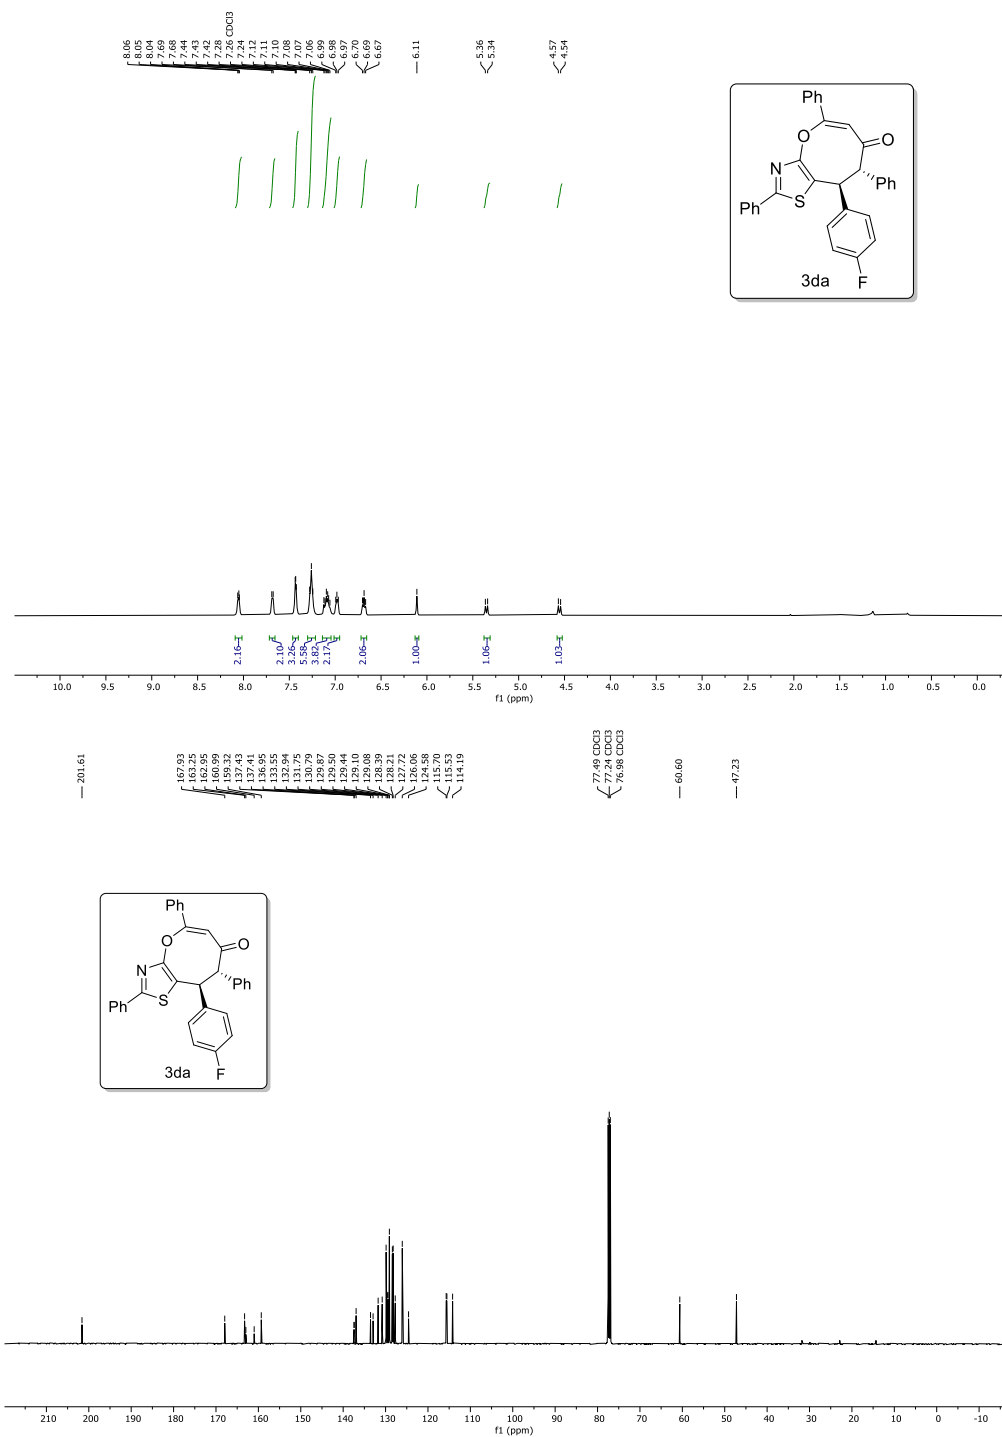

**(Z)-9-(4-chlorophenyl)-2,5,8-triphenyl-8,9-dihydro-7H-oxocino[2,3-d]thiazol-7-one (3ea)**

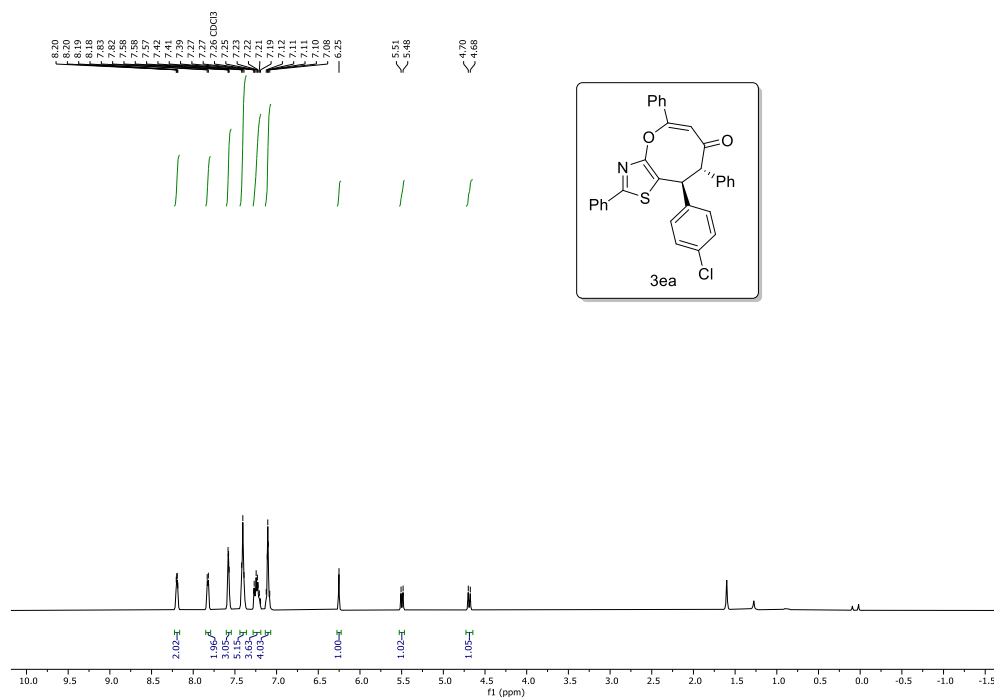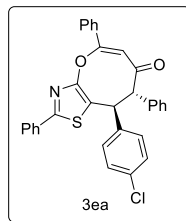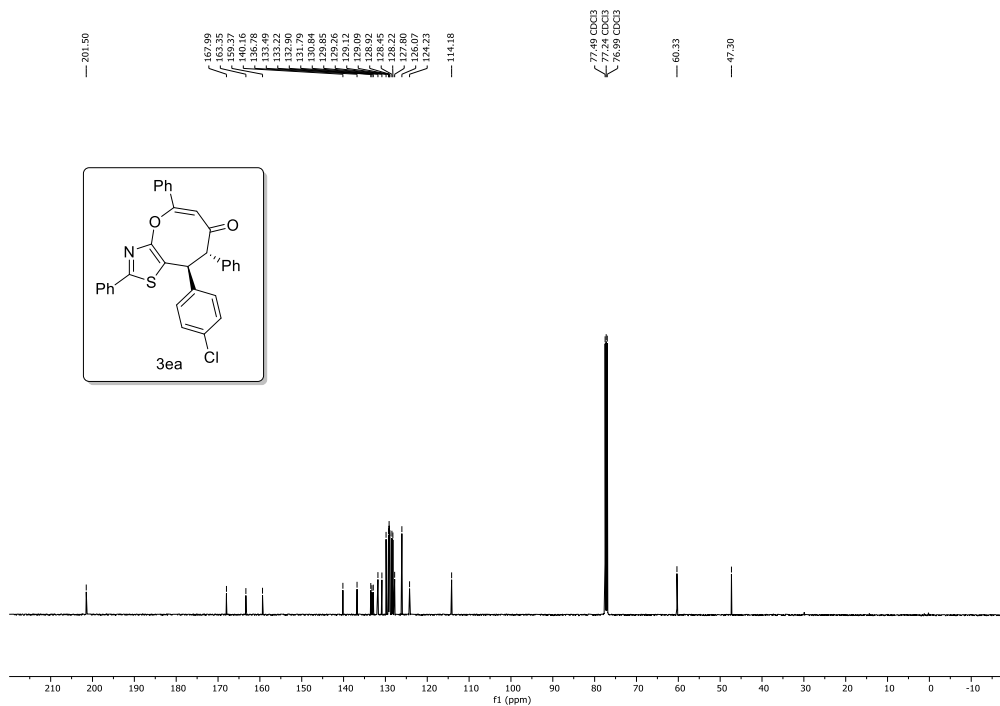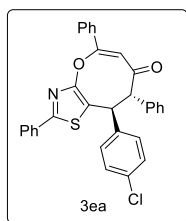

**(Z)-9-(4-bromophenyl)-2,5,8-triphenyl-8,9-dihydro-7H-oxocino[2,3-d]thiazol-7-one (3fa)**

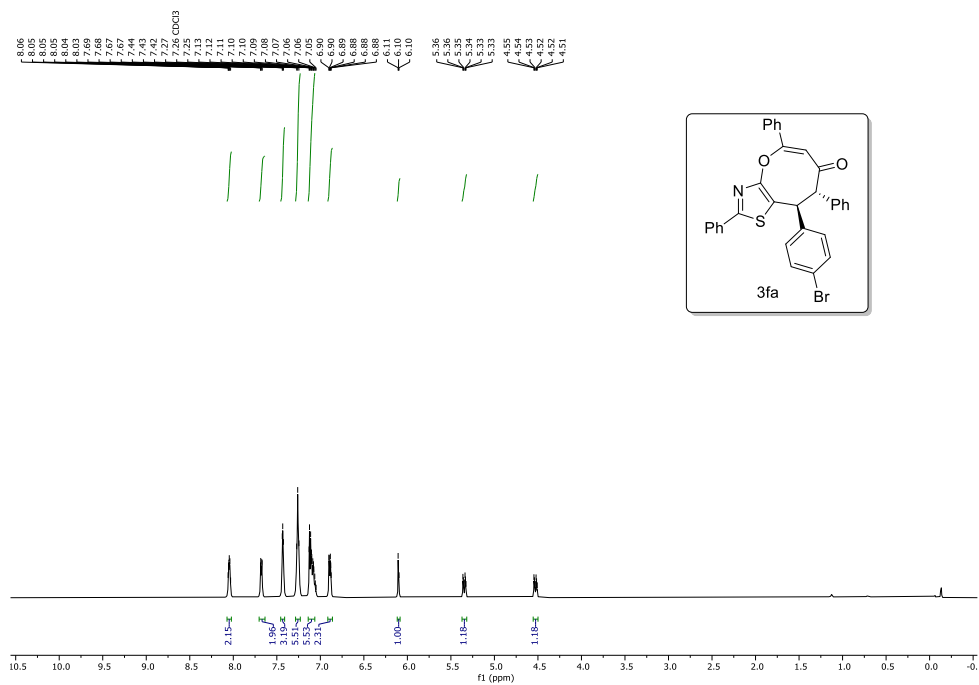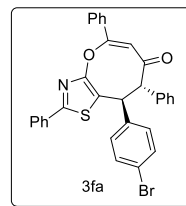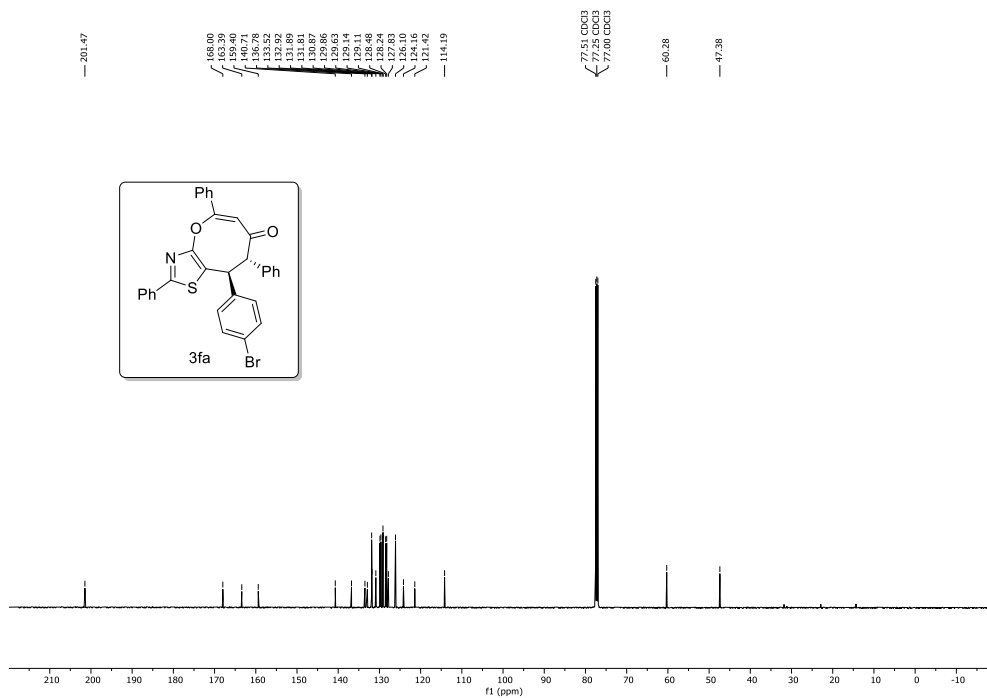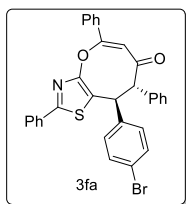



(Z)-9-(3-fluorophenyl)-2,5,8-triphenyl-8,9-dihydro-7H-oxocino[2,3-d]thiazol-7-one (3ha)

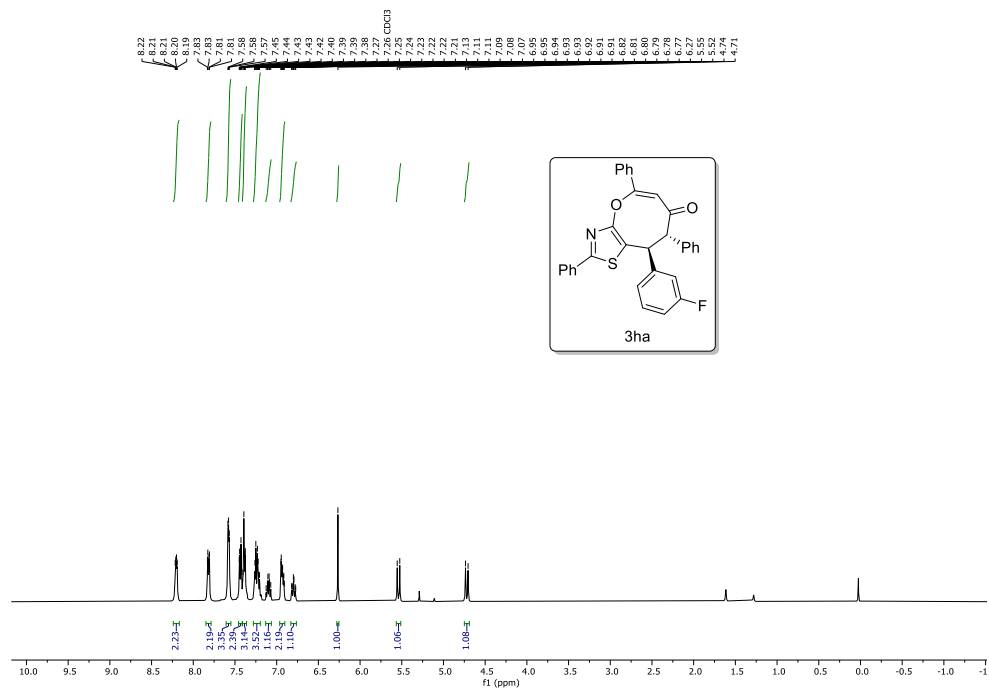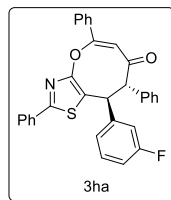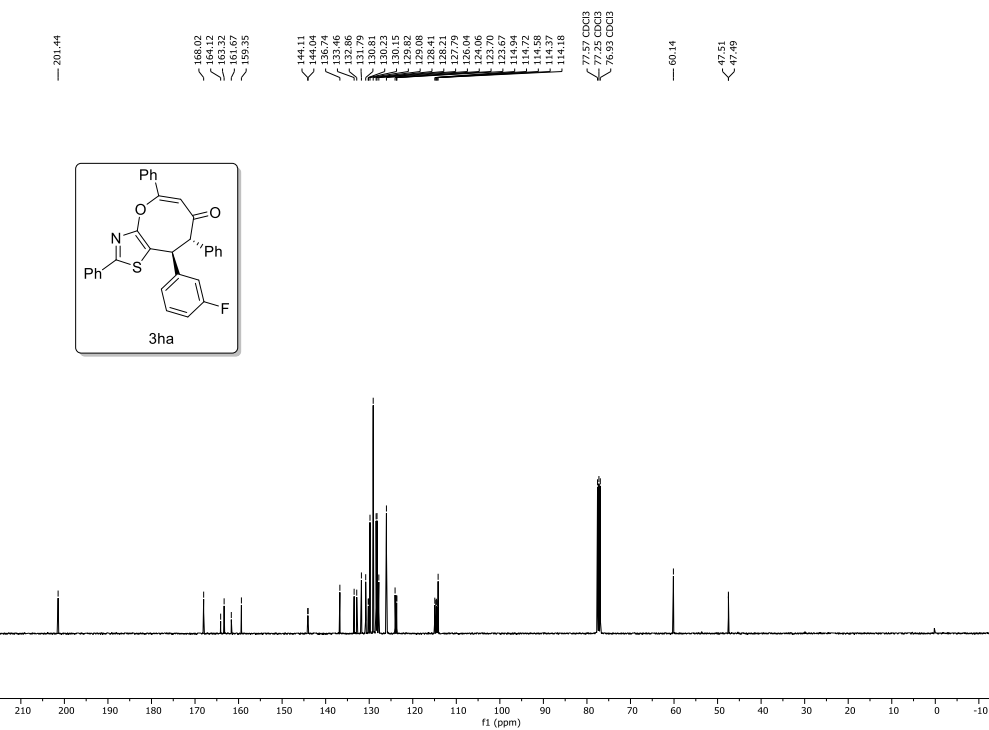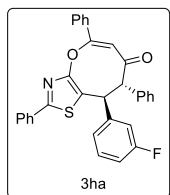

**(Z)-9-(3-chlorophenyl)-2,5,8-triphenyl-8,9-dihydro-7H-oxocino[2,3-d]thiazol-7-one (3ia)**

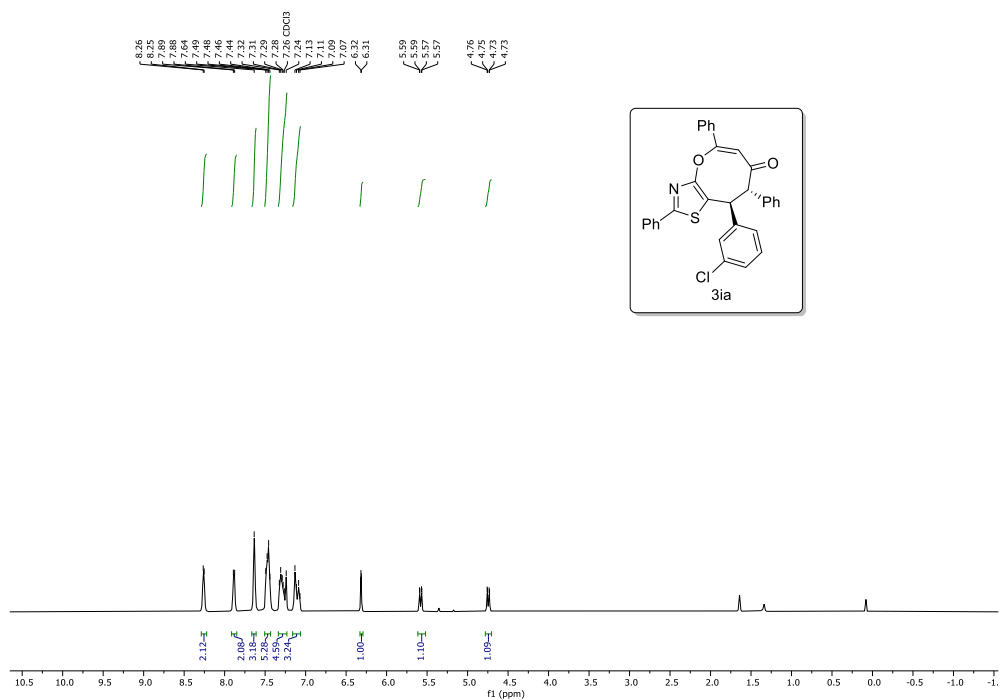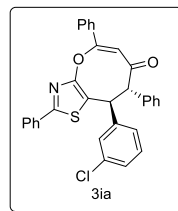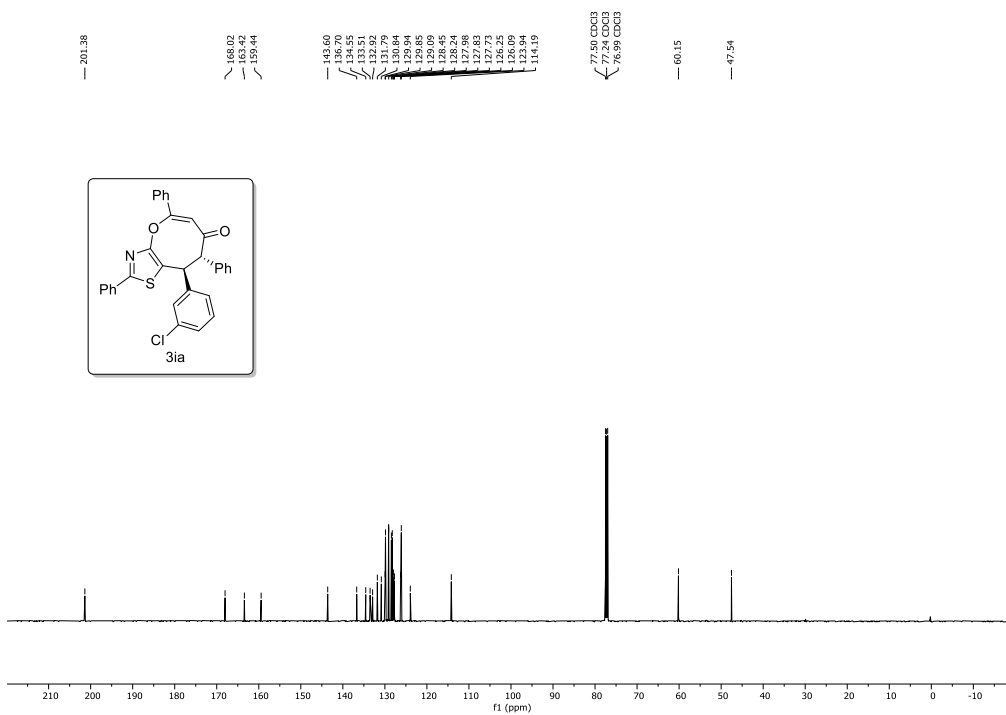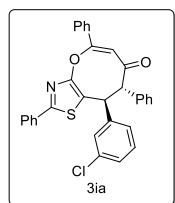

**(8*S*,9*S*,*Z*)-9-(3-bromophenyl)-2,5,8-triphenyl-8,9-dihydro-7*H*-oxocino[2,3-*d*]thiazol-7-one (3ja)**

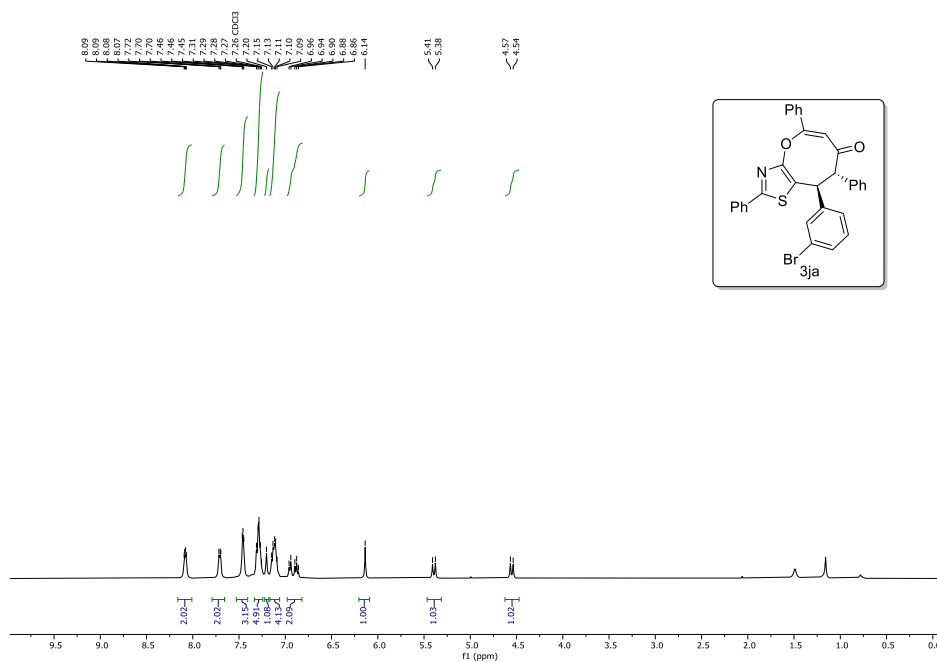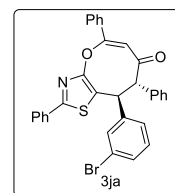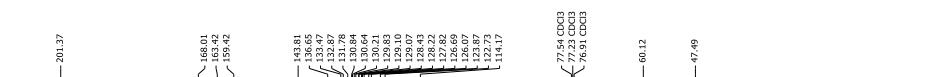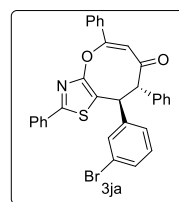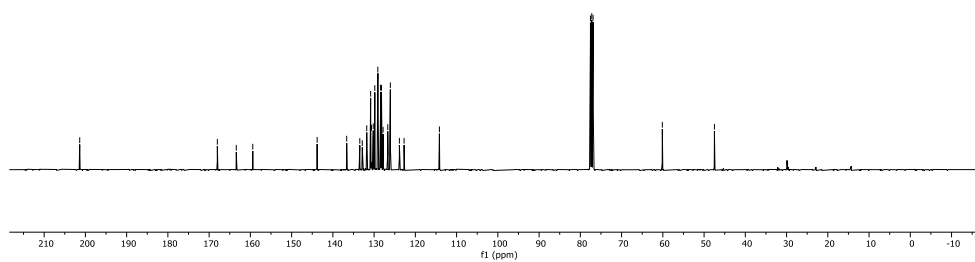

**(8*S*,9*S*,*Z*)-2,5,8-triphenyl-9-(3-(trifluoromethyl)phenyl)-8,9-dihydro-7*H*-oxocino[2,3-*d*]thiazol-7-one (3ka)**

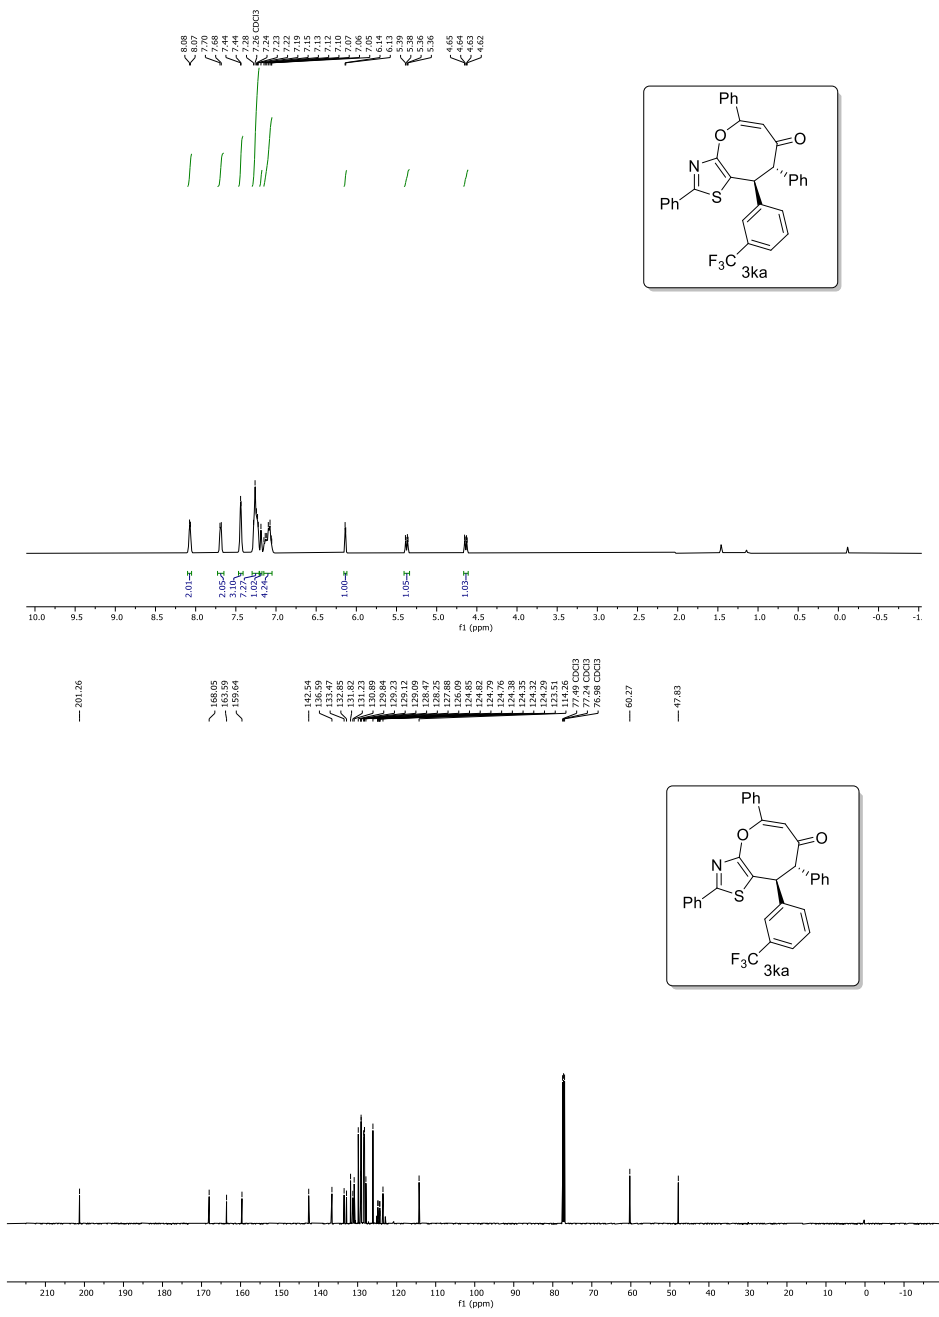

(8S,9S,Z)-2,5,8-triphenyl-9-(o-tolyl)-8,9-dihydro-7H-oxocino[2,3-d]thiazol-7-one (3la)

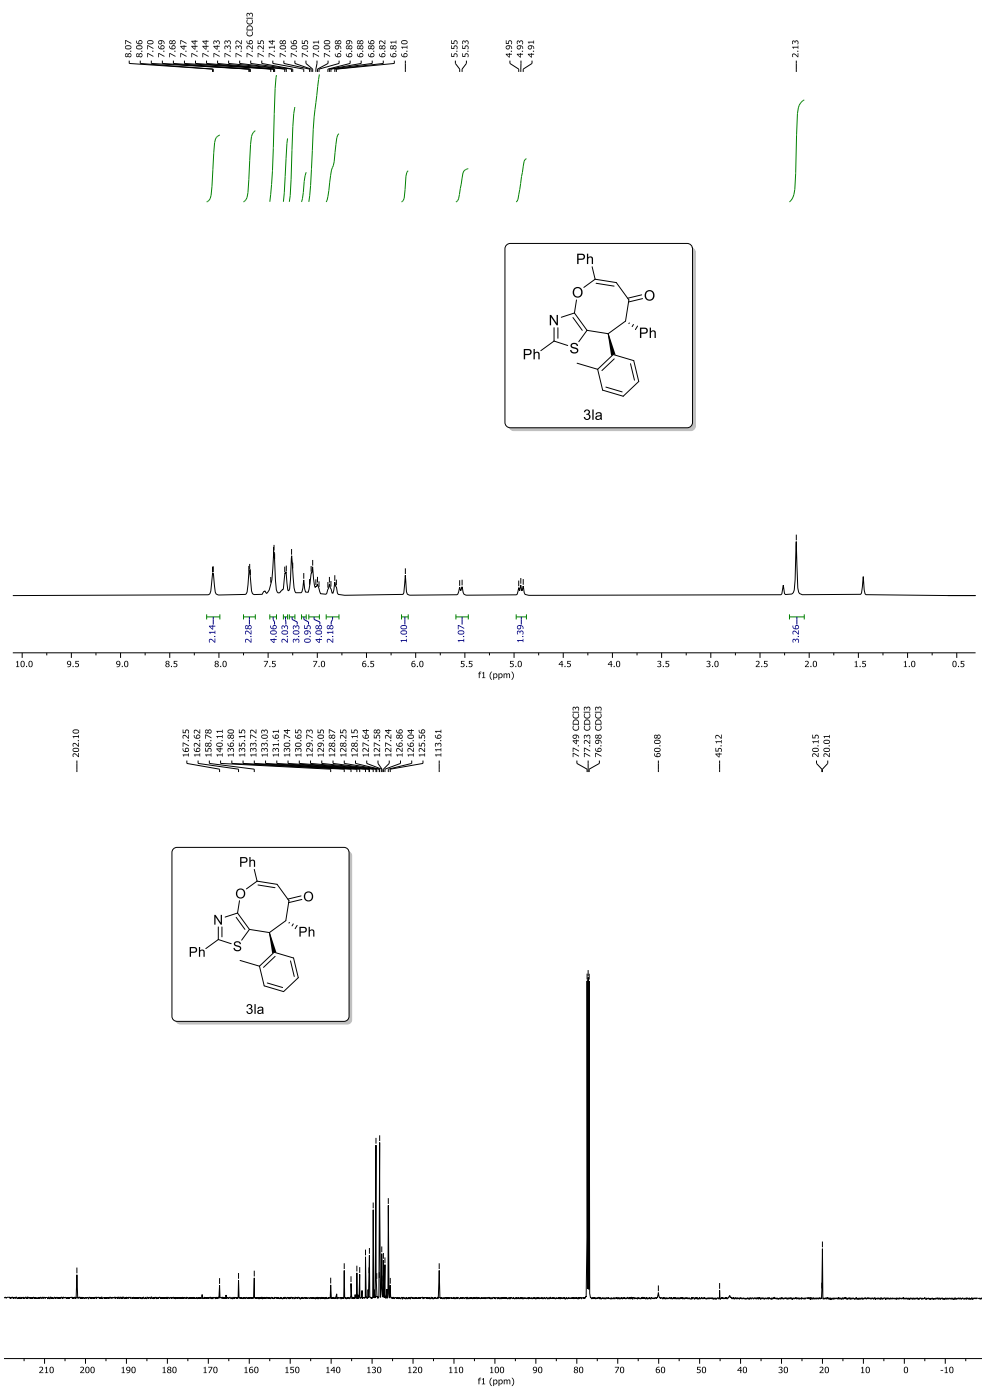

**(Z)-9-(2-methoxyphenyl)-2,5,8-triphenyl-8,9-dihydro-7H-oxocino[2,3-d]thiazol-7-one (3ma)**

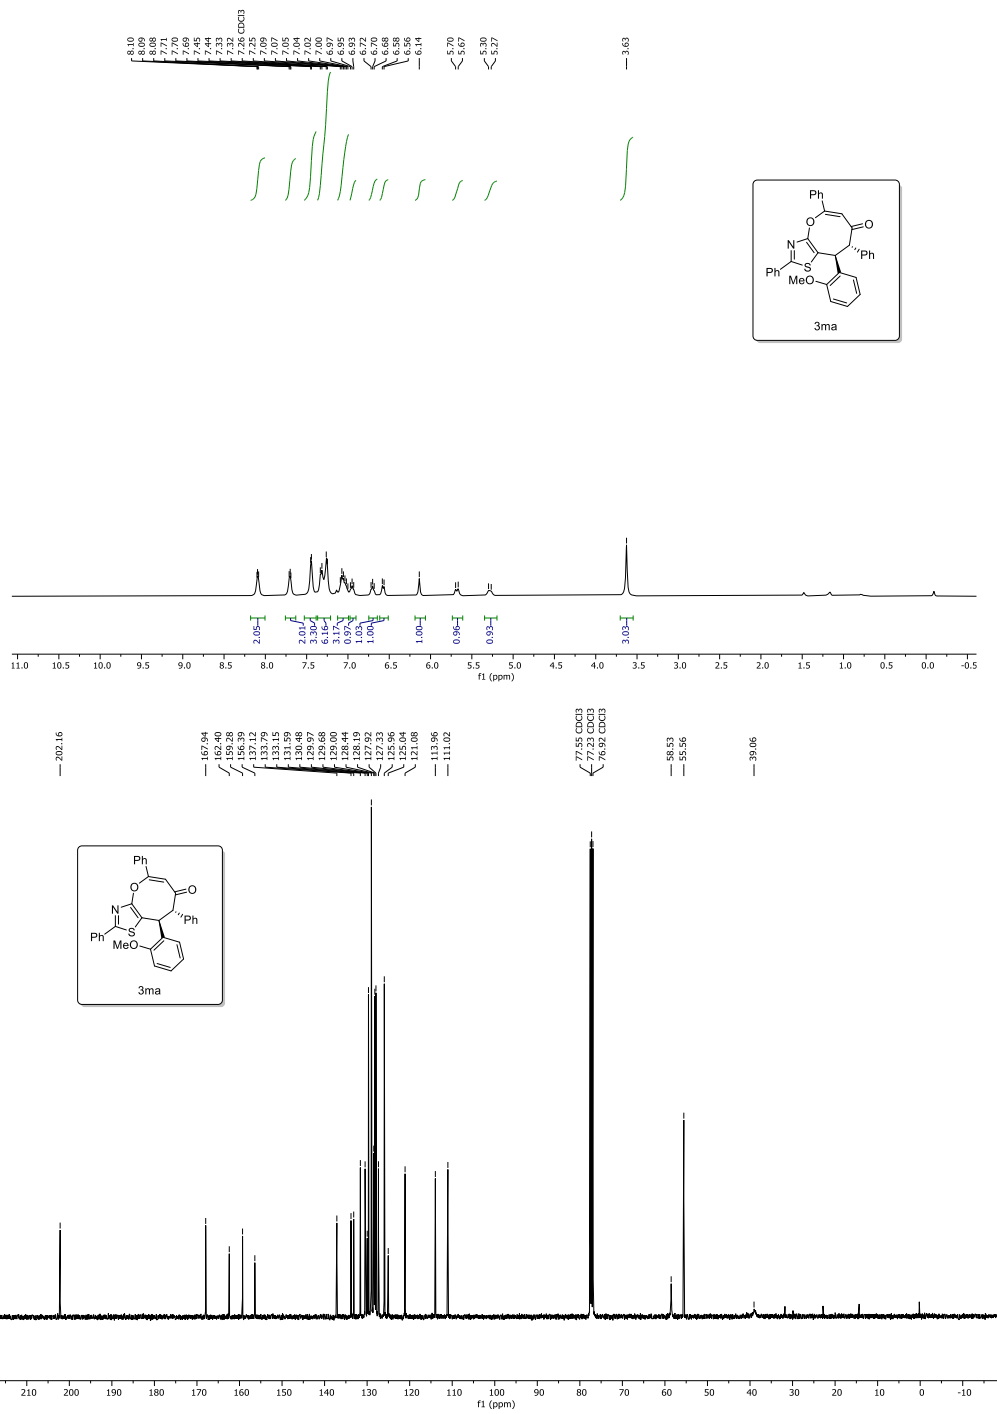

**(8*S*,9*S*,*Z*)-9-(2-fluorophenyl)-2,5,8-triphenyl-8,9-dihydro-7*H*-oxocino[2,3-*d*]thiazol-7-one (3na)**

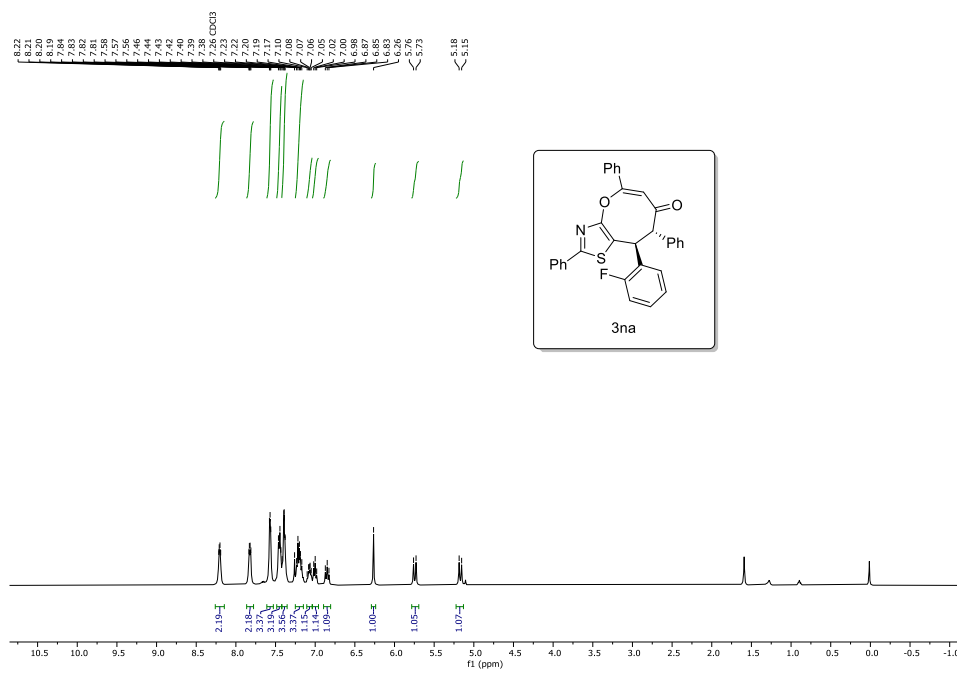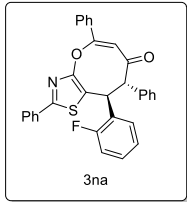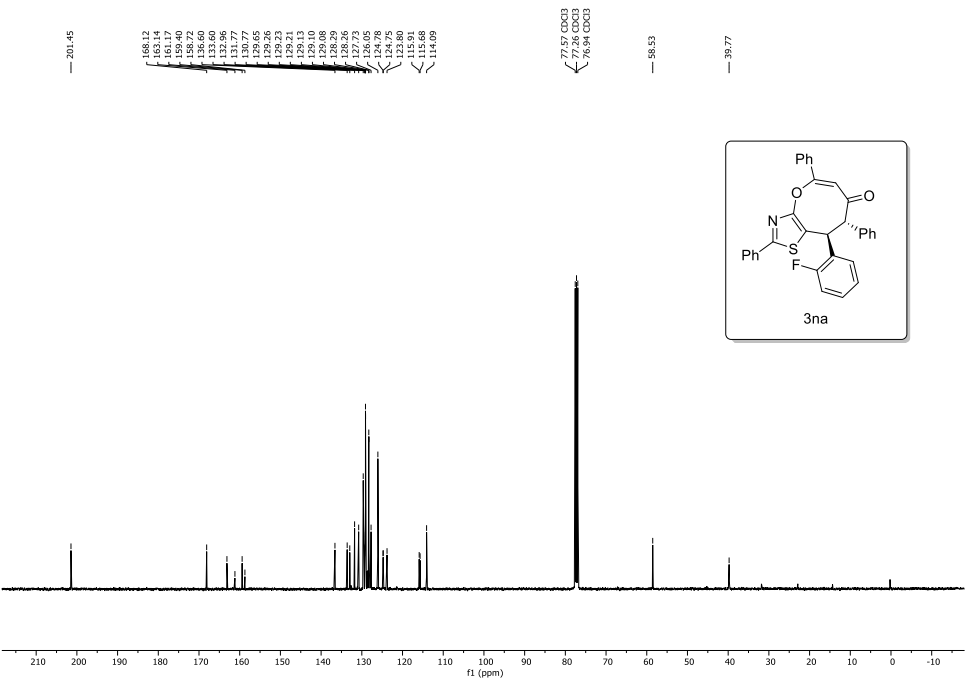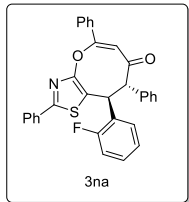

(8*S*,9*S*,*Z*)-9-(2-chlorophenyl)-2,5,8-triphenyl-8,9-dihydro-7*H*-oxocino[2,3-*d*]thiazol-7-one (3*oa*)

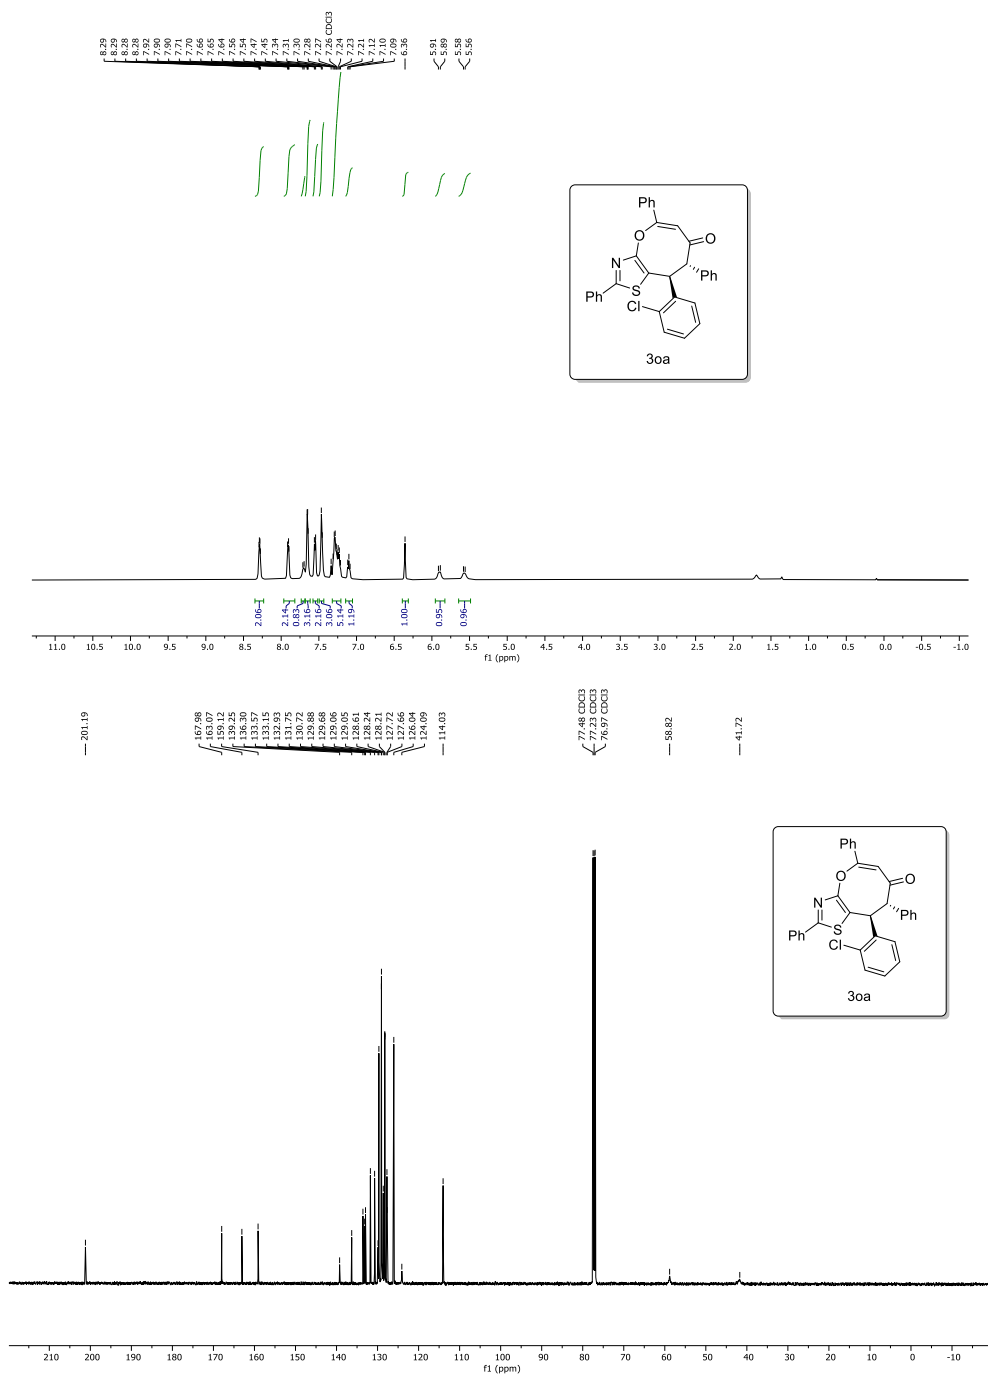

(8*S*,9*S*,*Z*)-9-(2-bromophenyl)-2,5,8-triphenyl-8,9-dihydro-7*H*-oxocino[2,3-*d*]thiazol-7-one (3pa)

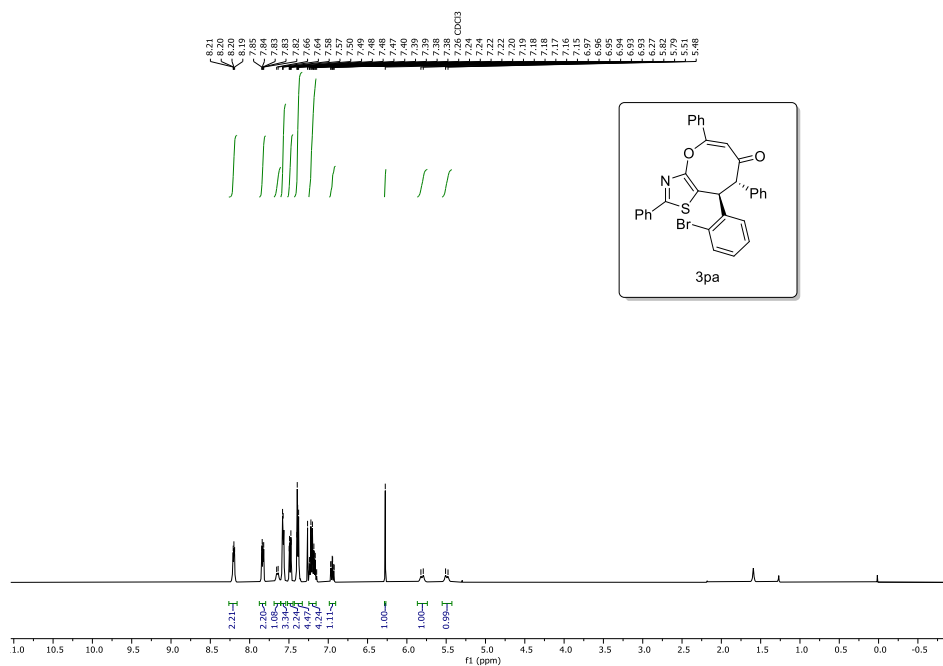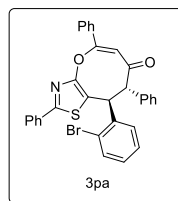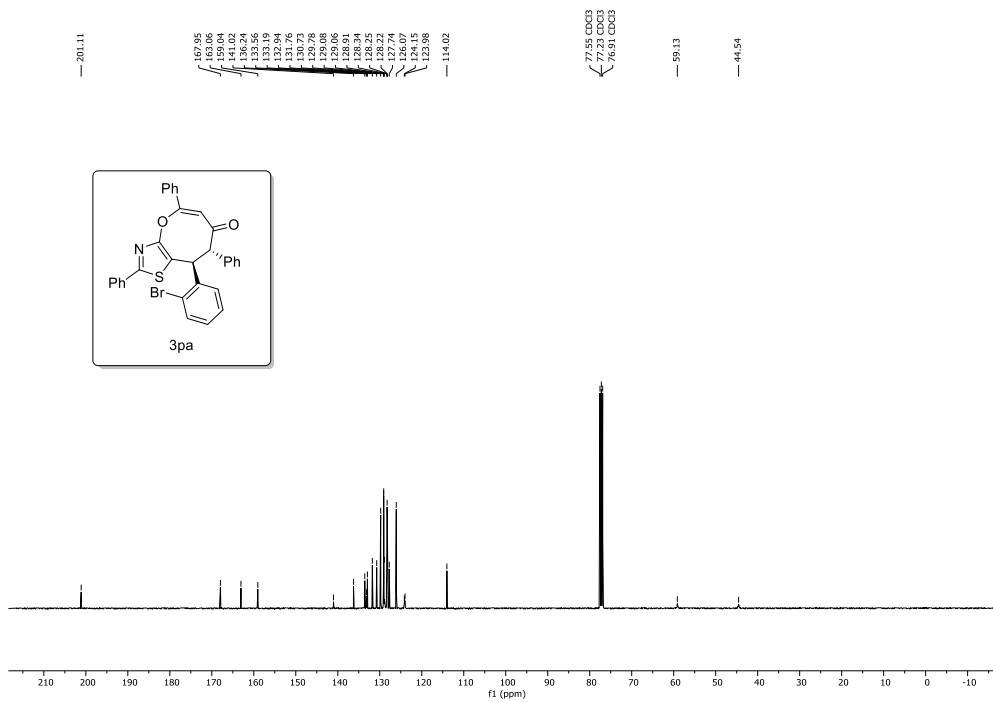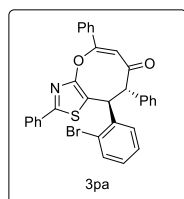

**(8*S*,9*S*,*Z*)-9-(2,4-dimethylphenyl)-2,5,8-triphenyl-8,9-dihydro-7*H*-oxocino[2,3-*d*]thiazol-7-one (3qa)**

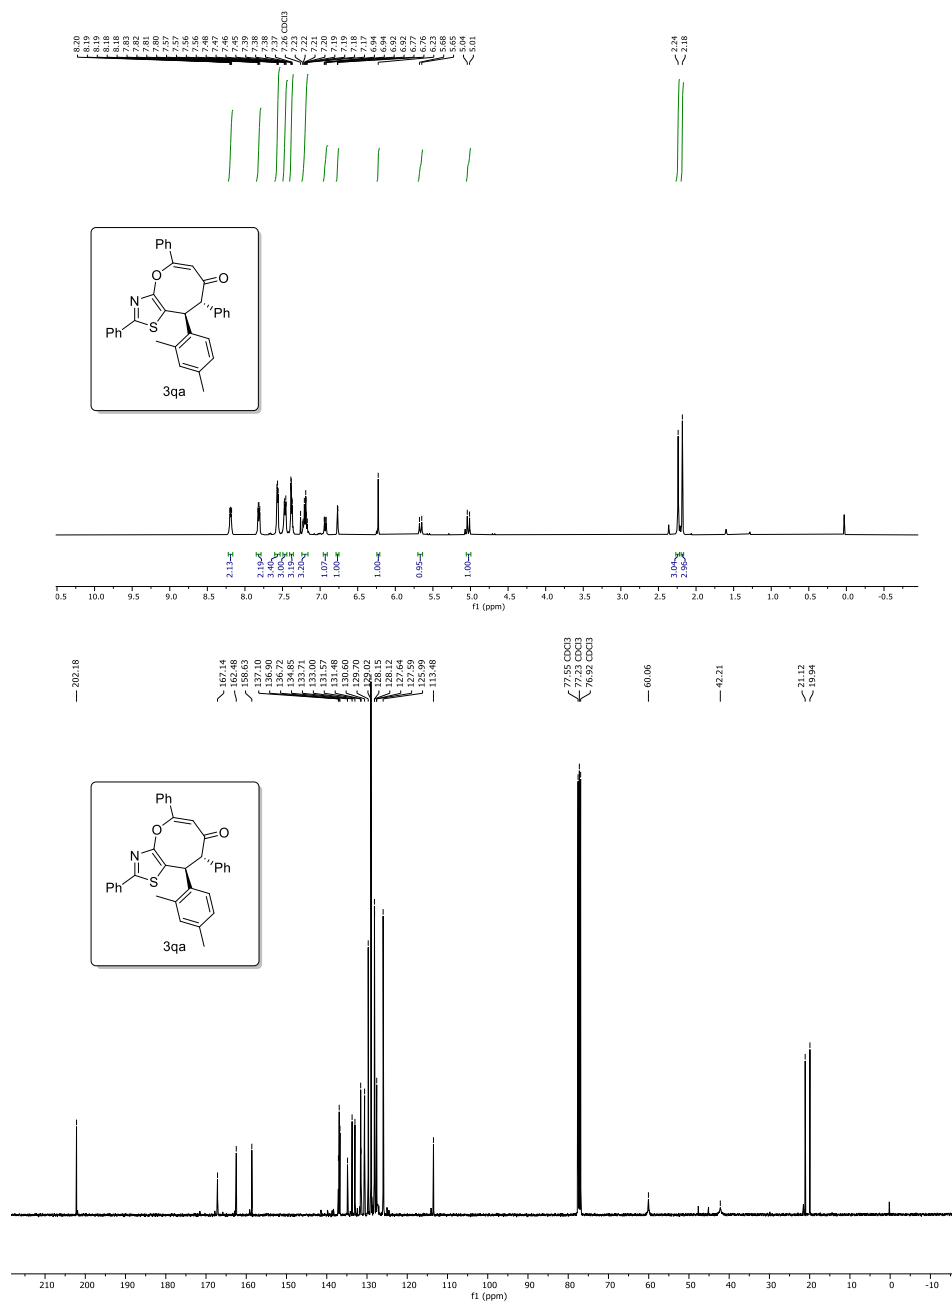



(8*S*,9*S*, *Z*)-9-(2,4-difluorophenyl)-2,5,8-triphenyl-8,9-dihydro-7*H*-oxocino[2,3-*d*]thiazol-7-one (3*sa*)

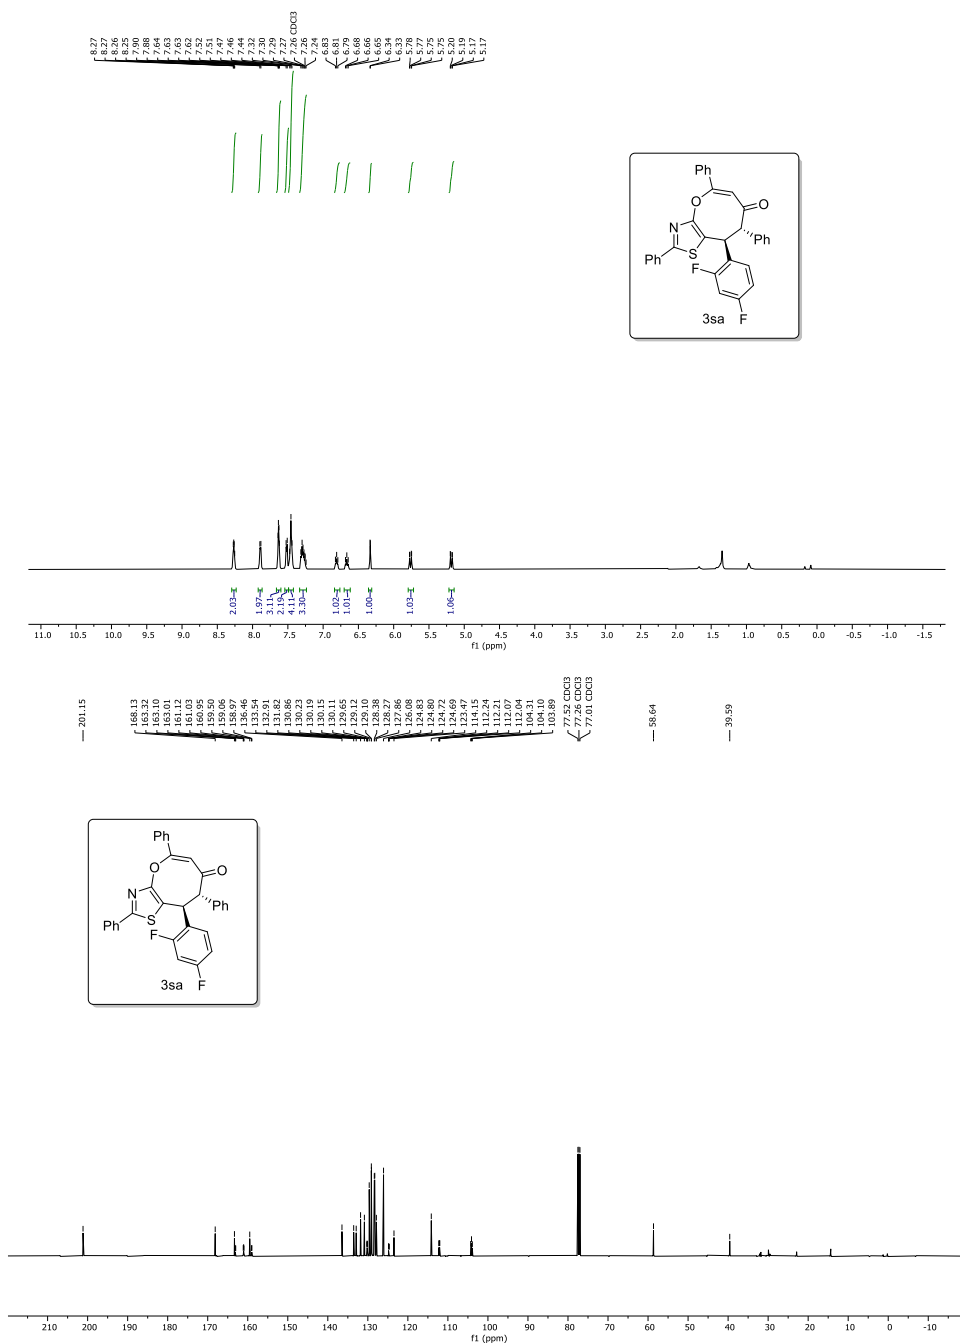





**(8S,9S, Z)-2,8,9-triphenyl-5-(p-tolyl)-8,9-dihydro-7H-oxocino[2,3-d]thiazol-7-one (3ab)**

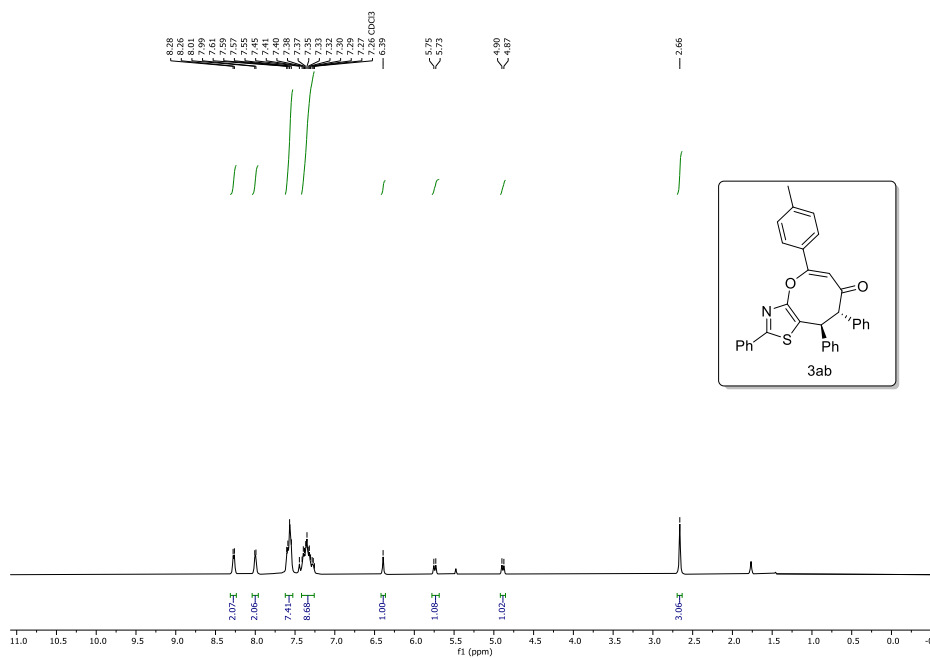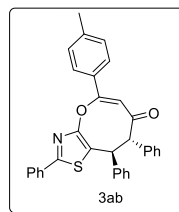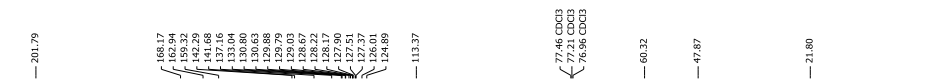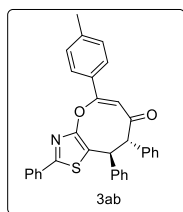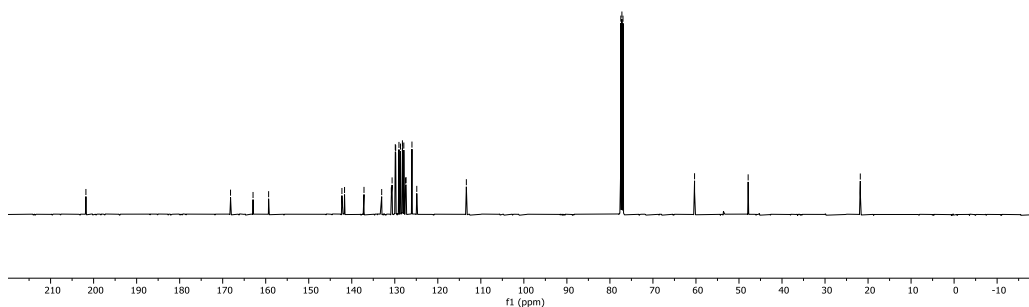

**(8*S*,9*S*, *Z*)-5-(4-(*tert*-butyl)phenyl)-2,8,9-triphenyl-8,9-dihydro-7*H*-oxocino[2,3-*d*]thiazol-7-one (3ac)**

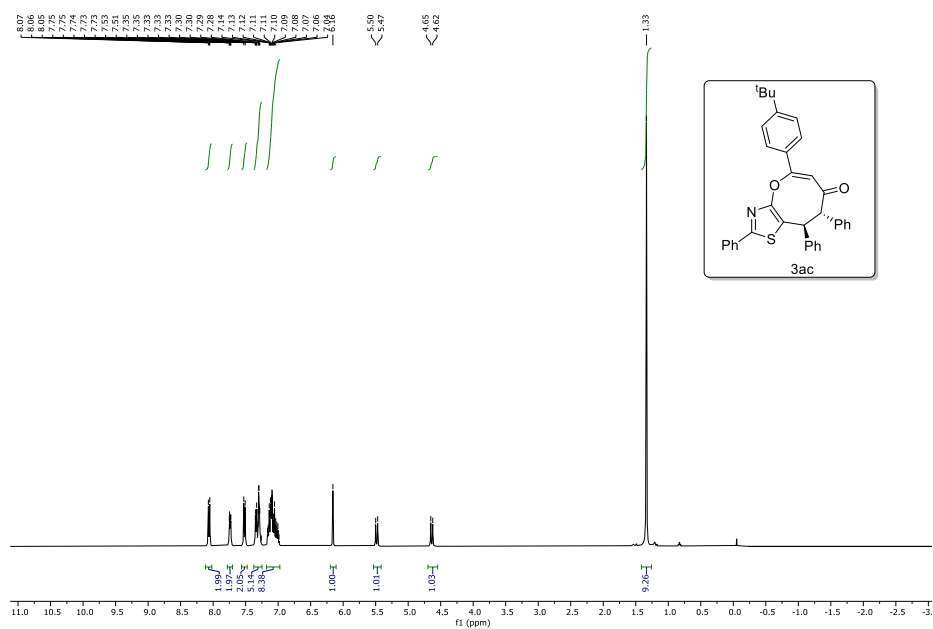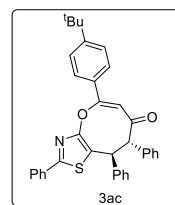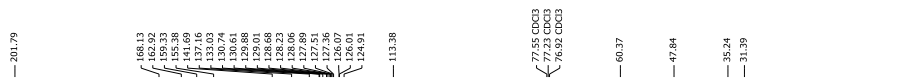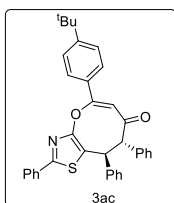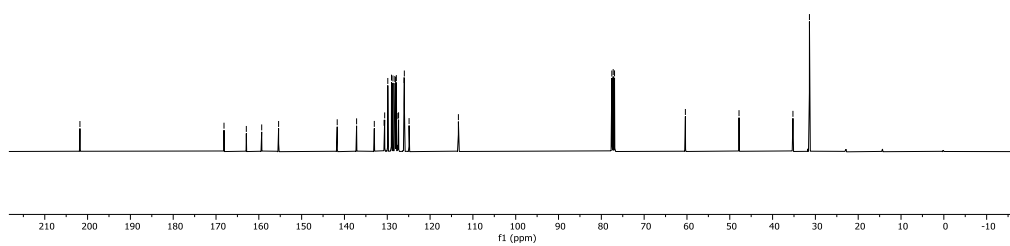



**(8S,9S, Z)-5-(4-chlorophenyl)-2,8,9-triphenyl-8,9-dihydro-7H-oxocino[2,3-d]thiazol-7-one (3ae)**

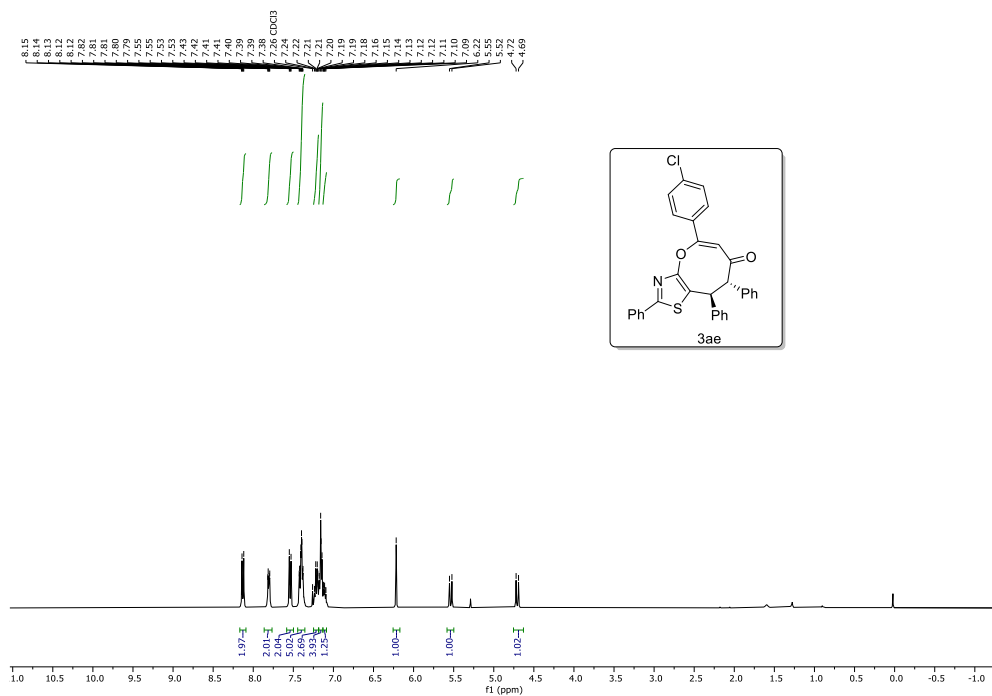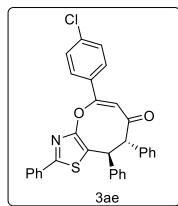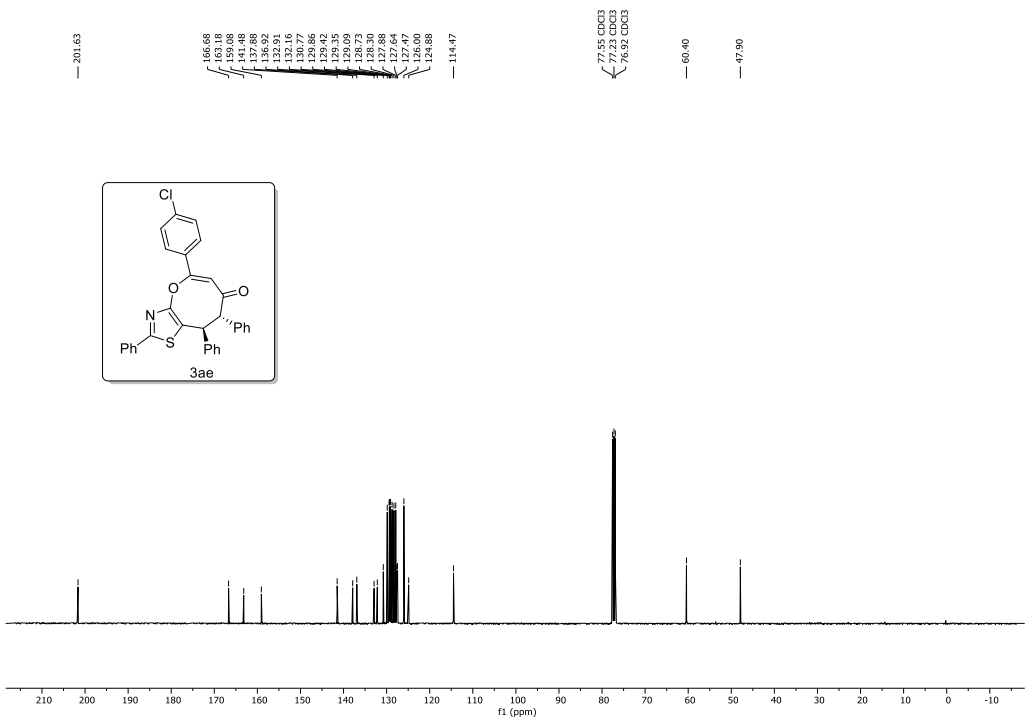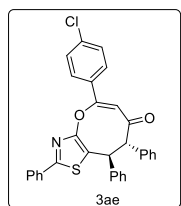

**(8*S*,9*S*,*Z*)-5-(4-bromophenyl)-2,8,9-triphenyl-8,9-dihydro-7*H*-oxocino[2,3-*d*]thiazol-7-one (3af)**

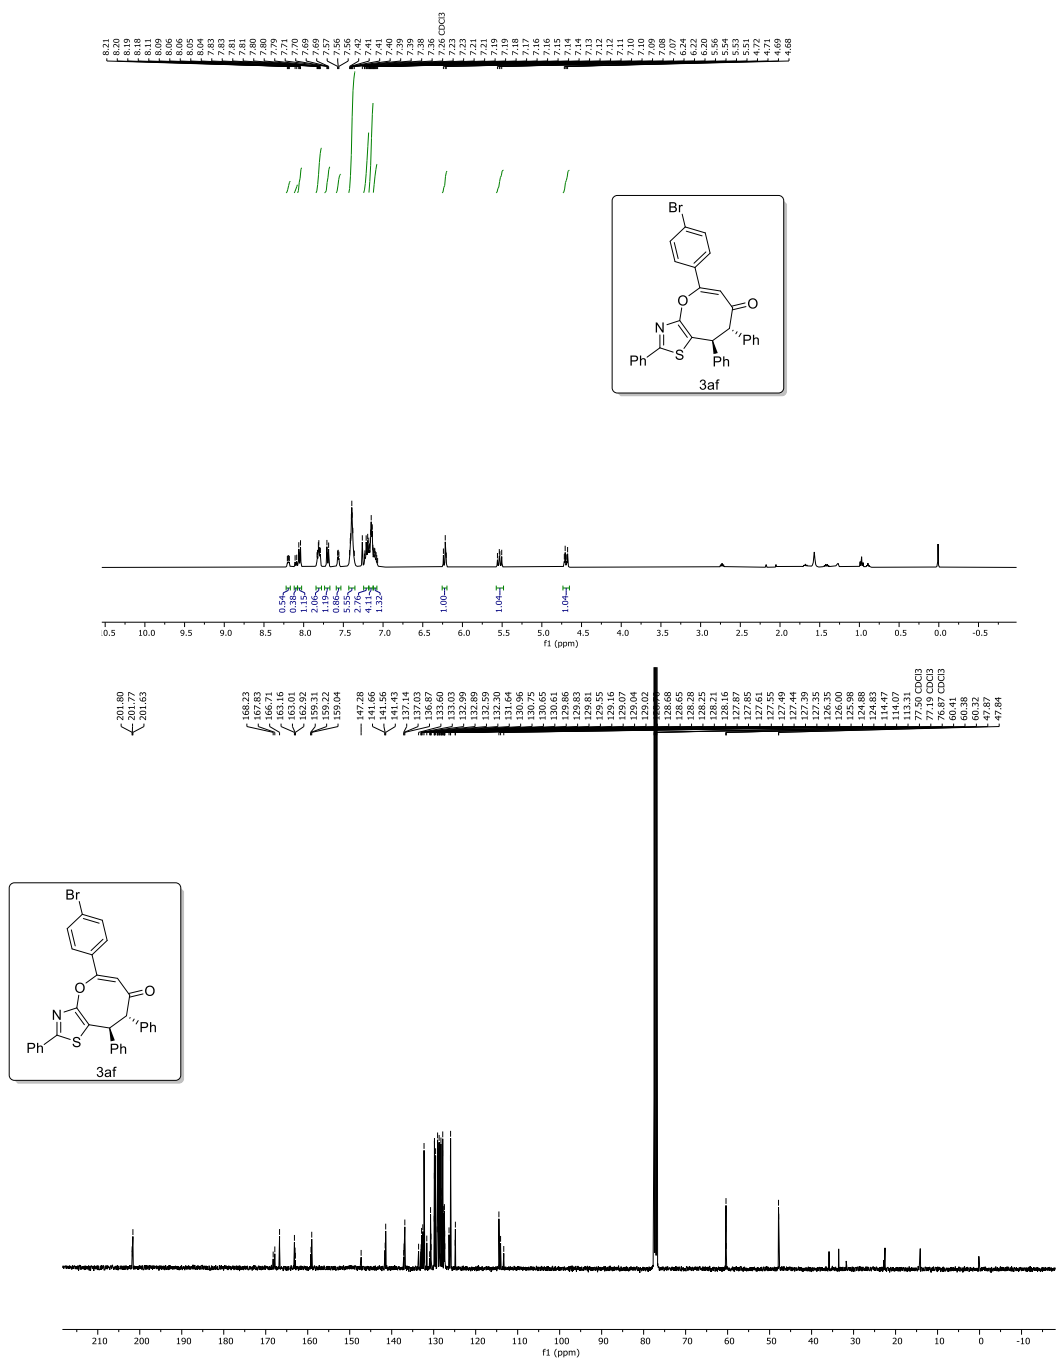

**(8*S*,9*S*,*Z*)-2,8,9-triphenyl-5-(*m*-tolyl)-8,9-dihydro-7*H*-oxocino[2,3-*d*]thiazol-7-one (3ag)**

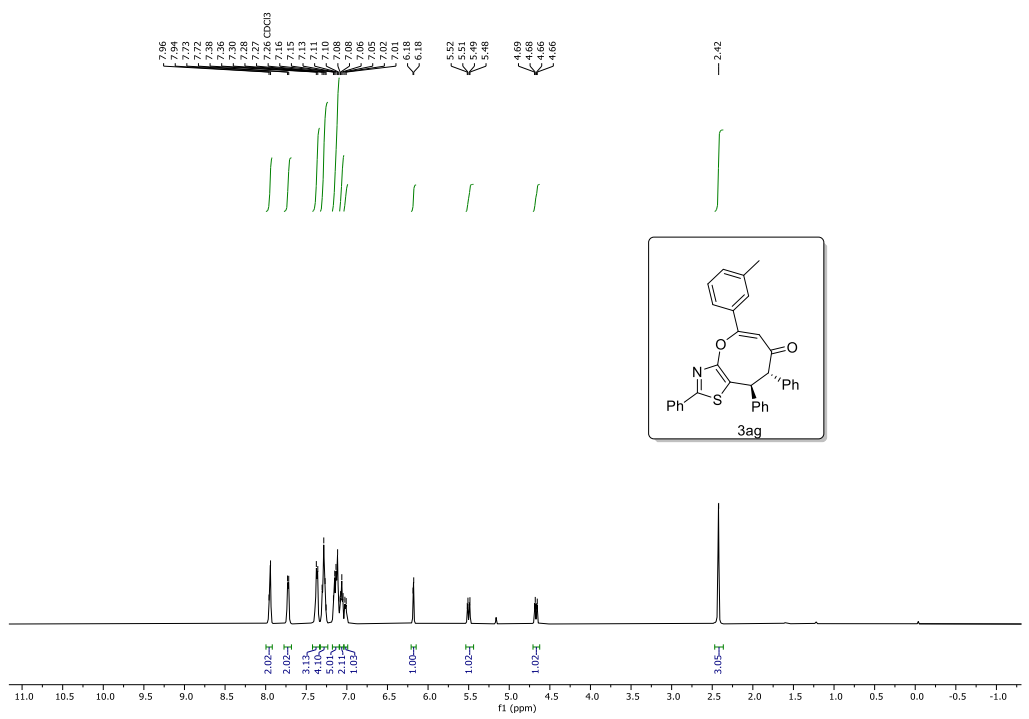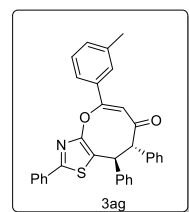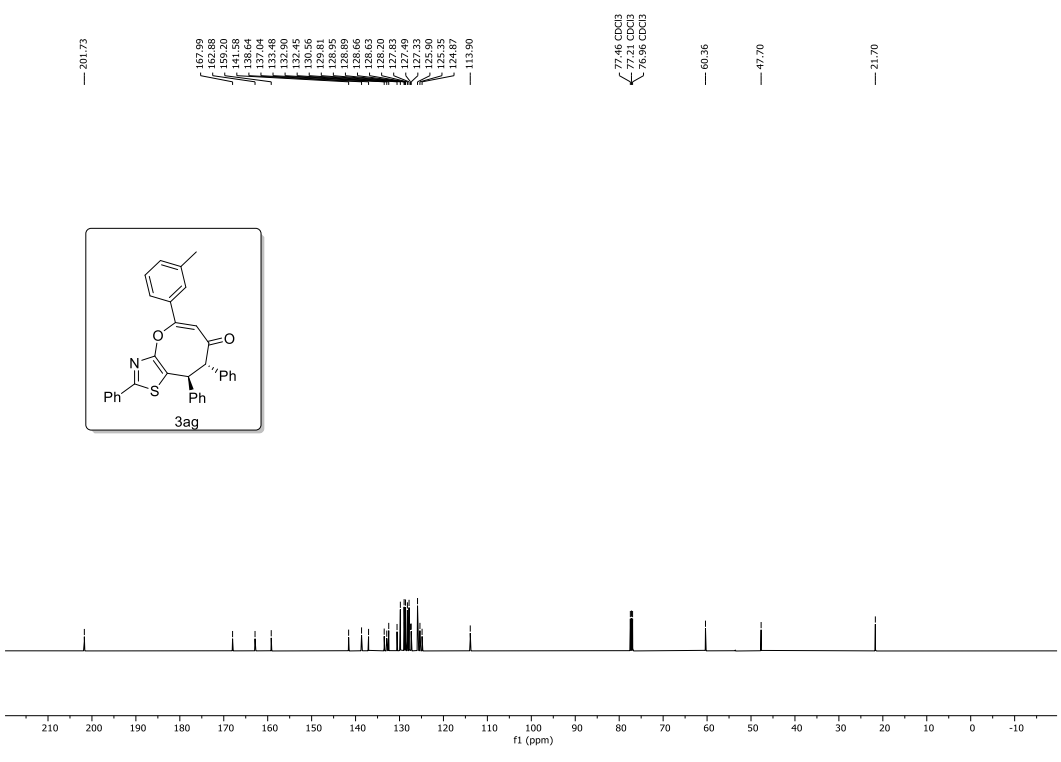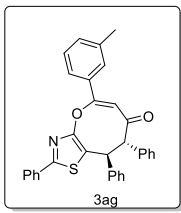

**(8*S*,9*S*,*Z*)-5-(3-methoxyphenyl)-2,8,9-triphenyl-8,9-dihydro-7*H*-oxocino[2,3-*d*]thiazol-7-one (3ah)**

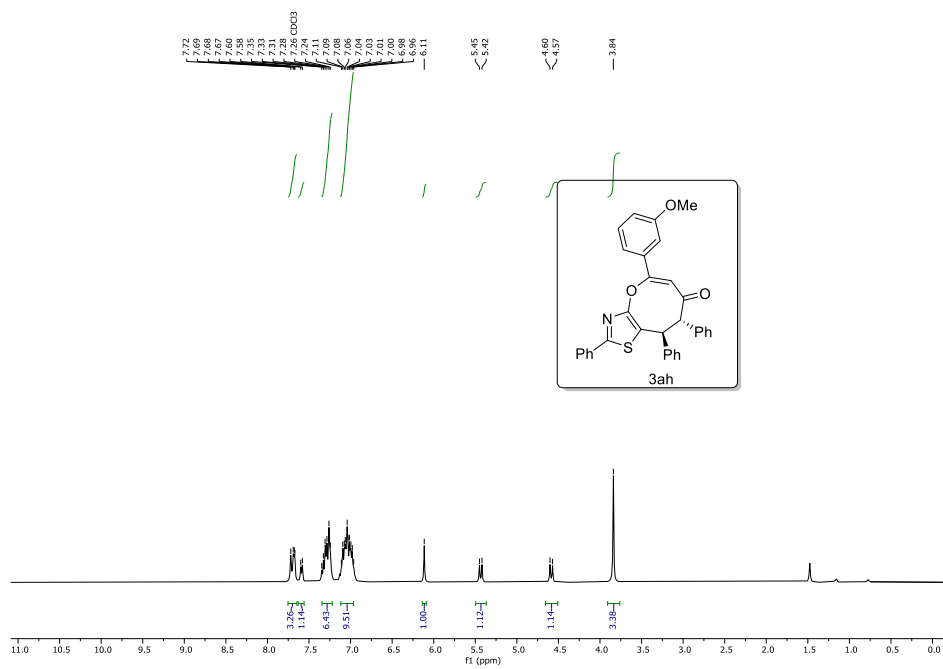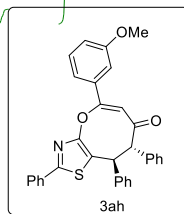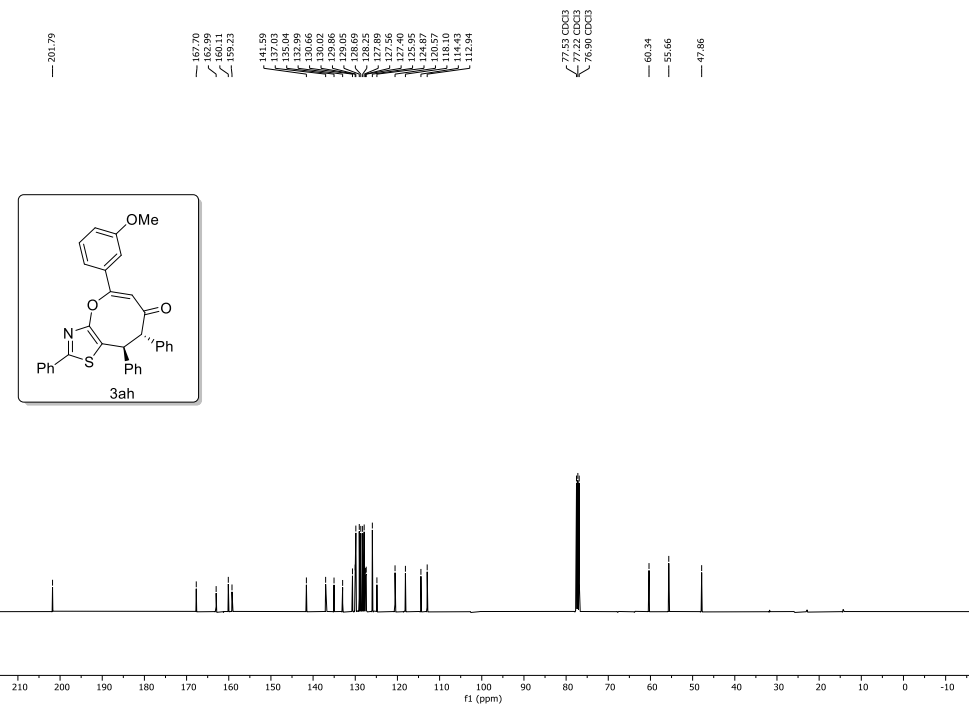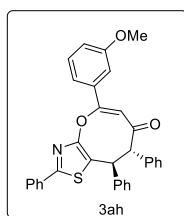

**(8S,9S,Z)-2,8,9-triphenyl-5-(o-tolyl)-8,9-dihydro-7H-oxocino[2,3-d]thiazol-7-one (3ai)**

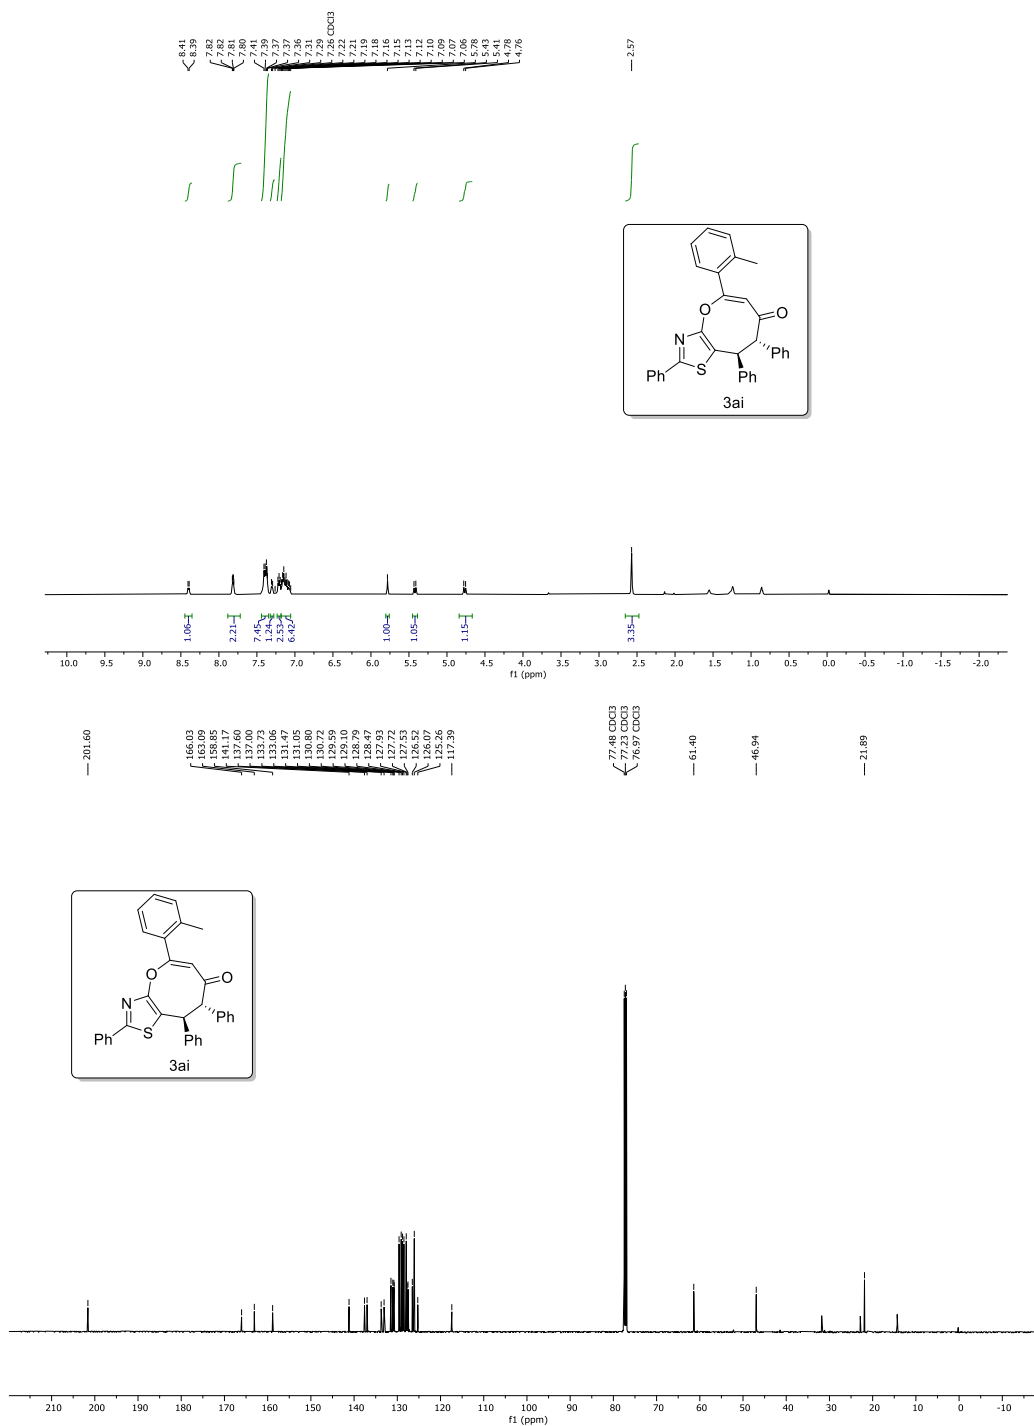



**(8R,9S,Z)-2,5,9-triphenyl-8-(thiophen-2-yl)-8,9-dihydro-7H-oxocino[2,3-d]thiazol-7-one (3ak)**

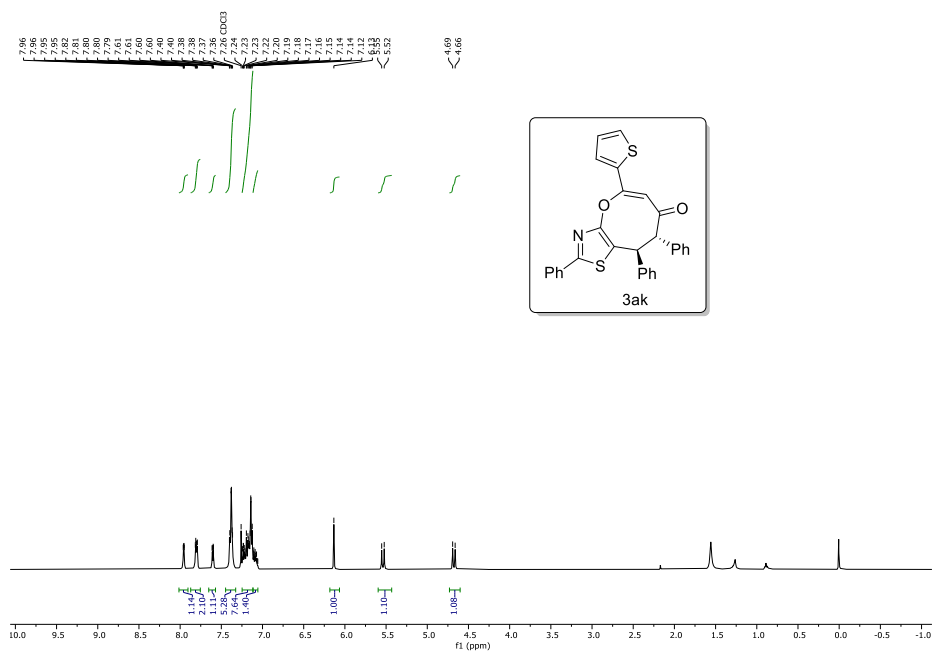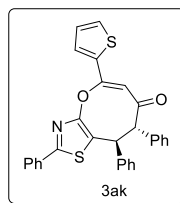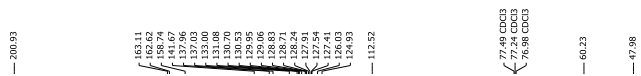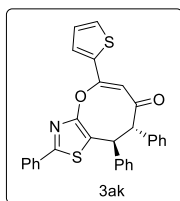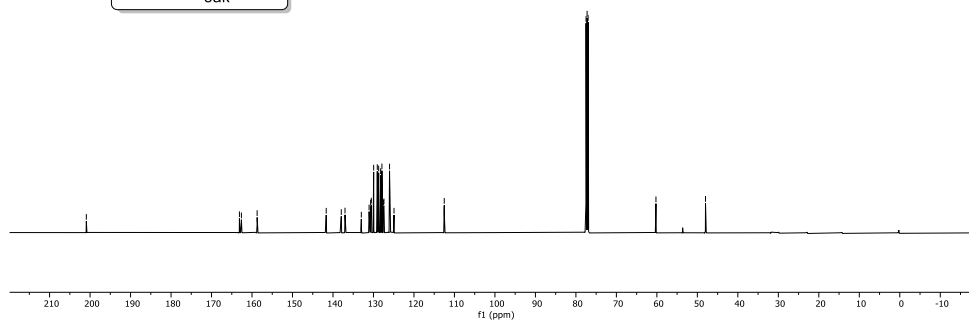

(8*S*,9*S*,*Z*)-2,5,9-triphenyl-8-(*p*-tolyl)-8,9-dihydro-7*H*-oxocino[2,3-*d*]thiazol-7-one (3al)

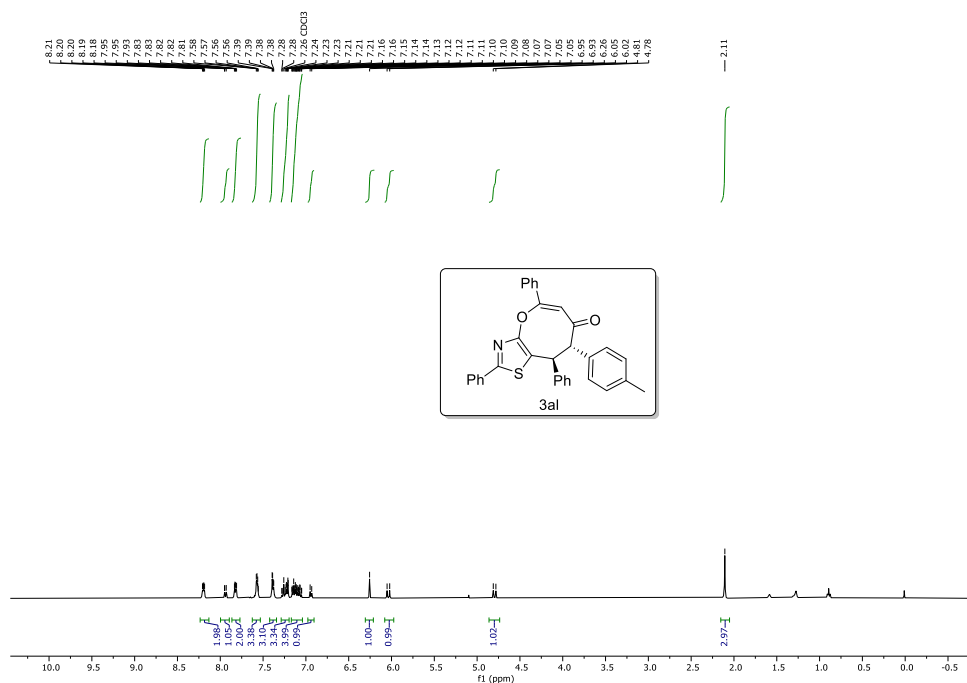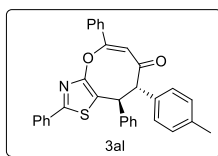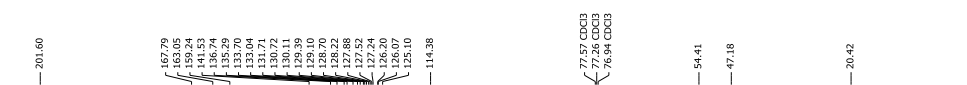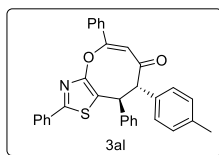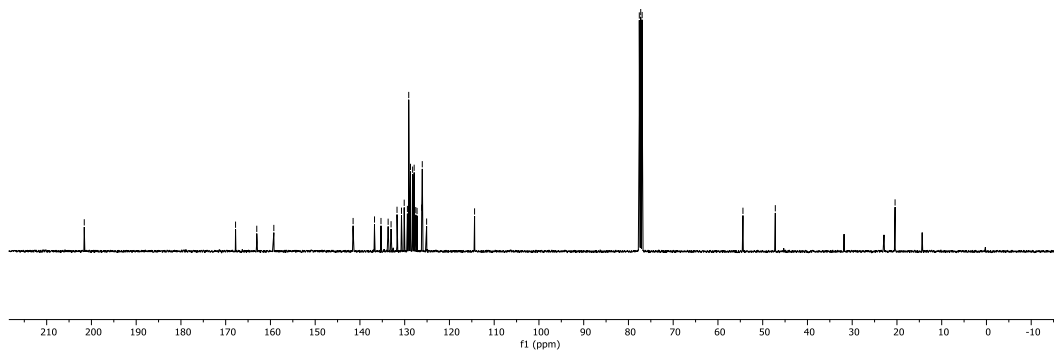

**(8*S*,9*S*,*Z*)-8-(4-methoxyphenyl)-2,5,9-triphenyl-8,9-dihydro-7*H*-oxocino[2,3-*d*]thiazol-7-one (3am)**

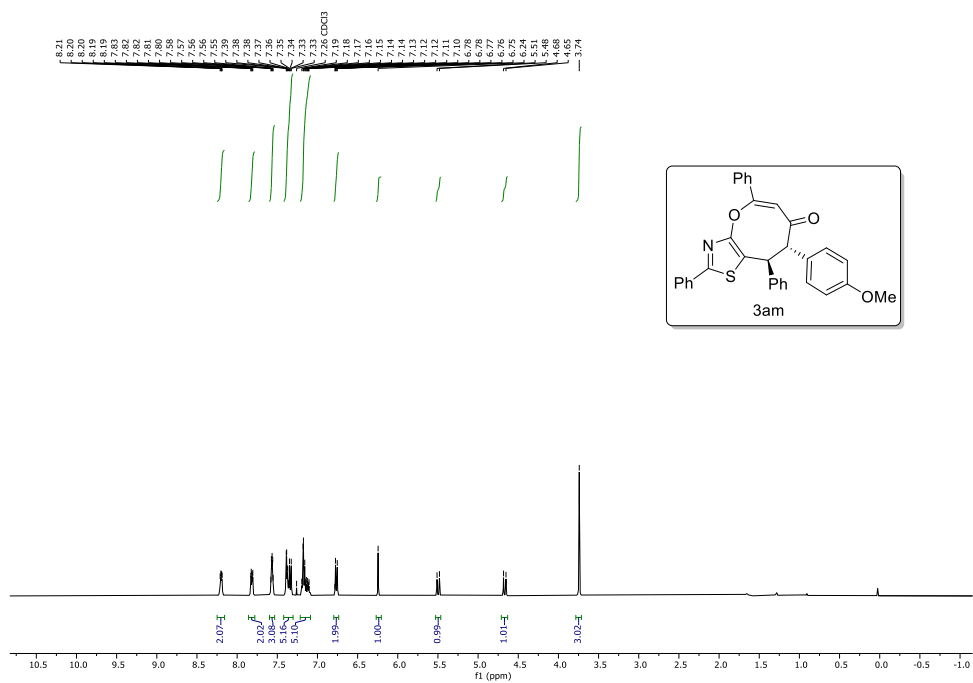



**(8S,9S,Z)-2,5,9-triphenyl-8-(m-tolyl)-8,9-dihydro-7H-oxocino[2,3-d]thiazol-7-one (3ao)**

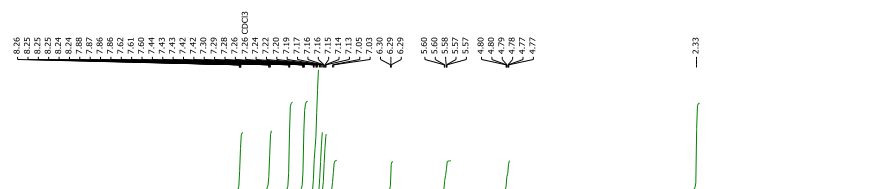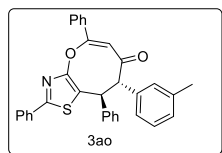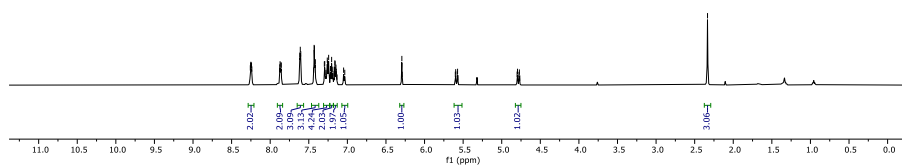

201.95

167.67  
163.00  
159.17  
158.66  
137.77  
136.88  
136.86  
133.02  
131.63  
130.86  
128.04  
128.03  
128.02  
128.34  
128.16  
127.92  
127.39  
126.67  
126.02  
125.07  
114.04

77.24 CDCl<sub>3</sub>  
76.99 CDCl<sub>3</sub>

60.38

47.55

21.60

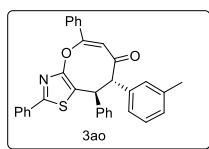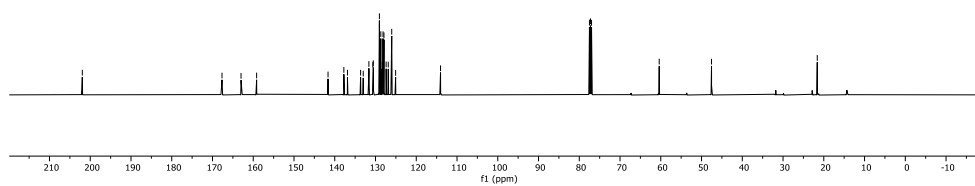

**(8*S*,9*S*,*Z*)-2,5,9-triphenyl-8-(*o*-tolyl)-8,9-dihydro-7*H*-oxocino[2,3-*d*]thiazol-7-one (3ap)**

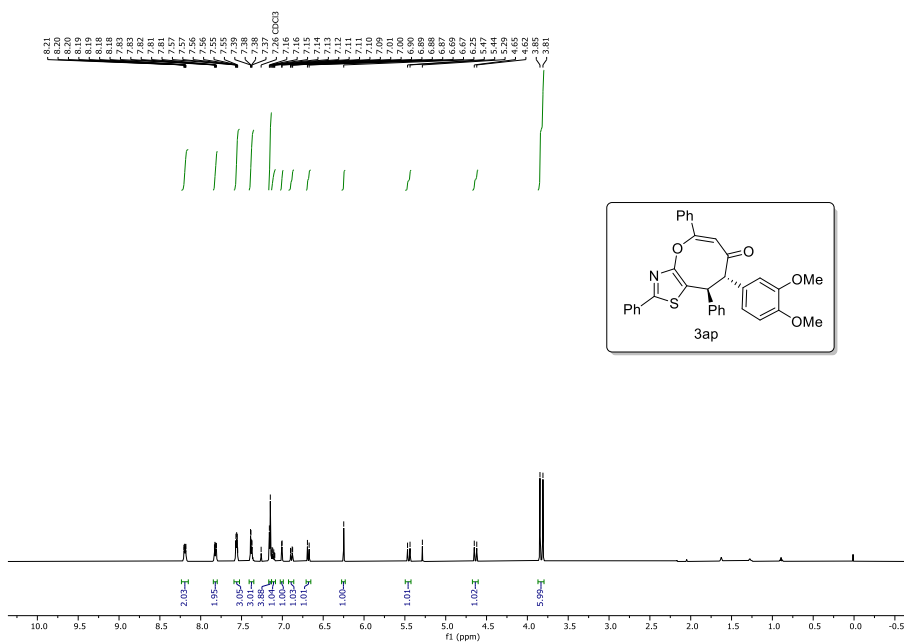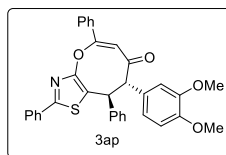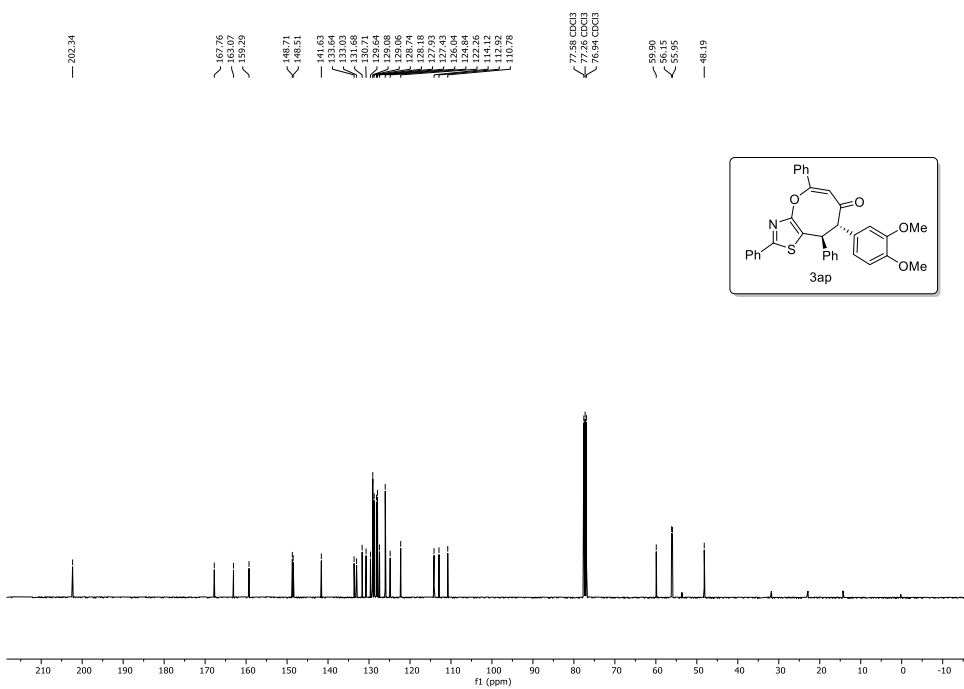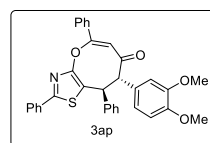

**(8S,9S,Z)-8-(naphthalen-1-yl)-2,5,9-triphenyl-8,9-dihydro-7H-oxocino[2,3-d]thiazol-7-one (3aq)**

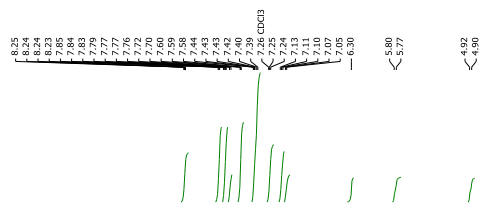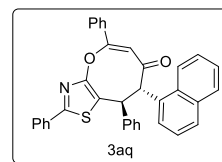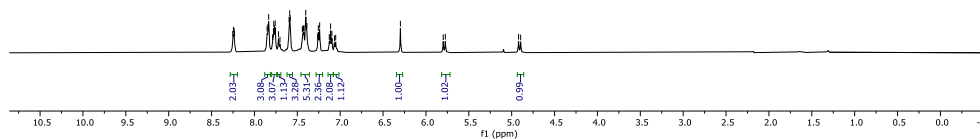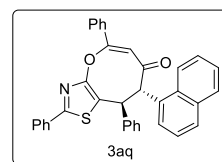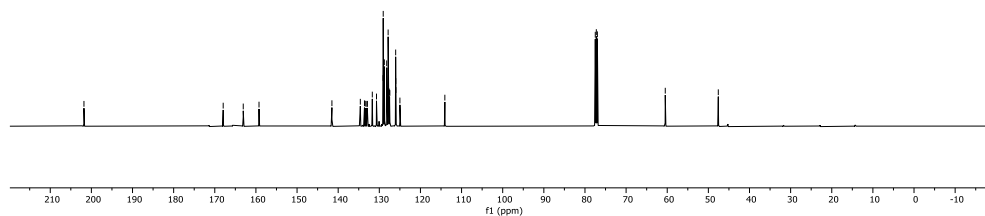

(8R,9S,Z)-8-methyl-2,5,9-triphenyl-8,9-dihydro-7H-oxocino[2,3-d]thiazol-7-one (3ar)

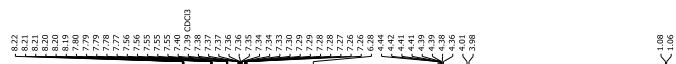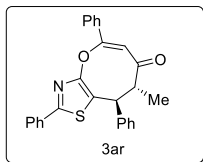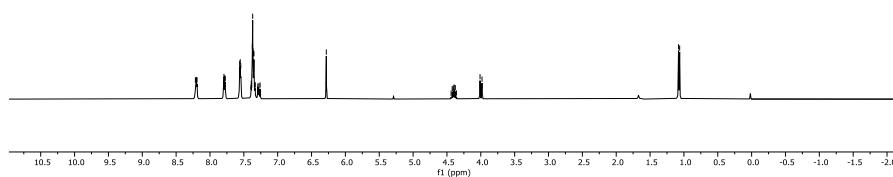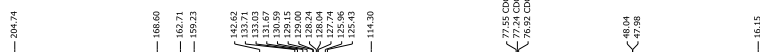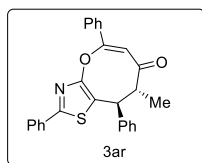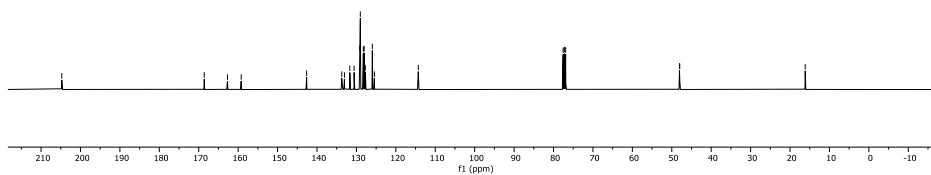

**(S,Z)-2,5,9-triphenyl-8,9-dihydro-7H-oxocino[2,3-d]thiazol-7-one (3as)**

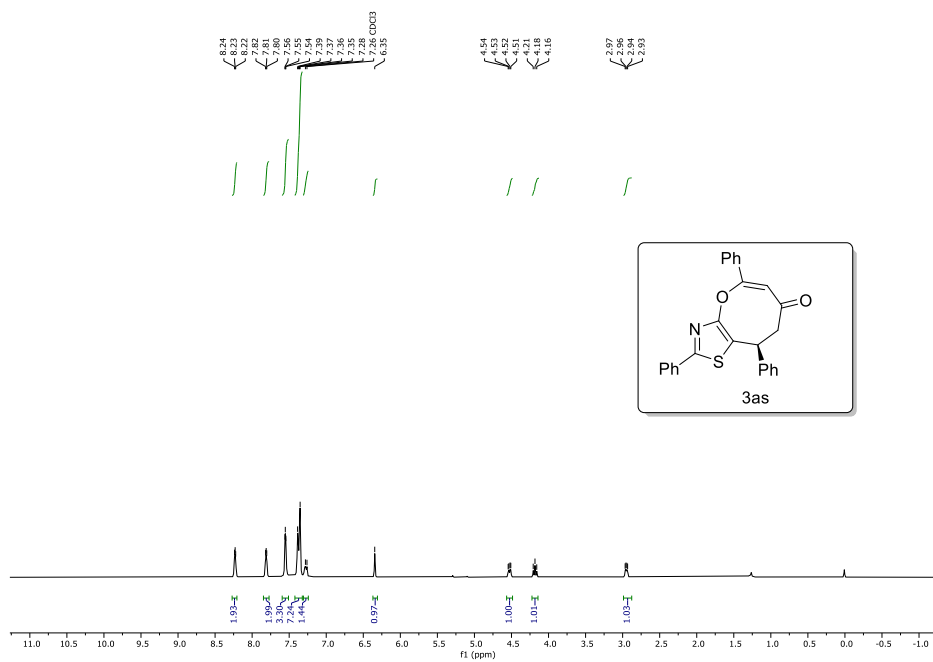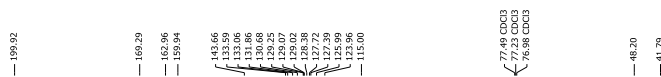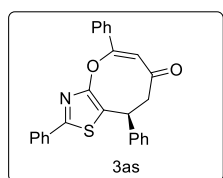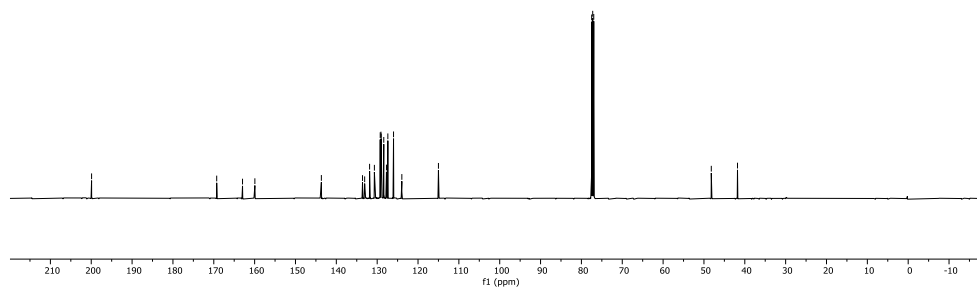

**(8S,9S,E)-6-chloro-2,5,8,9-tetraphenyl-8,9-dihydro-7H-oxocino[2,3-d]thiazol-7-one (4)**

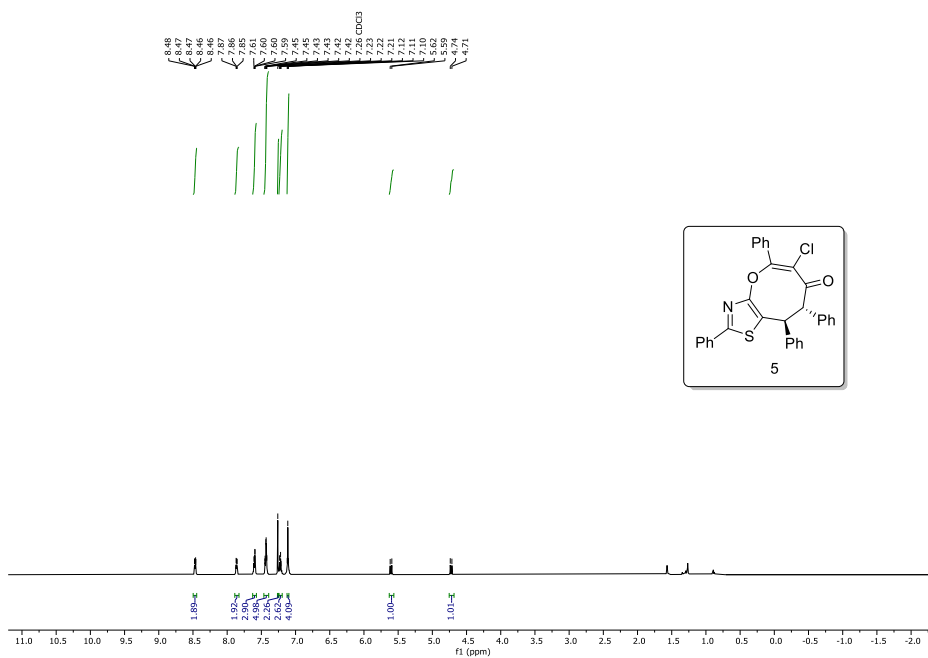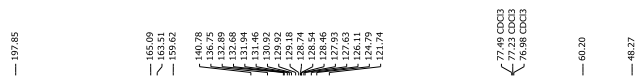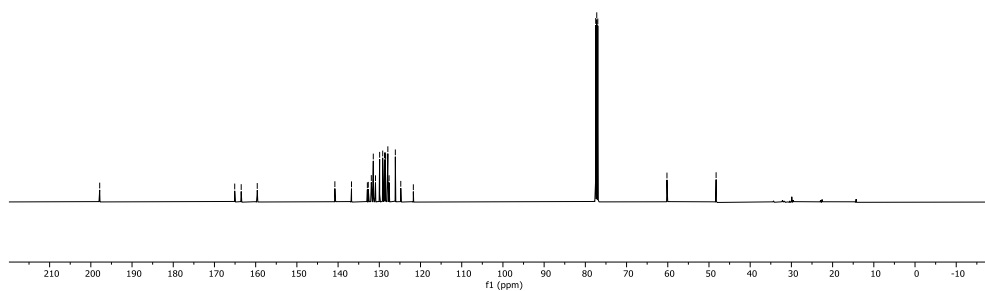

(7S,8S,9S,Z)-2,5,8,9-tetraphenyl-8,9-dihydro-7H-oxocino[2,3-d]thiazol-7-ol (5)

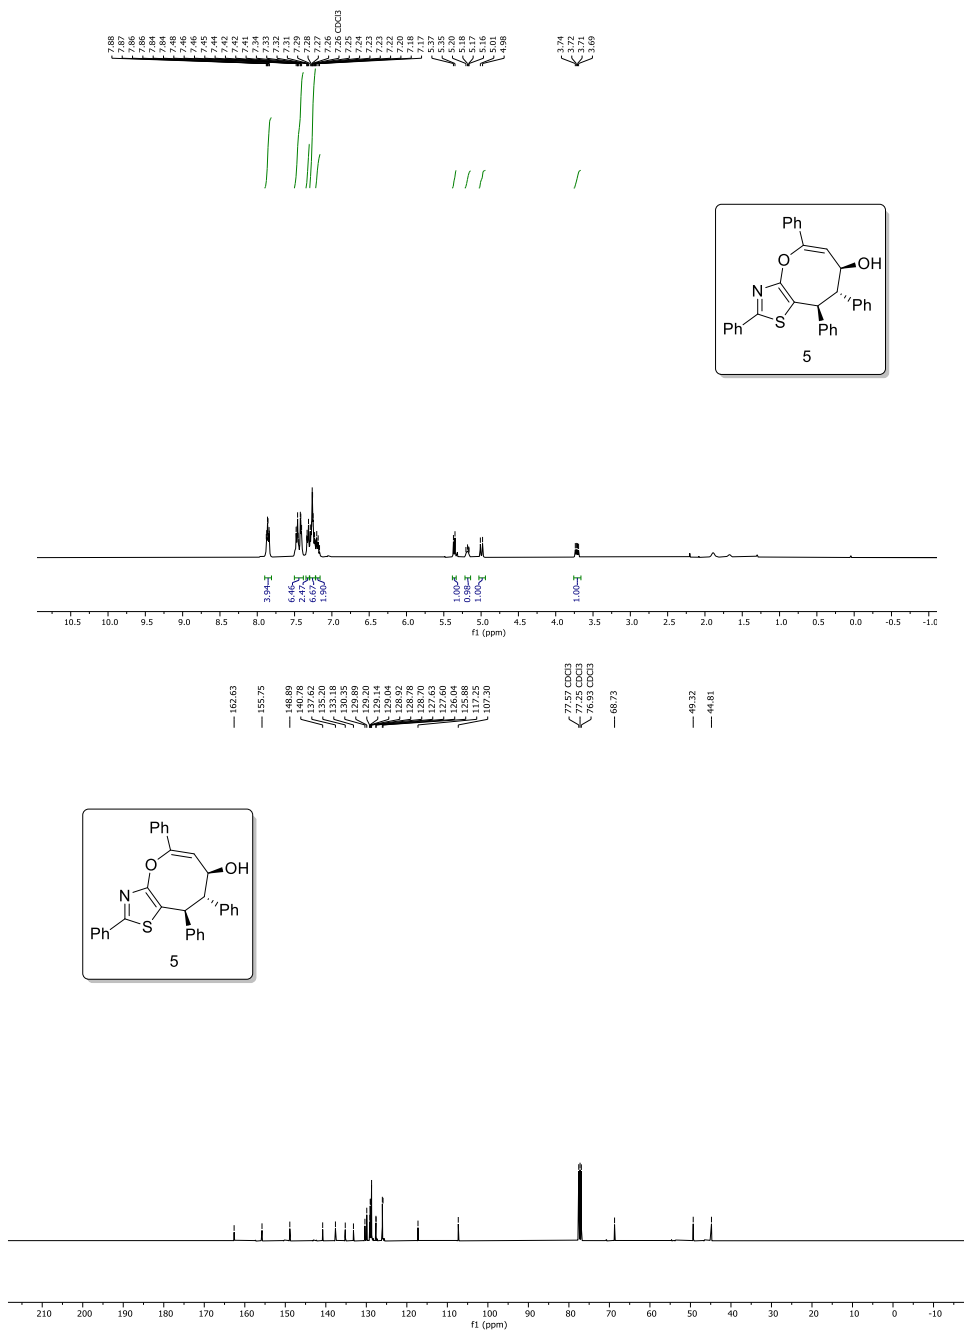

(8R,9S,Z)-7-methylene-2,5,8,9-tetraphenyl-8,9-dihydro-7H-oxocino[2,3-d]thiazole (6)

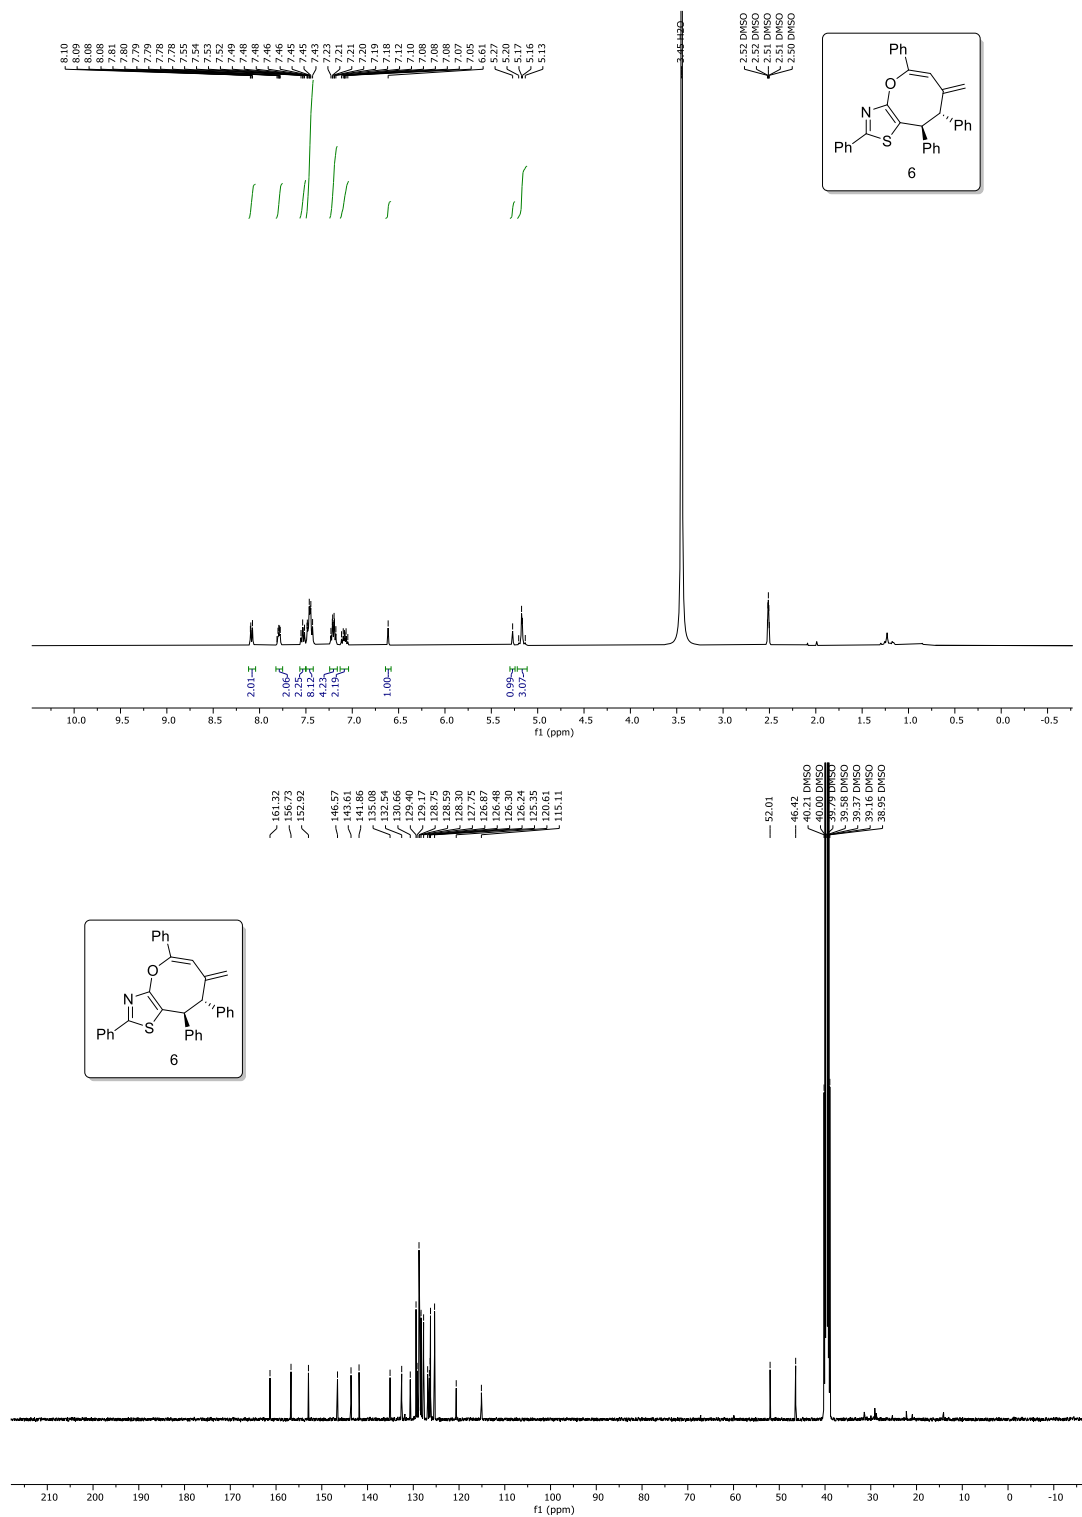

### 11. HPLC chromatogram:

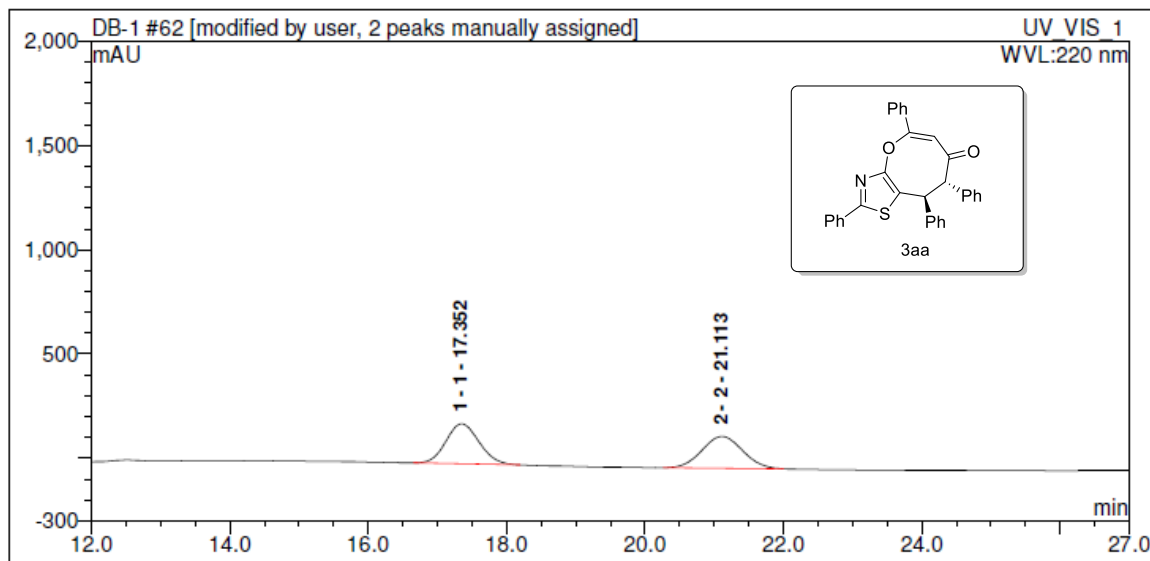

| No. | Peak Name | Ret.Time (detected)<br>min | Area<br>mAU*min | Rel.Area(ident.)<br>% | Height<br>mAU | Amount |
|-----|-----------|----------------------------|-----------------|-----------------------|---------------|--------|
| 1   | 1         | 17.35166667                | 106.4364        | 50.60708692           | 191.7717      | n.a.   |
| 2   | 2         | 21.11333333                | 103.8828        | 49.39291308           | 152.5382      | n.a.   |

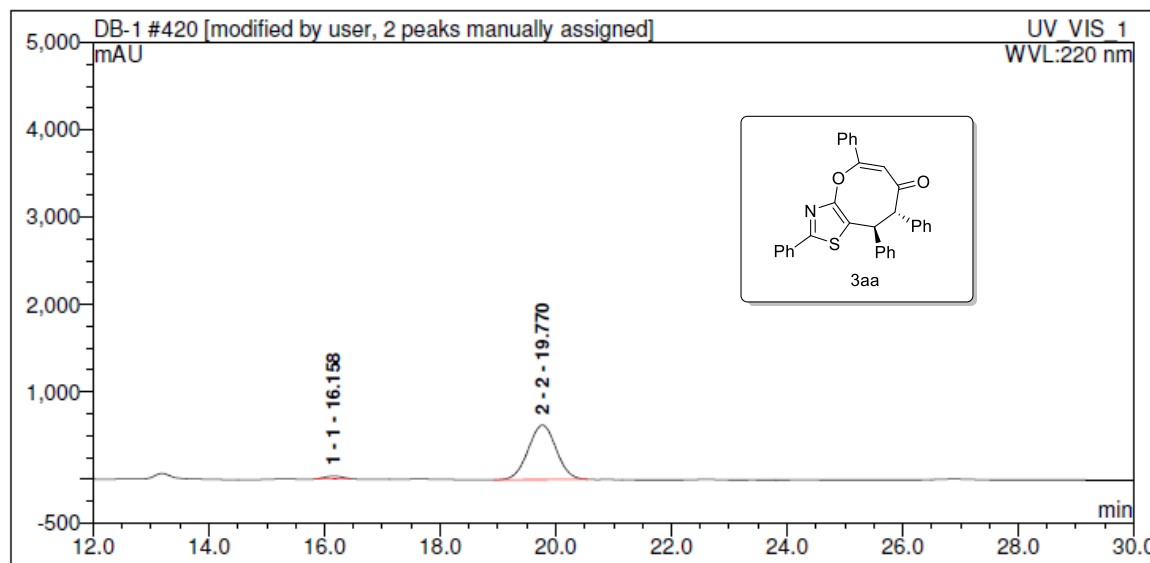

| No. | Peak Name | Ret.Time (detected)<br>min | Area<br>mAU*min | Rel.Area(ident.)<br>% | Height<br>mAU | Amount |
|-----|-----------|----------------------------|-----------------|-----------------------|---------------|--------|
| 1   | 1         | 16.15833333                | 10.11327        | 2.817583151           | 30.42845      | n.a.   |
| 2   | 2         | 19.77                      | 348.8209        | 97.18241685           | 622.4742      | n.a.   |

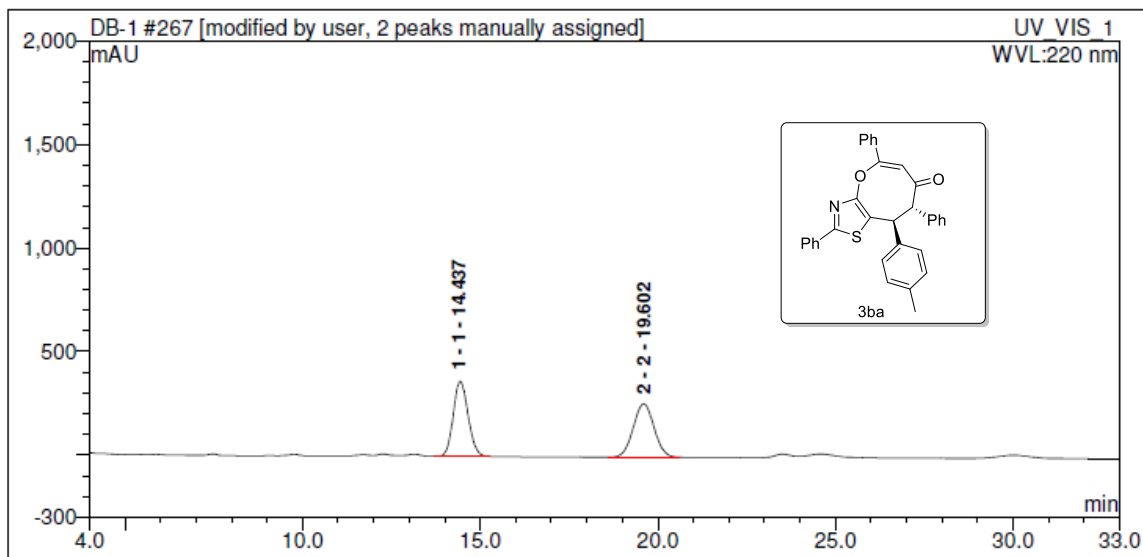

| No. | Peak Name | Ret.Time (detected)<br>min | Area<br>mAU*min | Rel.Area(ident.)<br>% | Height<br>mAU | Amount |
|-----|-----------|----------------------------|-----------------|-----------------------|---------------|--------|
| 1   | 1         | 14.4366667                 | 176.1525        | 50.20674305           | 362.8765      | n.a.   |
| 2   | 2         | 19.6016667                 | 174.7017        | 49.79325695           | 257.8816      | n.a.   |

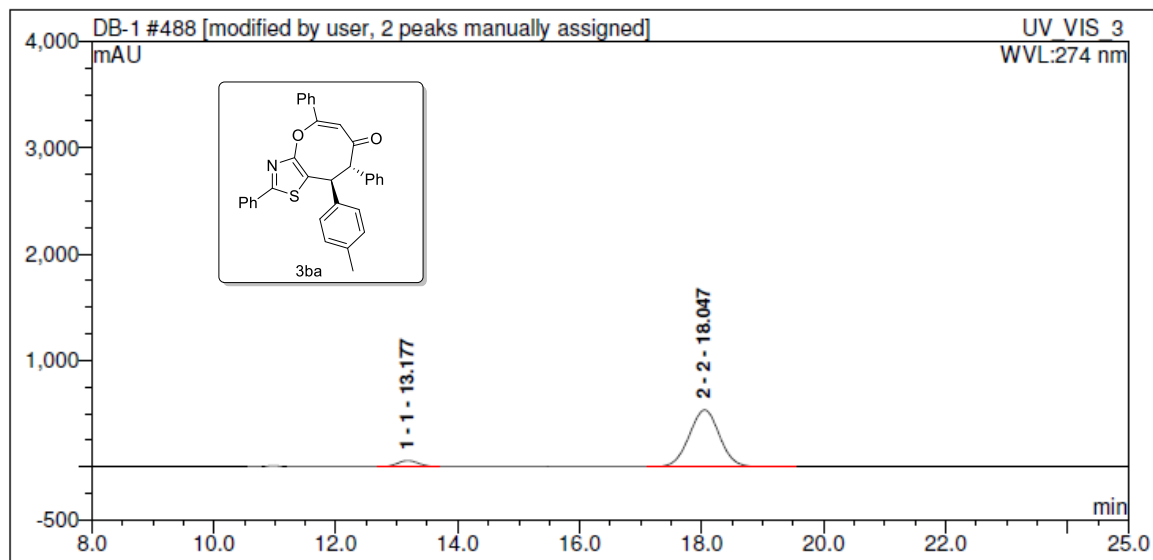

| No. | Peak Name | Ret.Time (detected)<br>min | Area<br>mAU*min | Rel.Area(ident.)<br>% | Height<br>mAU | Amount |
|-----|-----------|----------------------------|-----------------|-----------------------|---------------|--------|
| 1   | 1         | 13.1766667                 | 22.78326        | 6.913494427           | 57.57419      | n.a.   |
| 2   | 2         | 18.0466667                 | 306.7644        | 93.08650557           | 532.7118      | n.a.   |

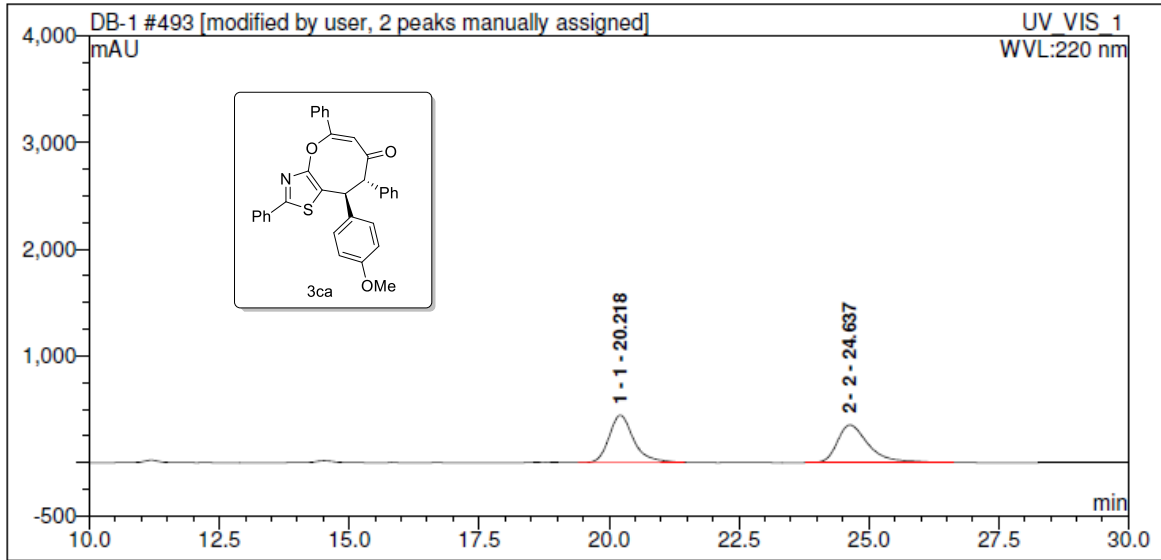

| No. | Peak Name | Ret.Time (detected)<br>min | Area<br>mAU*min | Rel.Area(ident.)<br>% | Height<br>mAU | Amount |
|-----|-----------|----------------------------|-----------------|-----------------------|---------------|--------|
| 1   | 1         | 20.21833333                | 242.6664        | 49.63613199           | 443.0755      | n.a.   |
| 2   | 2         | 24.63666667                | 246.2242        | 50.36386801           | 351.6315      | n.a.   |

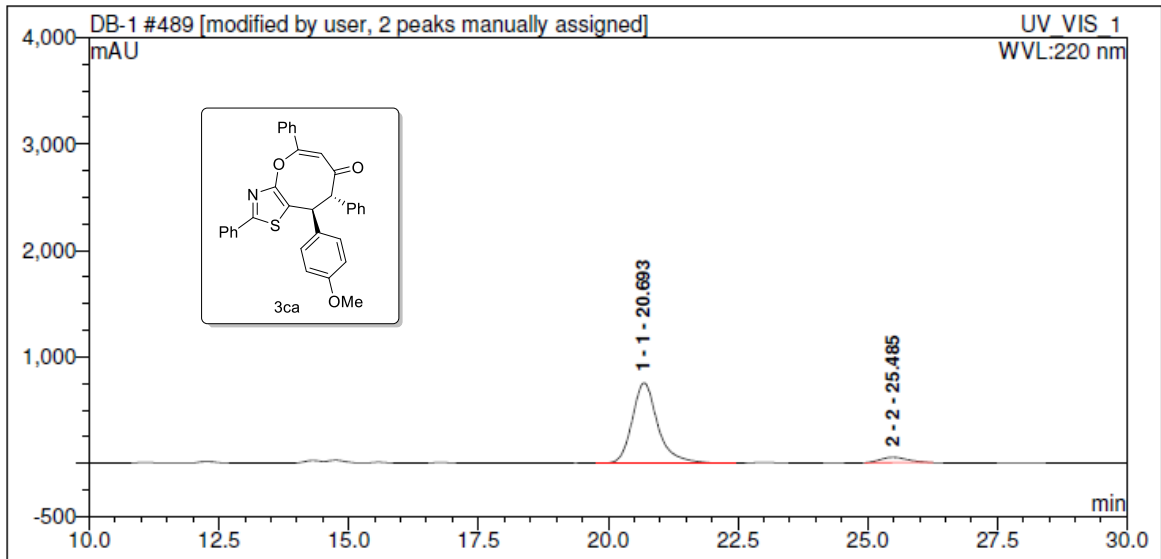

| No. | Peak Name | Ret.Time (detected)<br>min | Area<br>mAU*min | Rel.Area(ident.)<br>% | Height<br>mAU | Amount |
|-----|-----------|----------------------------|-----------------|-----------------------|---------------|--------|
| 1   | 1         | 20.69333333                | 429.1134        | 93.44591037           | 752.491       | n.a.   |
| 2   | 2         | 25.485                     | 30.09707        | 6.554089627           | 49.77677      | n.a.   |

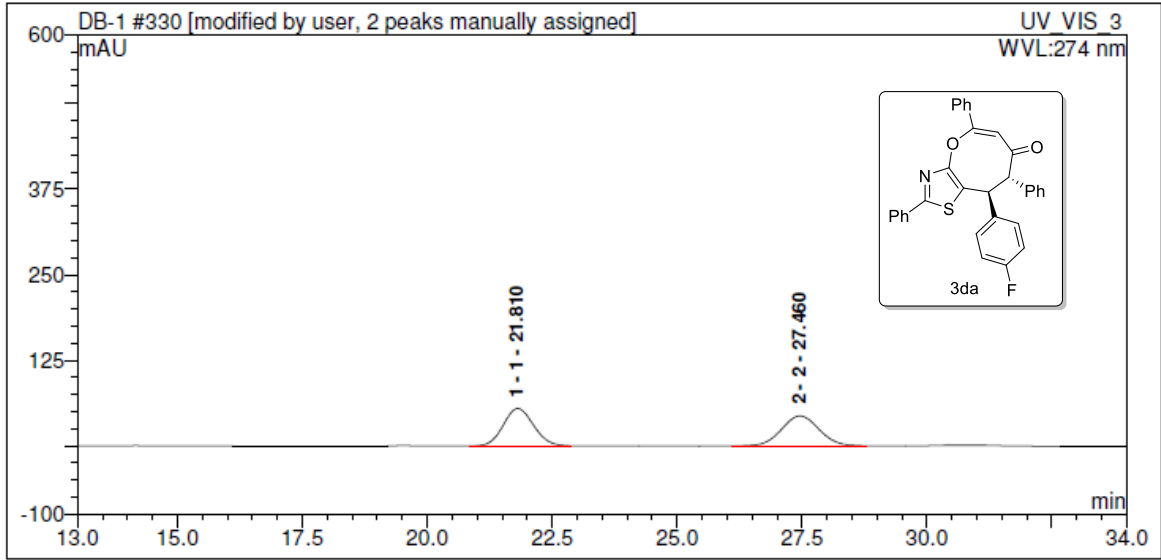

| No. | Peak Name | Ret.Time (detected)<br>min | Area<br>mAU*min | Rel.Area(ident.)<br>% | Height<br>mAU | Amount |
|-----|-----------|----------------------------|-----------------|-----------------------|---------------|--------|
| 1   | 1         | 21.81                      | 38.18904        | 50.19442157           | 54.48512      | n.a.   |
| 2   | 2         | 27.46                      | 37.8932         | 49.80557843           | 43.59817      | n.a.   |

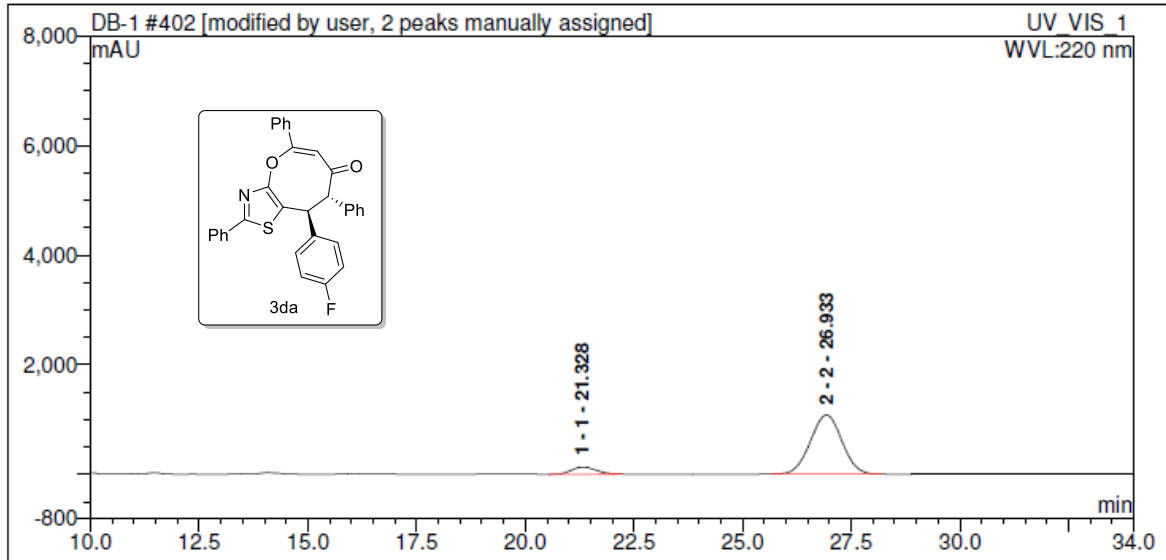

| No. | Peak Name | Ret.Time (detected)<br>min | Area<br>mAU*min | Rel.Area(ident.)<br>% | Height<br>mAU | Amount |
|-----|-----------|----------------------------|-----------------|-----------------------|---------------|--------|
| 1   | 1         | 21.32833333                | 89.53858        | 8.962394854           | 133.1819      | n.a.   |
| 2   | 2         | 26.93333333                | 909.5089        | 91.03760515           | 1078.929      | n.a.   |

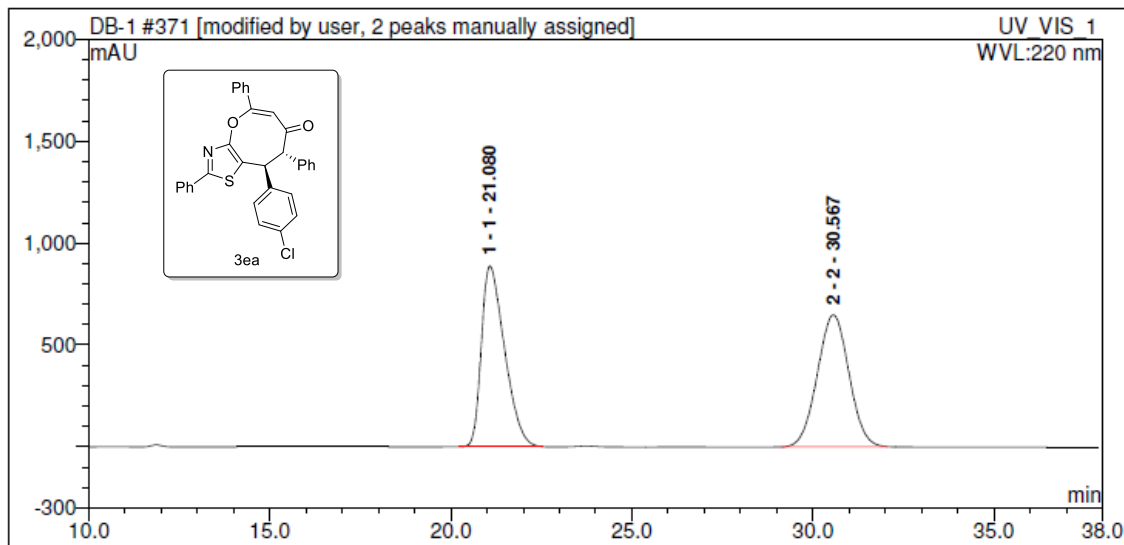

| No. | Peak Name | Ret.Time (detected)<br>min | Area<br>mAU*min | Rel.Area(ident.)<br>% | Height<br>mAU | Amount |
|-----|-----------|----------------------------|-----------------|-----------------------|---------------|--------|
| 1   | 1         | 21.08                      | 657.4999        | 50.07525316           | 887.3239      | n.a.   |
| 2   | 2         | 30.56666667                | 655.5237        | 49.92474684           | 646.6083      | n.a.   |

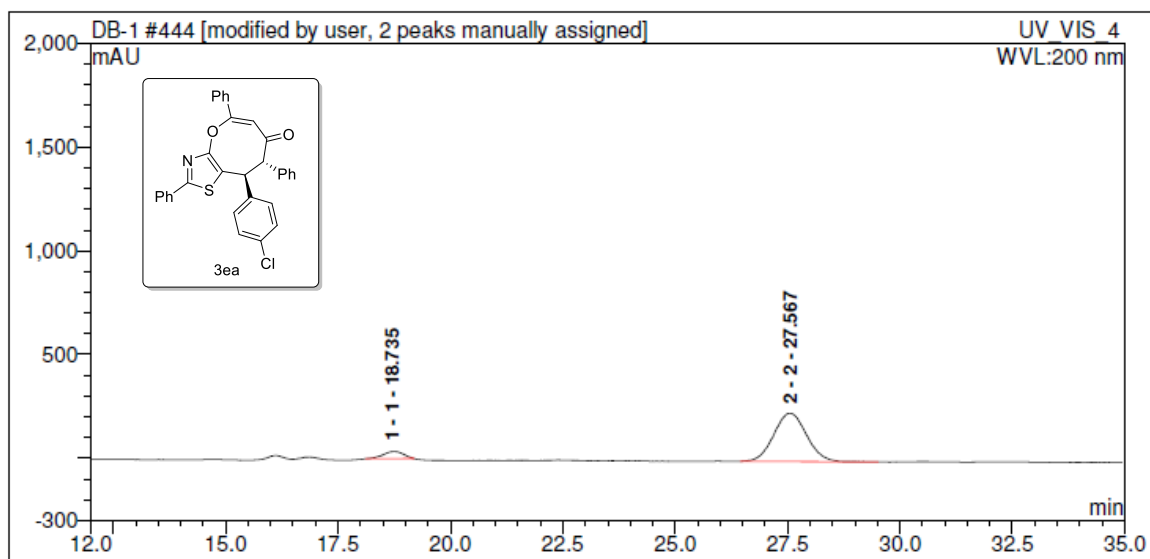

| No. | Peak Name | Ret.Time (detected)<br>min | Area<br>mAU*min | Rel.Area(ident.)<br>% | Height<br>mAU | Amount |
|-----|-----------|----------------------------|-----------------|-----------------------|---------------|--------|
| 1   | 1         | 18.735                     | 17.78109        | 8.334395584           | 34.40759      | n.a.   |
| 2   | 2         | 27.56666667                | 195.5648        | 91.66560442           | 231.9828      | n.a.   |

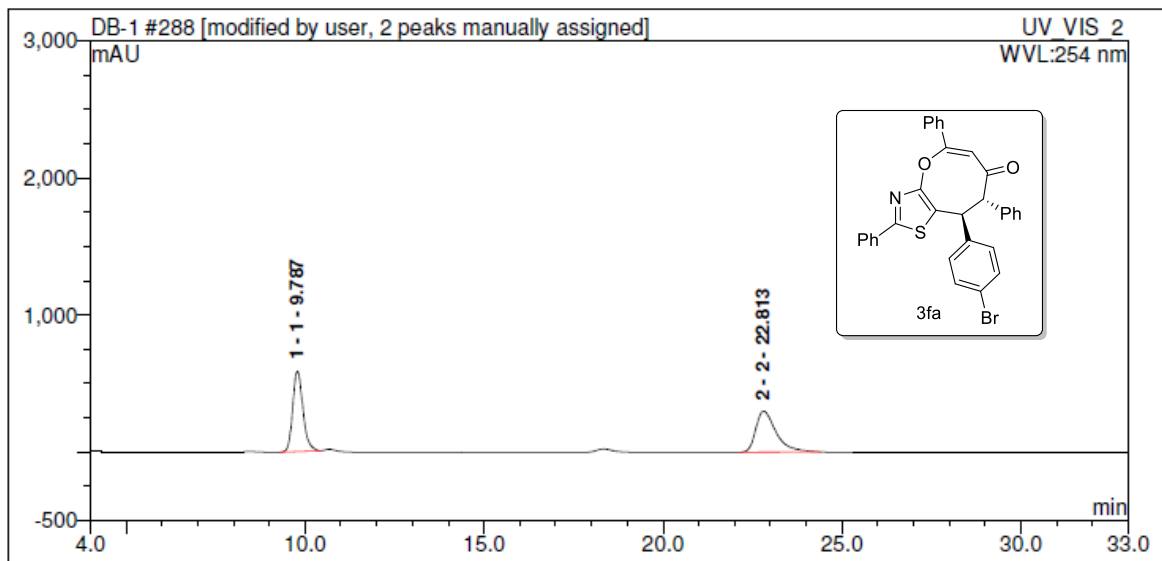

| No. | Peak Name | Ret.Time (detected)<br>min | Area<br>mAU*min | Rel.Area(ident.)<br>% | Height<br>mAU | Amount |
|-----|-----------|----------------------------|-----------------|-----------------------|---------------|--------|
| 1   | 1         | 9.78666667                 | 194.5341        | 49.74078791           | 585.5839      | n.a.   |
| 2   | 2         | 22.81333333                | 196.5616        | 50.25921209           | 298.5214      | n.a.   |

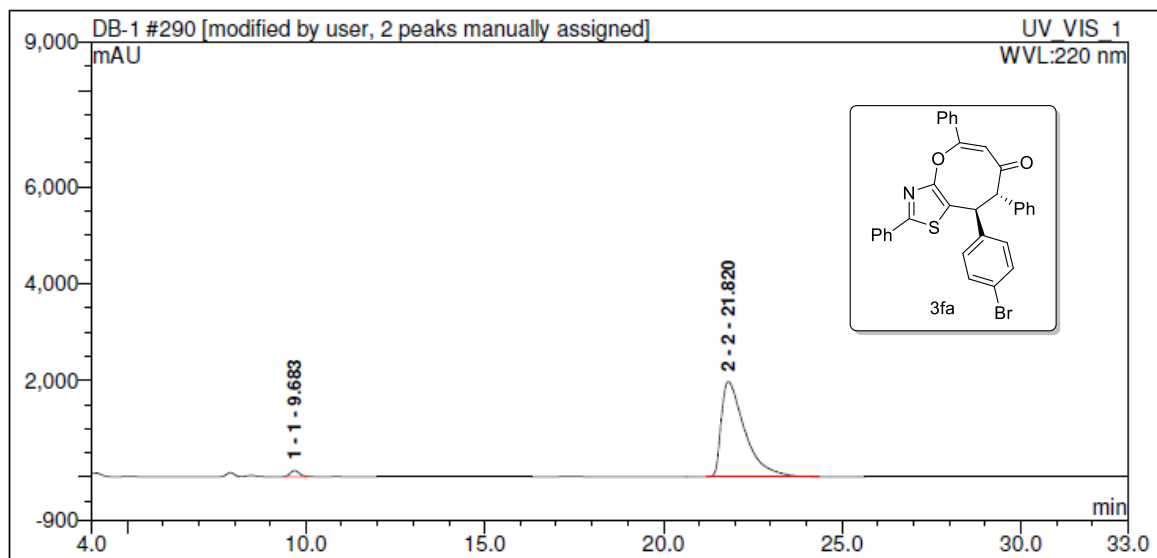

| No. | Peak Name | Ret.Time (detected)<br>min | Area<br>mAU*min | Rel.Area(ident.)<br>% | Height<br>mAU | Amount |
|-----|-----------|----------------------------|-----------------|-----------------------|---------------|--------|
| 1   | 1         | 9.683333333                | 37.22869        | 2.399329963           | 125.3346      | n.a.   |
| 2   | 2         | 21.82                      | 1514.4          | 97.60067004           | 1972.957      | n.a.   |

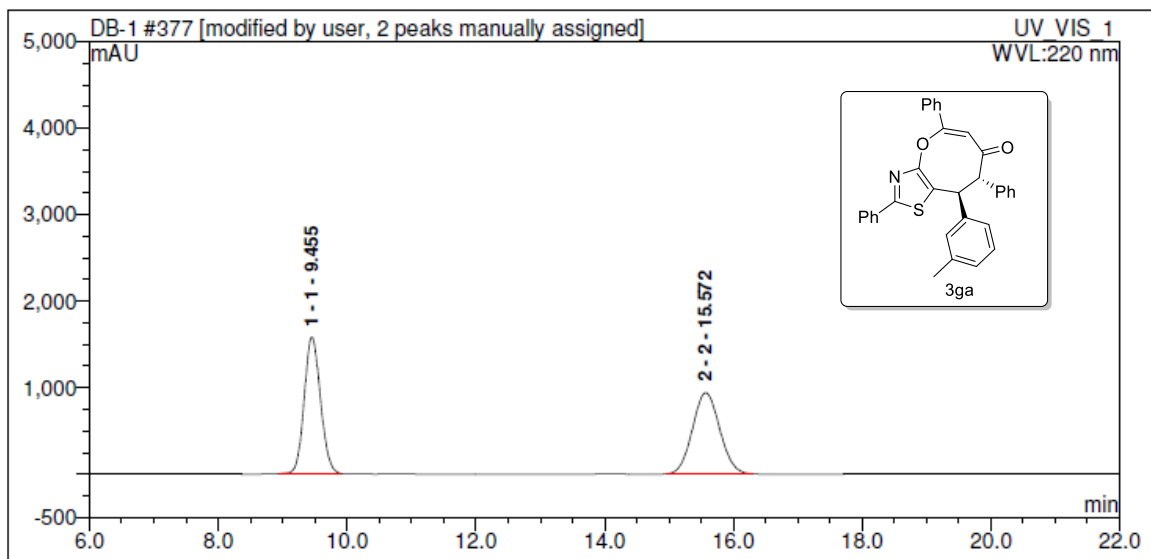

| No. | Peak Name | Ret.Time (detected)<br>min | Area<br>mAU*min | Rel.Area(ident.)<br>% | Height<br>mAU | Amount |
|-----|-----------|----------------------------|-----------------|-----------------------|---------------|--------|
| 1   | 1         | 9.455                      | 460.1083        | 49.95426097           | 1574.255      | n.a.   |
| 2   | 2         | 15.57166667                | 460.9509        | 50.04573903           | 937.5053      | n.a.   |

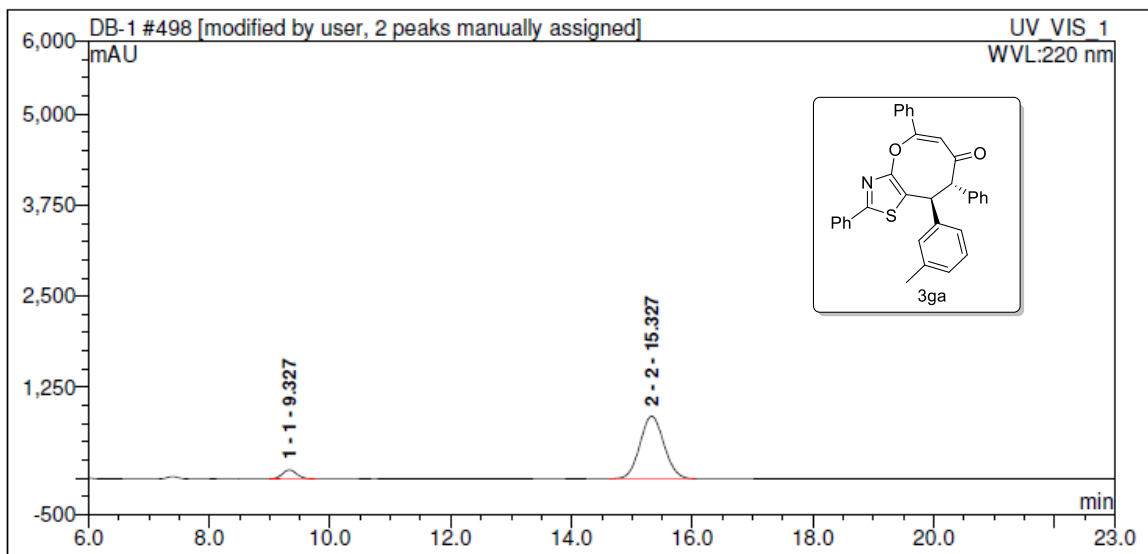

| No. | Peak Name | Ret.Time (detected)<br>min | Area<br>mAU*min | Rel.Area(ident.)<br>% | Height<br>mAU | Amount |
|-----|-----------|----------------------------|-----------------|-----------------------|---------------|--------|
| 1   | 1         | 9.326666667                | 34.66019        | 8.076279643           | 122.6311      | n.a.   |
| 2   | 2         | 15.32666667                | 394.5002        | 91.92372036           | 856.9588      | n.a.   |

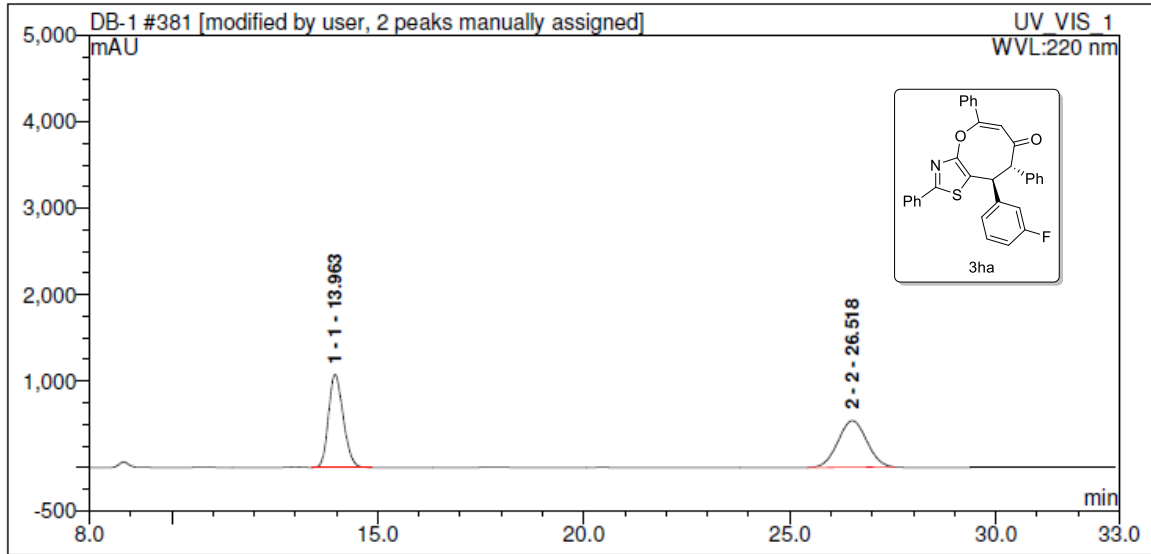

| No. | Peak Name | Ret.Time (detected)<br>min | Area<br>mAU*min | Rel.Area(ident.)<br>% | Height<br>mAU | Amount |
|-----|-----------|----------------------------|-----------------|-----------------------|---------------|--------|
| 1   | 1         | 13.96333333                | 447.5866        | 50.690891             | 1075.339      | n.a.   |
| 2   | 2         | 26.51833333                | 435.3858        | 49.309109             | 537.2867      | n.a.   |

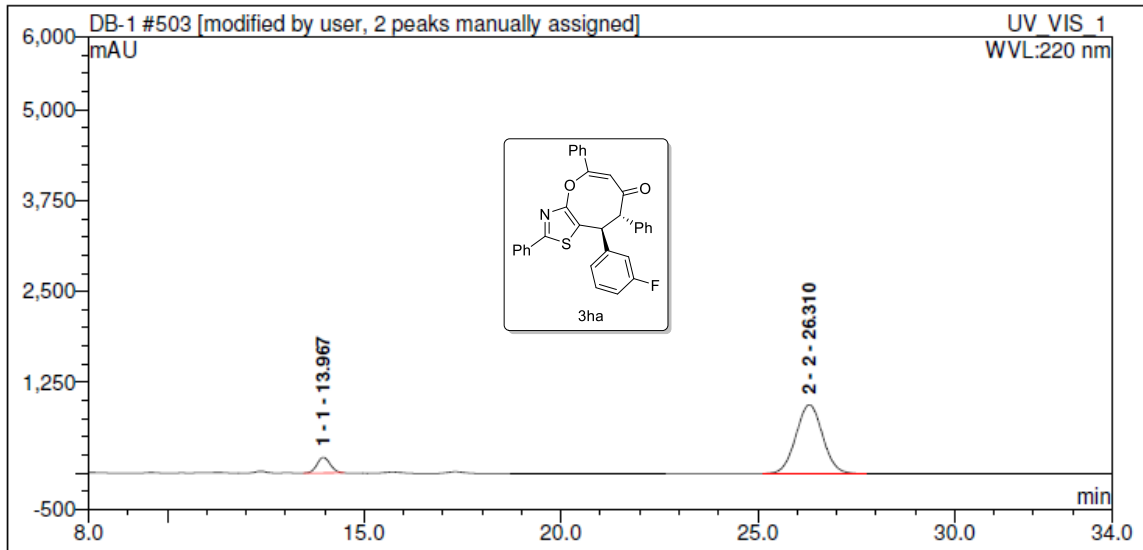

| No. | Peak Name | Ret.Time (detected)<br>min | Area<br>mAU*min | Rel.Area(ident.)<br>% | Height<br>mAU | Amount |
|-----|-----------|----------------------------|-----------------|-----------------------|---------------|--------|
| 1   | 1         | 13.96666667                | 83.17734        | 10.08022375           | 215.4835      | n.a.   |
| 2   | 2         | 26.31                      | 741.9763        | 89.91977625           | 944.018       | n.a.   |

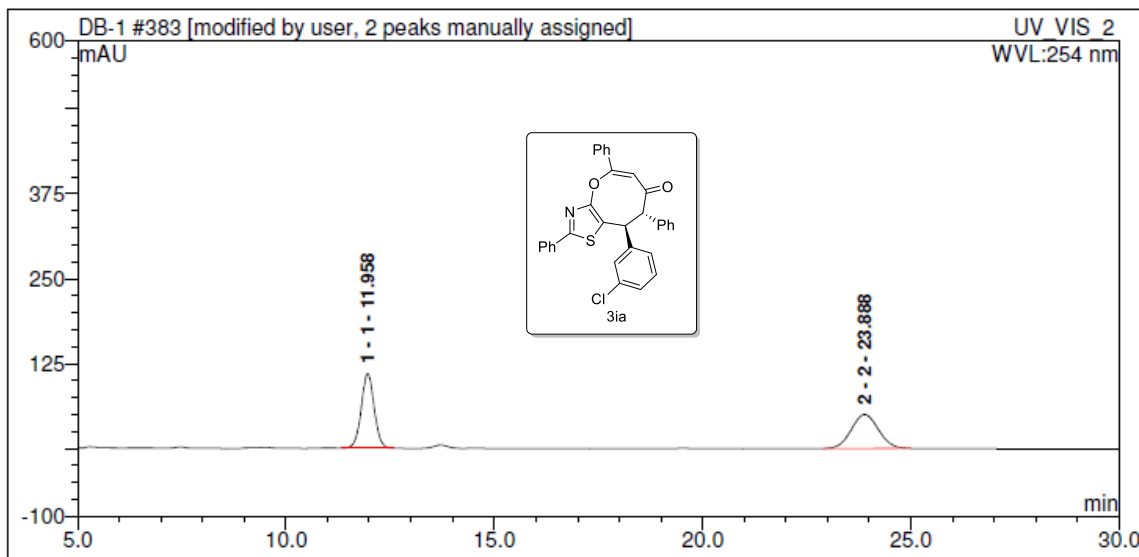

| No. | Peak Name | Ret.Time (detected)<br>min | Area<br>mAU*min | Rel.Area(ident.)<br>% | Height<br>mAU | Amount |
|-----|-----------|----------------------------|-----------------|-----------------------|---------------|--------|
| 1   | 1         | 11.95833333                | 39.80825        | 51.36584493           | 109.9952      | n.a.   |
| 2   | 2         | 23.88833333                | 37.69121        | 48.63415507           | 49.8674       | n.a.   |

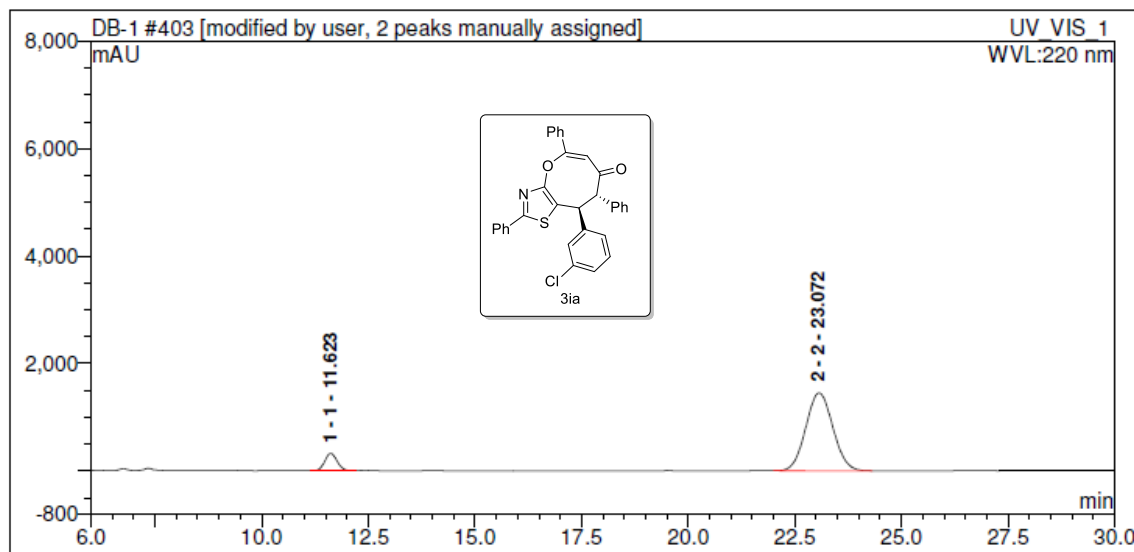

| No. | Peak Name | Ret.Time (detected)<br>min | Area<br>mAU*min | Rel.Area(ident.)<br>% | Height<br>mAU | Amount |
|-----|-----------|----------------------------|-----------------|-----------------------|---------------|--------|
| 1   | 1         | 11.62333333                | 109.4862        | 9.28024163            | 323.5075      | n.a.   |
| 2   | 2         | 23.07166667                | 1070.291        | 90.71975837           | 1449.031      | n.a.   |

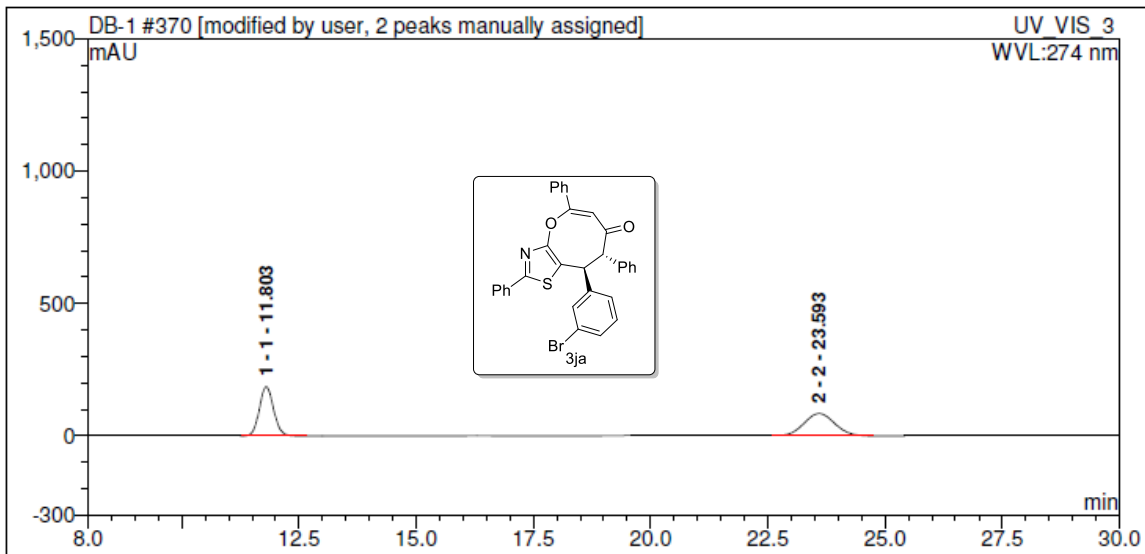

| No. | Peak Name | Ret.Time (detected)<br>min | Area<br>mAU*min | Rel.Area(ident.)<br>% | Height<br>mAU | Amount |
|-----|-----------|----------------------------|-----------------|-----------------------|---------------|--------|
| 1   | 1         | 11.80333333                | 65.26951        | 50.23993413           | 185.8989      | n.a.   |
| 2   | 2         | 23.59333333                | 64.64608        | 49.76006587           | 84.54416      | n.a.   |

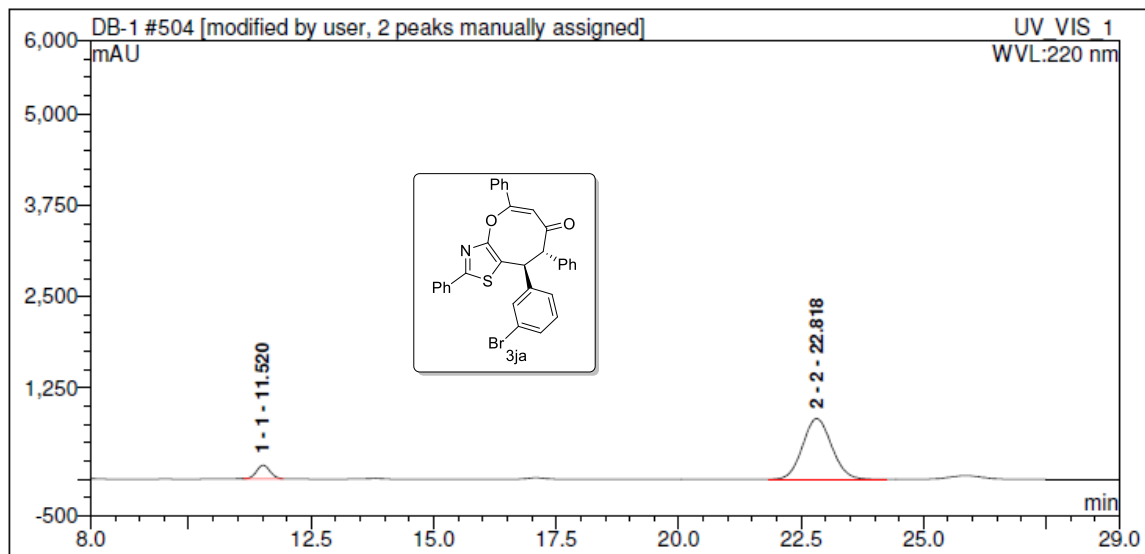

| No. | Peak Name | Ret.Time (detected)<br>min | Area<br>mAU*min | Rel.Area(ident.)<br>% | Height<br>mAU | Amount |
|-----|-----------|----------------------------|-----------------|-----------------------|---------------|--------|
| 1   | 1         | 11.52                      | 59.01651        | 9.38543263            | 185.2792      | n.a.   |
| 2   | 2         | 22.81833333                | 569.7932        | 90.61456737           | 828.2034      | n.a.   |

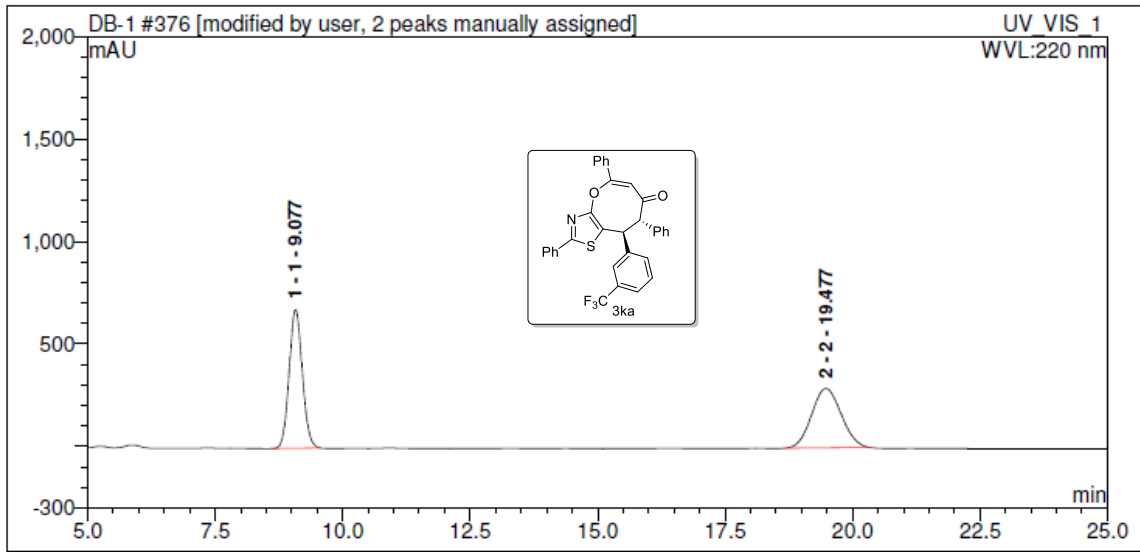

| No. | Peak Name | Ret.Time (detected)<br>min | Area<br>mAU*min | Rel.Area(ident.)<br>% | Height<br>mAU | Amount |
|-----|-----------|----------------------------|-----------------|-----------------------|---------------|--------|
| 1   | 1         | 9.07666667                 | 203.3841        | 50.99014078           | 675.6496      | n.a.   |
| 2   | 2         | 19.47666667                | 195.4854        | 49.00985922           | 290.251       | n.a.   |

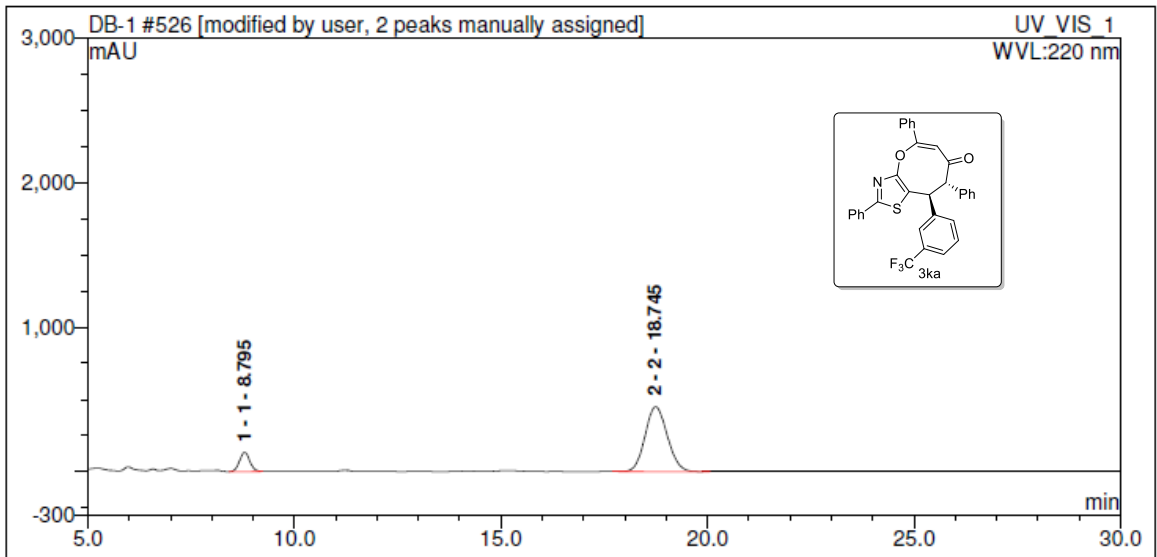

| No. | Peak Name | Ret.Time (detected)<br>min | Area<br>mAU*min | Rel.Area(ident.)<br>% | Height<br>mAU | Amount |
|-----|-----------|----------------------------|-----------------|-----------------------|---------------|--------|
| 1   | 1         | 8.795                      | 38.12632        | 11.94718206           | 132.962       | n.a.   |
| 2   | 2         | 18.745                     | 280.9976        | 88.05281794           | 448.5583      | n.a.   |

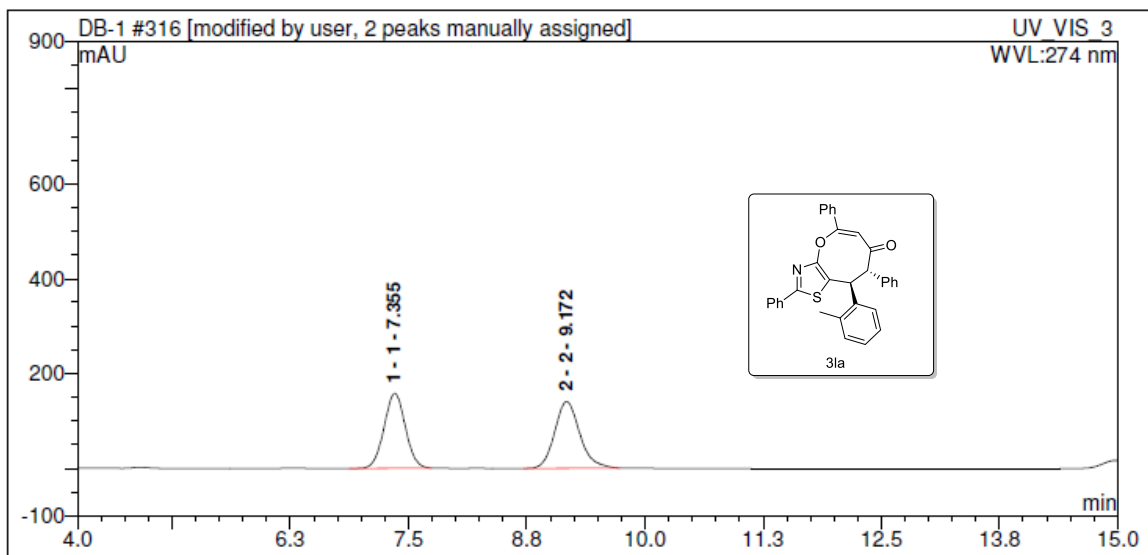

| No. | Peak Name | Ret.Time (detected)<br>min | Area<br>mAU*min | Rel.Area(ident.)<br>% | Height<br>mAU | Amount |
|-----|-----------|----------------------------|-----------------|-----------------------|---------------|--------|
| 1   | 1         | 7.355                      | 41.21251        | 48.78314016           | 157.7822      | n.a.   |
| 2   | 2         | 9.171666667                | 43.26854        | 51.21685984           | 140.5686      | n.a.   |

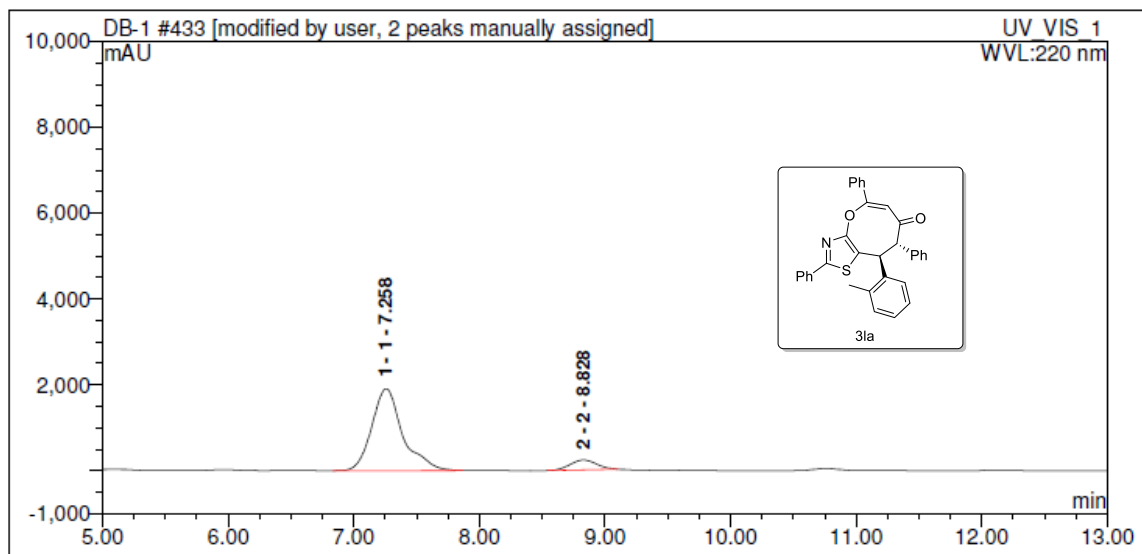

| No. | Peak Name | Ret.Time (detected)<br>min | Area<br>mAU*min | Rel.Area(ident.)<br>% | Height<br>mAU | Amount |
|-----|-----------|----------------------------|-----------------|-----------------------|---------------|--------|
| 1   | 1         | 7.258333333                | 543.8524        | 90.60856719           | 1906.372      | n.a.   |
| 2   | 2         | 8.828333333                | 56.36943        | 9.391432811           | 229.3882      | n.a.   |

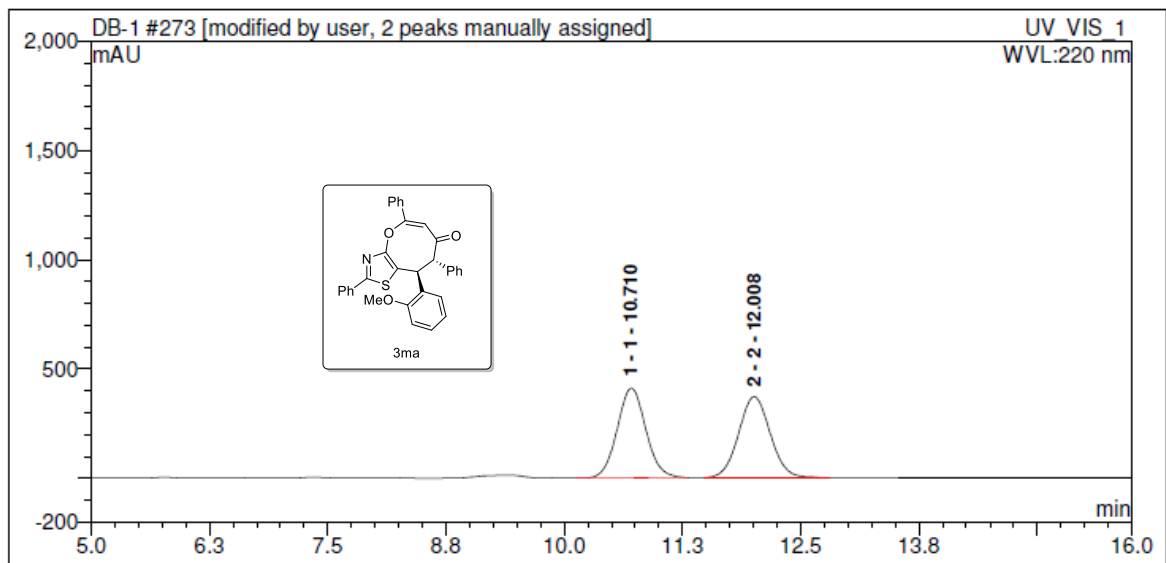

| No. | Peak Name | Ret.Time (detected) min | Area mAU*min | Rel.Area(ident.) % | Height mAU | Amount |
|-----|-----------|-------------------------|--------------|--------------------|------------|--------|
| 1   | 1         | 10.71                   | 144.1027     | 49.89665394        | 410.405    | n.a.   |
| 2   | 2         | 12.00833333             | 144.6996     | 50.10334606        | 371.3042   | n.a.   |

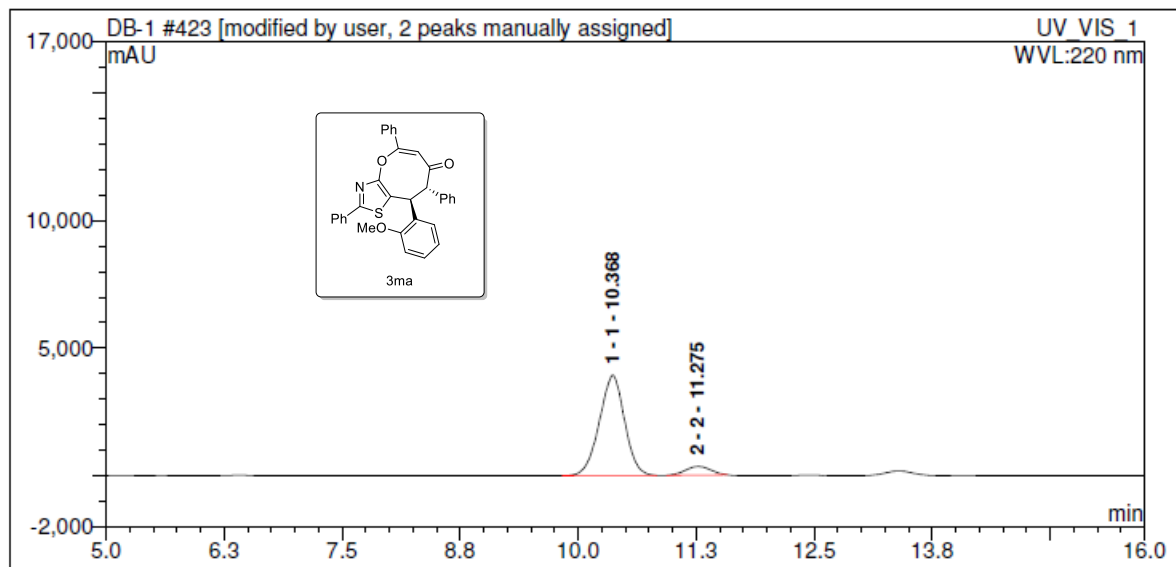

| No. | Peak Name | Ret.Time (detected) min | Area mAU*min | Rel.Area(ident.) % | Height mAU | Amount |
|-----|-----------|-------------------------|--------------|--------------------|------------|--------|
| 1   | 1         | 10.36833333             | 1214.701     | 92.14588503        | 3930.017   | n.a.   |
| 2   | 2         | 11.275                  | 103.5358     | 7.854114967        | 336.8867   | n.a.   |

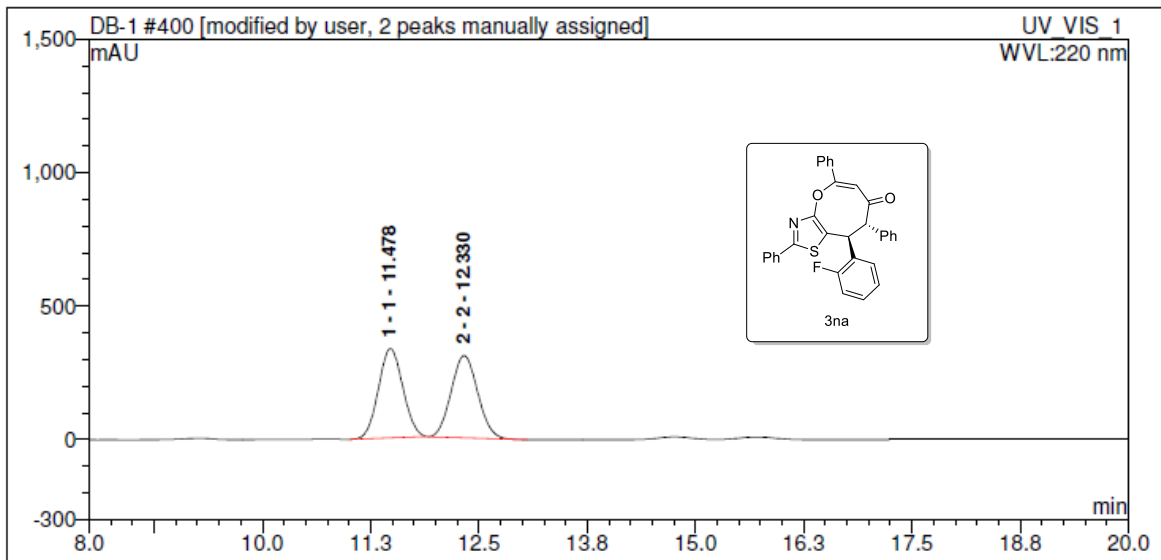

| No. | Peak Name | Ret.Time (detected)<br>min | Area<br>mAU*min | Rel.Area(ident.)<br>% | Height<br>mAU | Amount |
|-----|-----------|----------------------------|-----------------|-----------------------|---------------|--------|
| 1   | 1         | 11.47833333                | 108.9214        | 49.93533316           | 333.7097      | n.a.   |
| 2   | 2         | 12.33                      | 109.2035        | 50.06466684           | 307.5974      | n.a.   |

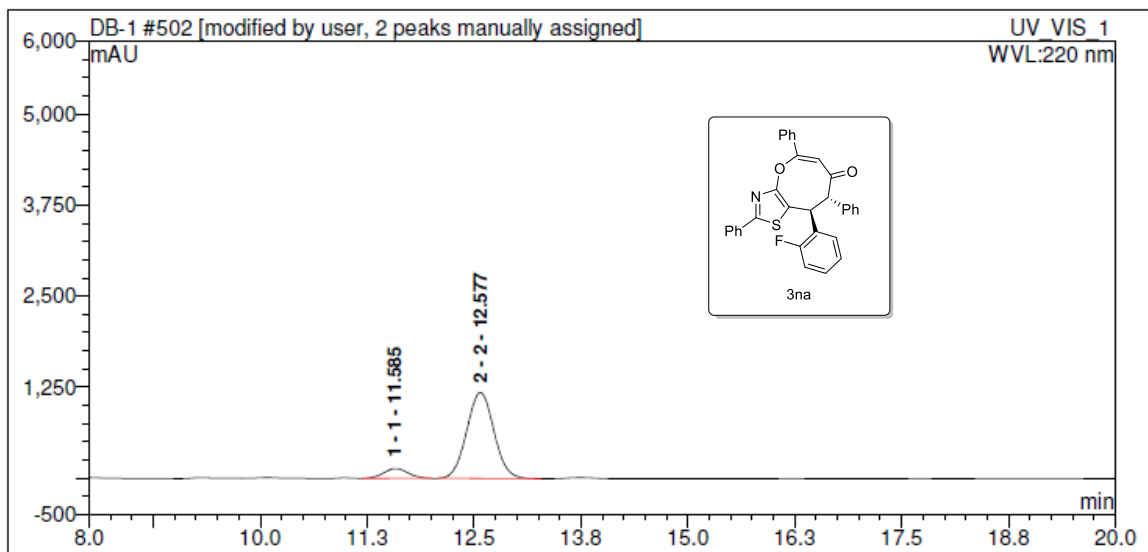

| No. | Peak Name | Ret.Time (detected)<br>min | Area<br>mAU*min | Rel.Area(ident.)<br>% | Height<br>mAU | Amount |
|-----|-----------|----------------------------|-----------------|-----------------------|---------------|--------|
| 1   | 1         | 11.585                     | 43.80093        | 9.146149762           | 133.5295      | n.a.   |
| 2   | 2         | 12.57666667                | 435.0993        | 90.85385024           | 1178.078      | n.a.   |

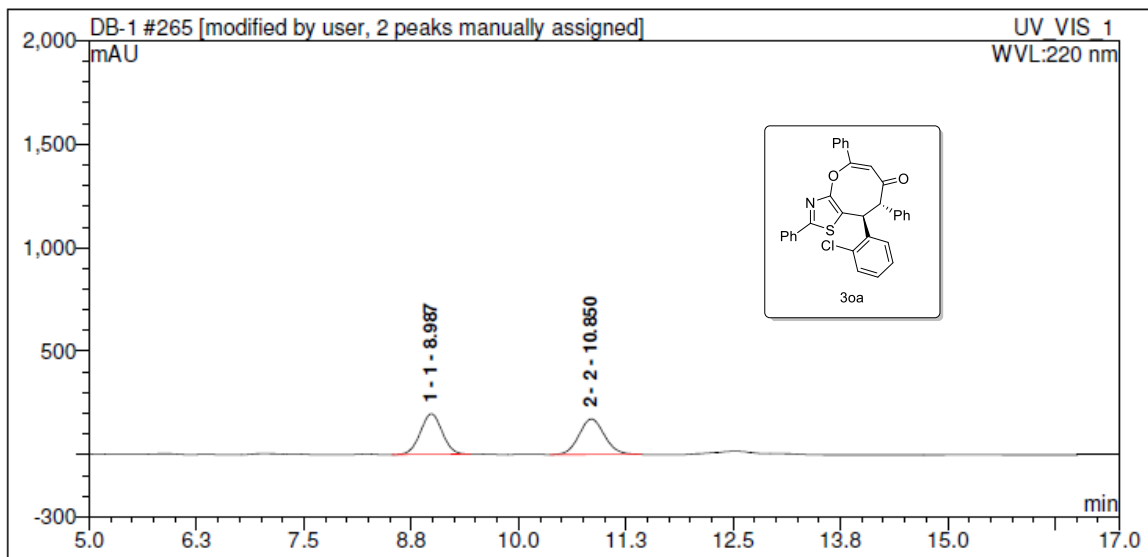

| No. | Peak Name | Ret.Time (detected)<br>min | Area<br>mAU*min | Rel.Area(ident.)<br>% | Height<br>mAU | Amount |
|-----|-----------|----------------------------|-----------------|-----------------------|---------------|--------|
| 1   | 1         | 8.98666667                 | 57.95822        | 49.67666275           | 195.7758      | n.a.   |
| 2   | 2         | 10.85                      | 58.7127         | 50.32333725           | 171.0845      | n.a.   |

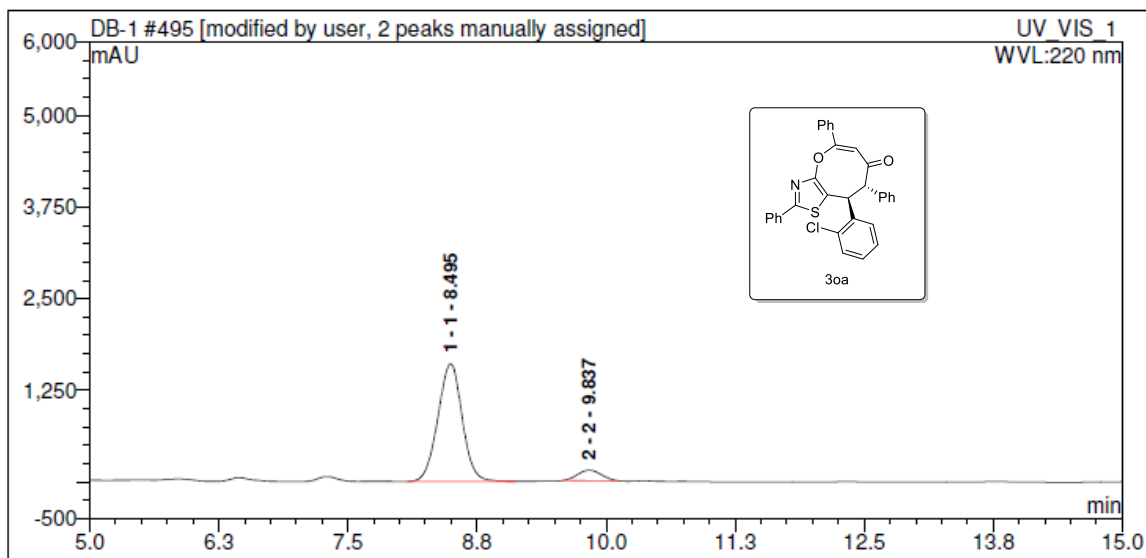

| No. | Peak Name | Ret.Time (detected)<br>min | Area<br>mAU*min | Rel.Area(ident.)<br>% | Height<br>mAU | Amount |
|-----|-----------|----------------------------|-----------------|-----------------------|---------------|--------|
| 1   | 1         | 8.495                      | 438.4296        | 92.05377775           | 1603.897      | n.a.   |
| 2   | 2         | 9.83666667                 | 37.84591        | 7.946222253           | 142.5984      | n.a.   |

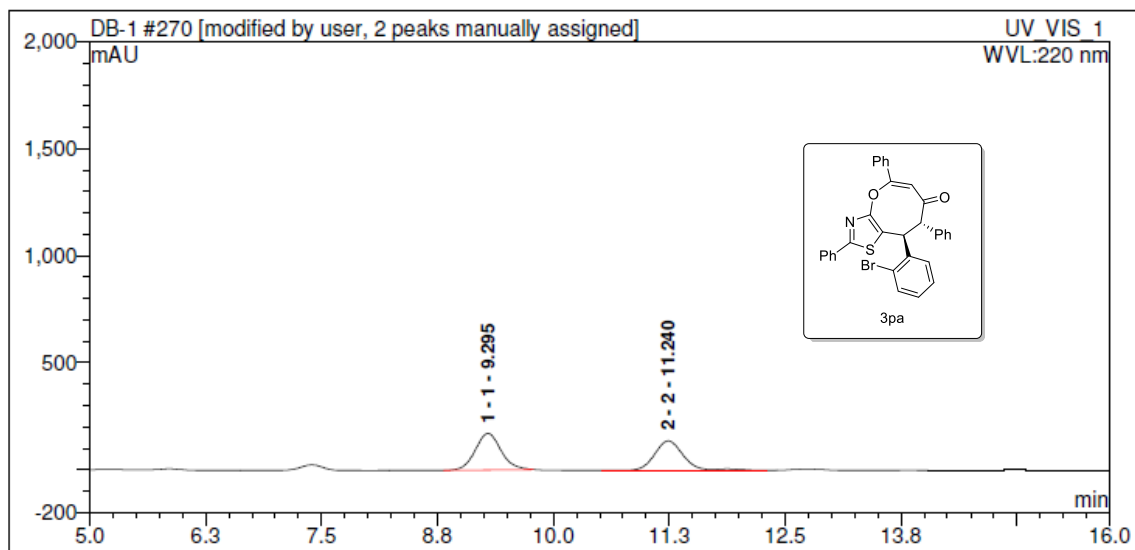

| No. | Peak Name | Ret.Time (detected)<br>min | Area<br>mAU*min | Rel.Area(ident.)<br>% | Height<br>mAU | Amount |
|-----|-----------|----------------------------|-----------------|-----------------------|---------------|--------|
| 1 1 |           | 9.295                      | 54.95431        | 52.20086934           | 170.5168      | n.a.   |
| 2 2 |           | 11.24                      | 50.32039        | 47.79913066           | 137.6529      | n.a.   |

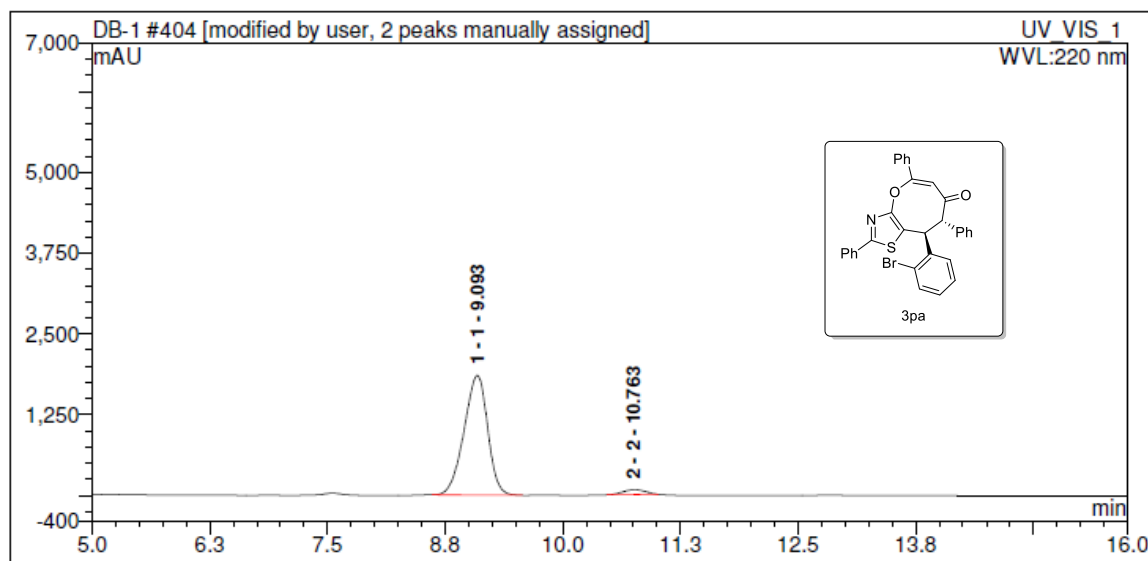

| No. | Peak Name | Ret.Time (detected)<br>min | Area<br>mAU*min | Rel.Area(ident.)<br>% | Height<br>mAU | Amount |
|-----|-----------|----------------------------|-----------------|-----------------------|---------------|--------|
| 1 1 |           | 9.093333333                | 539.5996        | 96.24931303           | 1850.598      | n.a.   |
| 2 2 |           | 10.76333333                | 21.02736        | 3.750686972           | 76.32585      | n.a.   |

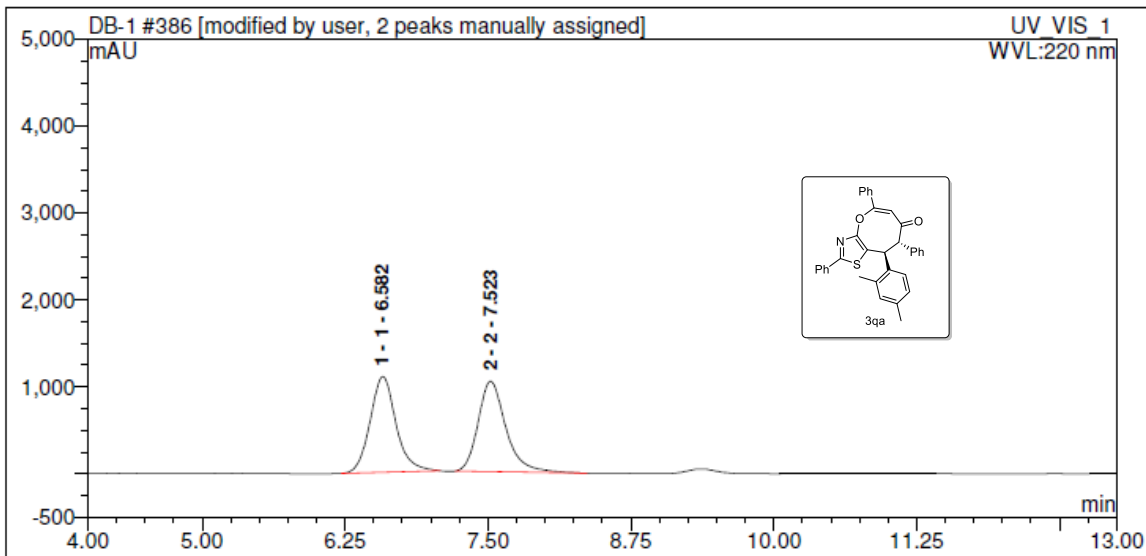

| No. | Peak Name | Ret.Time (detected)<br>min | Area<br>mAU*min | Rel.Area(ident.)<br>% | Height<br>mAU | Amount |
|-----|-----------|----------------------------|-----------------|-----------------------|---------------|--------|
| 1   | 1         | 6.581666667                | 289.8843        | 49.75066794           | 1101.691      | n.a.   |
| 2   | 2         | 7.523333333                | 292.7899        | 50.24933206           | 1038.528      | n.a.   |

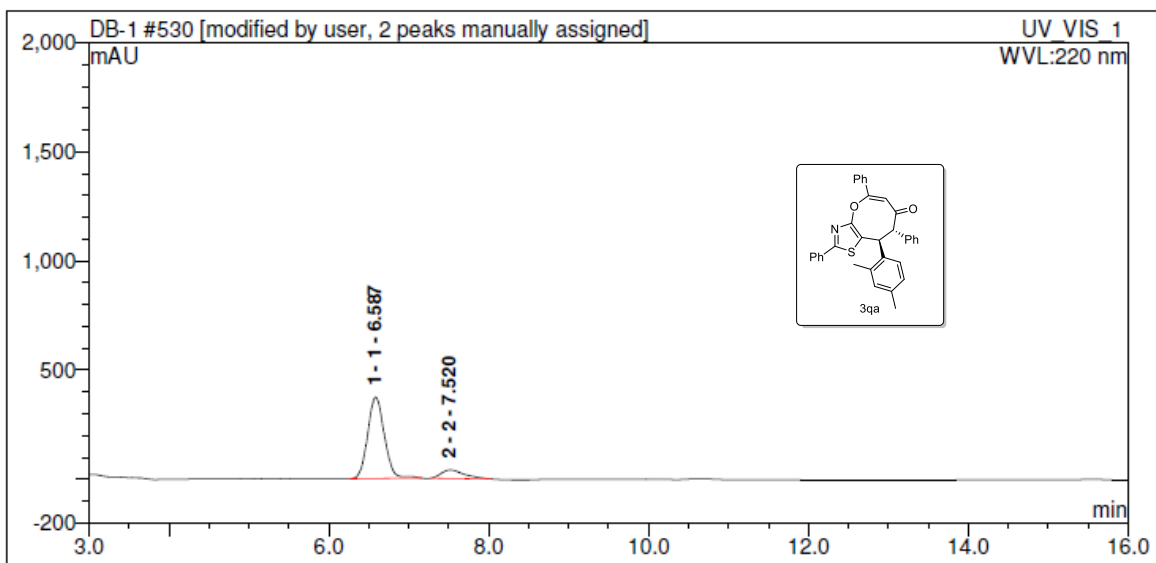

| No. | Peak Name | Ret.Time (detected)<br>min | Area<br>mAU*min | Rel.Area(ident.)<br>% | Height<br>mAU | Amount |
|-----|-----------|----------------------------|-----------------|-----------------------|---------------|--------|
| 1   | 1         | 6.586666667                | 90.25217        | 87.21274014           | 372.3257      | n.a.   |
| 2   | 2         | 7.52                       | 13.23291        | 12.78725986           | 39.42076      | n.a.   |

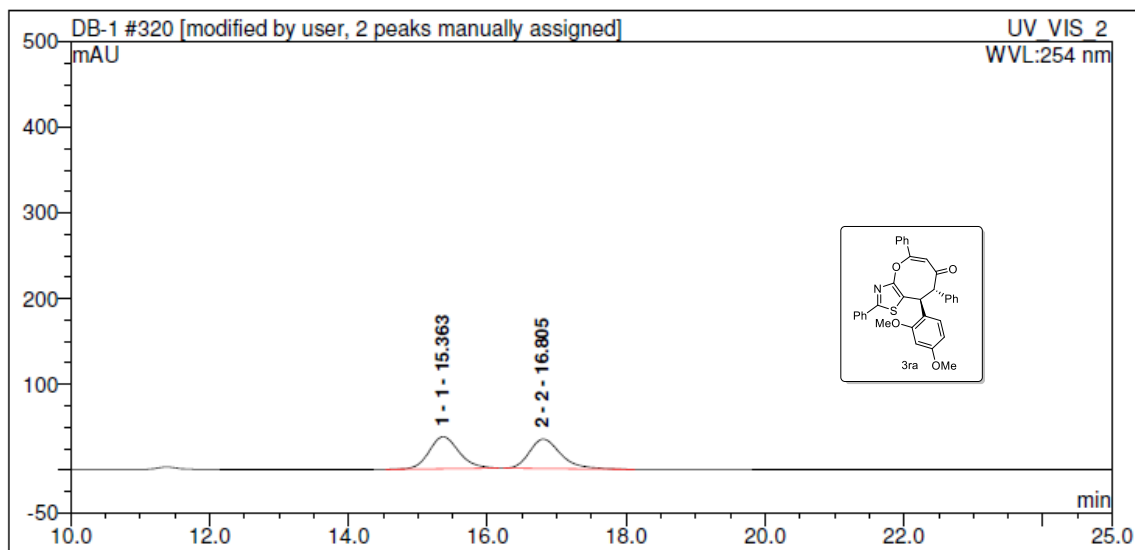

| No. | Peak Name | Ret.Time (detected)<br>min | Area<br>mAU*min | Rel.Area(ident.)<br>% | Height<br>mAU | Amount |
|-----|-----------|----------------------------|-----------------|-----------------------|---------------|--------|
| 1   | 1         | 15.36333333                | 18.53596        | 50.83570655           | 37.20559      | n.a.   |
| 2   | 2         | 16.805                     | 17.92652        | 49.16429345           | 34.27266      | n.a.   |

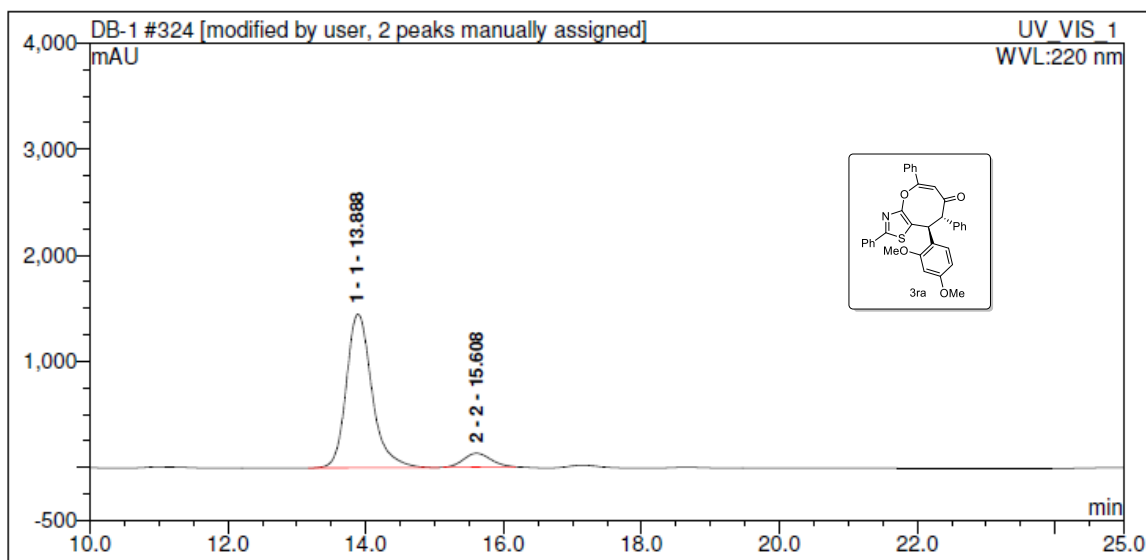

| No. | Peak Name | Ret.Time (detected)<br>min | Area<br>mAU*min | Rel.Area(ident.)<br>% | Height<br>mAU | Amount |
|-----|-----------|----------------------------|-----------------|-----------------------|---------------|--------|
| 1   | 1         | 13.88833333                | 625.0956        | 91.41585545           | 1446.785      | n.a.   |
| 2   | 2         | 15.60833333                | 58.69781        | 8.584144551           | 129.5889      | n.a.   |

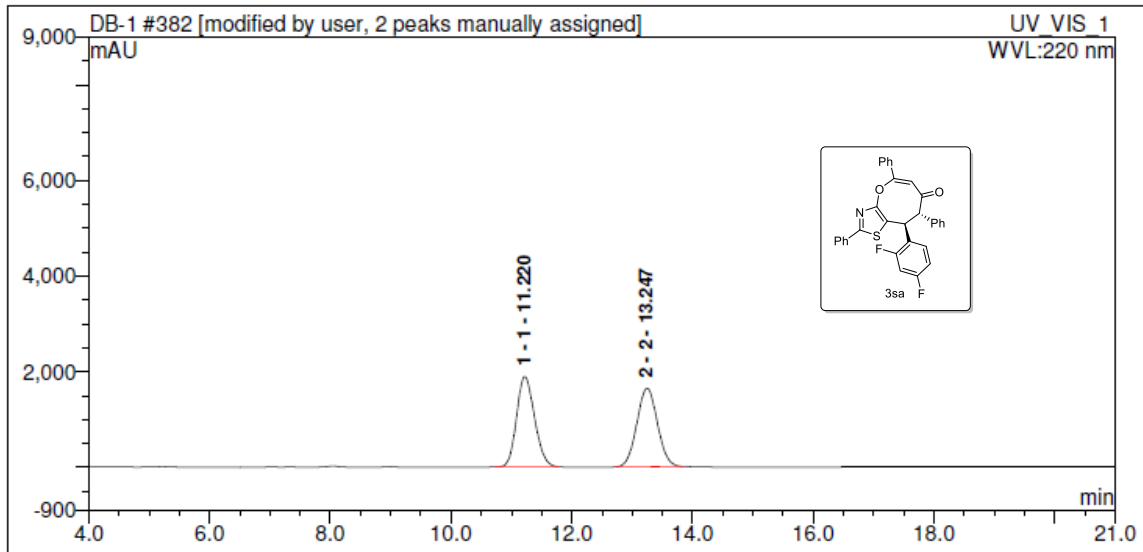

| No. | Peak Name | Ret.Time (detected)<br>min | Area<br>mAU*min | Rel.Area(ident.)<br>% | Height<br>mAU | Amount |
|-----|-----------|----------------------------|-----------------|-----------------------|---------------|--------|
| 1   | 1         | 11.22                      | 652.81          | 50.18759172           | 1889.689      | n.a.   |
| 2   | 2         | 13.24666667                | 647.9298        | 49.81240828           | 1640.508      | n.a.   |

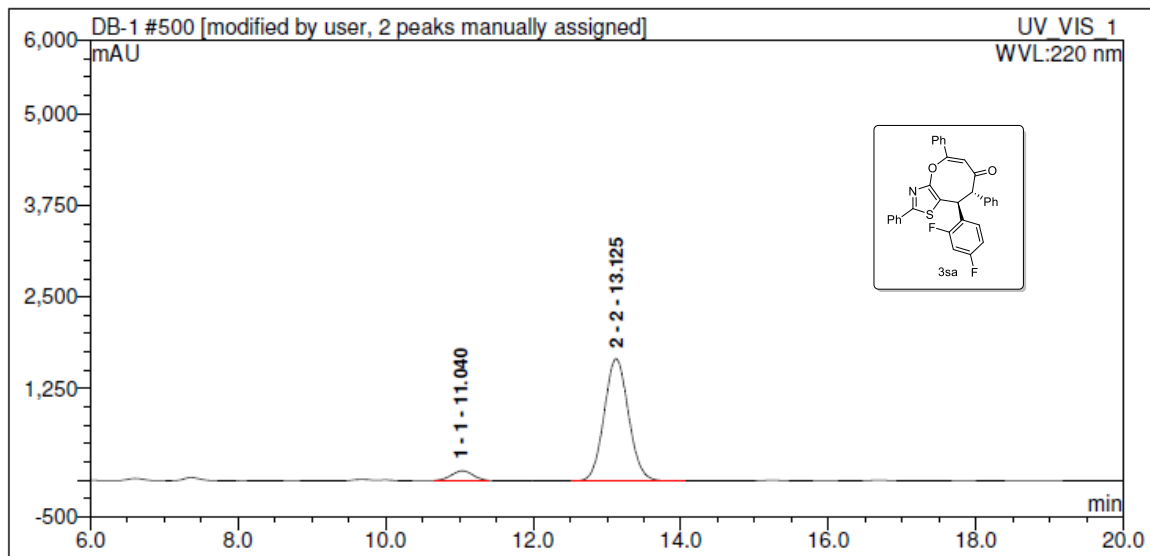

| No. | Peak Name | Ret.Time (detected)<br>min | Area<br>mAU*min | Rel.Area(ident.)<br>% | Height<br>mAU | Amount |
|-----|-----------|----------------------------|-----------------|-----------------------|---------------|--------|
| 1   | 1         | 11.04                      | 43.14039        | 6.350632938           | 130.152       | n.a.   |
| 2   | 2         | 13.125                     | 636.1681        | 93.64936706           | 1663.131      | n.a.   |

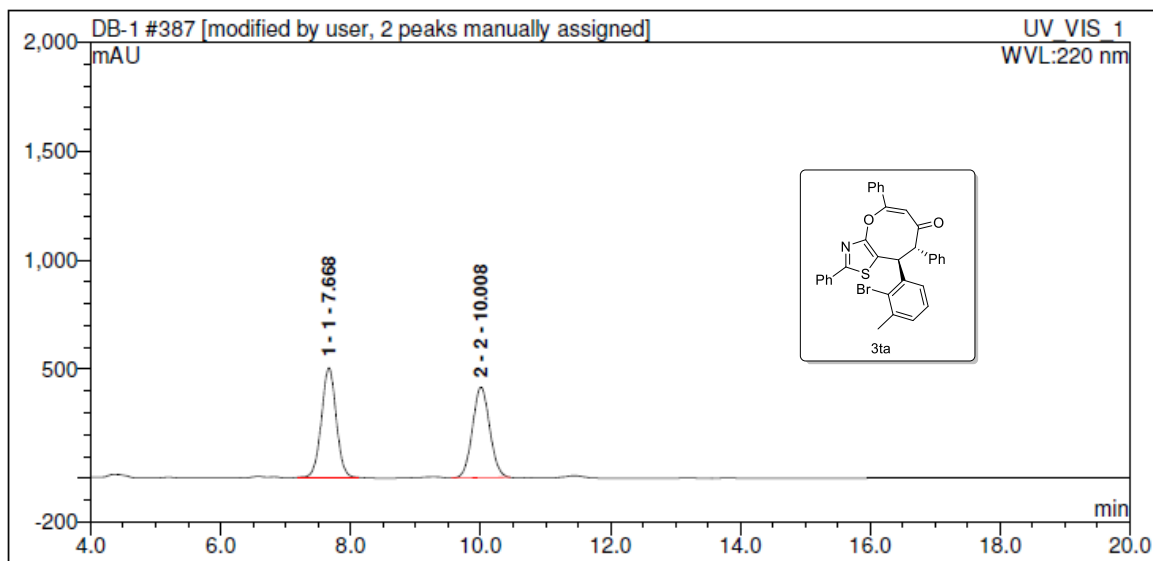

| No. | Peak Name | Ret.Time (detected)<br>min | Area<br>mAU*min | Rel.Area(ident.)<br>% | Height<br>mAU | Amount |
|-----|-----------|----------------------------|-----------------|-----------------------|---------------|--------|
| 1   | 1         | 7.66833333                 | 132.1241        | 50.86034908           | 501.8468      | n.a.   |
| 2   | 2         | 10.00833333                | 127.6541        | 49.13965092           | 414.4039      | n.a.   |

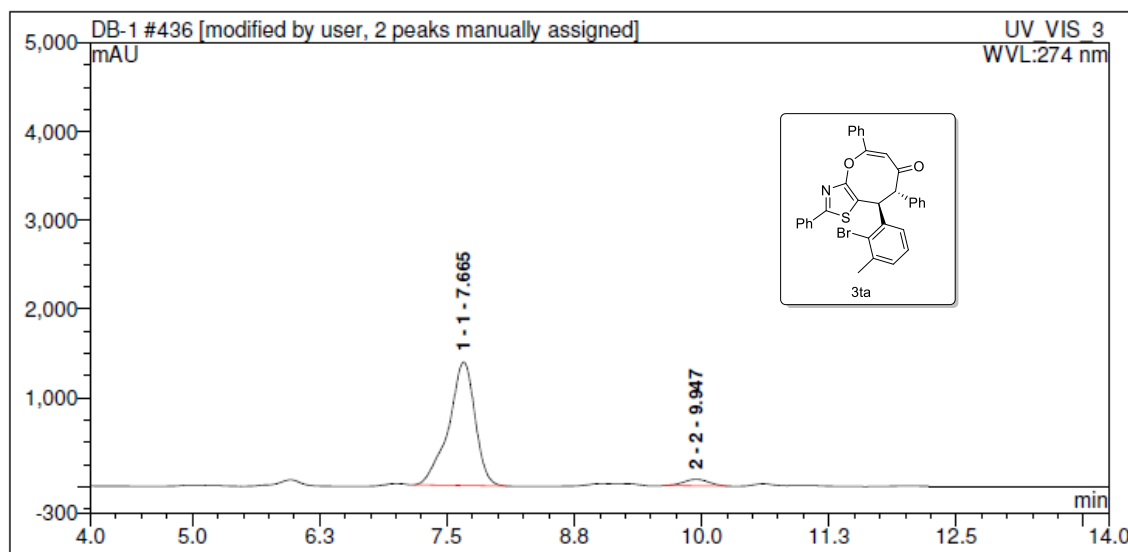

| No. | Peak Name | Ret.Time (detected)<br>min | Area<br>mAU*min | Rel.Area(ident.)<br>% | Height<br>mAU | Amount |
|-----|-----------|----------------------------|-----------------|-----------------------|---------------|--------|
| 1   | 1         | 7.665                      | 418.0618        | 95.30136427           | 1389.595      | n.a.   |
| 2   | 2         | 9.94666667                 | 20.61167        | 4.698635732           | 72.74986      | n.a.   |

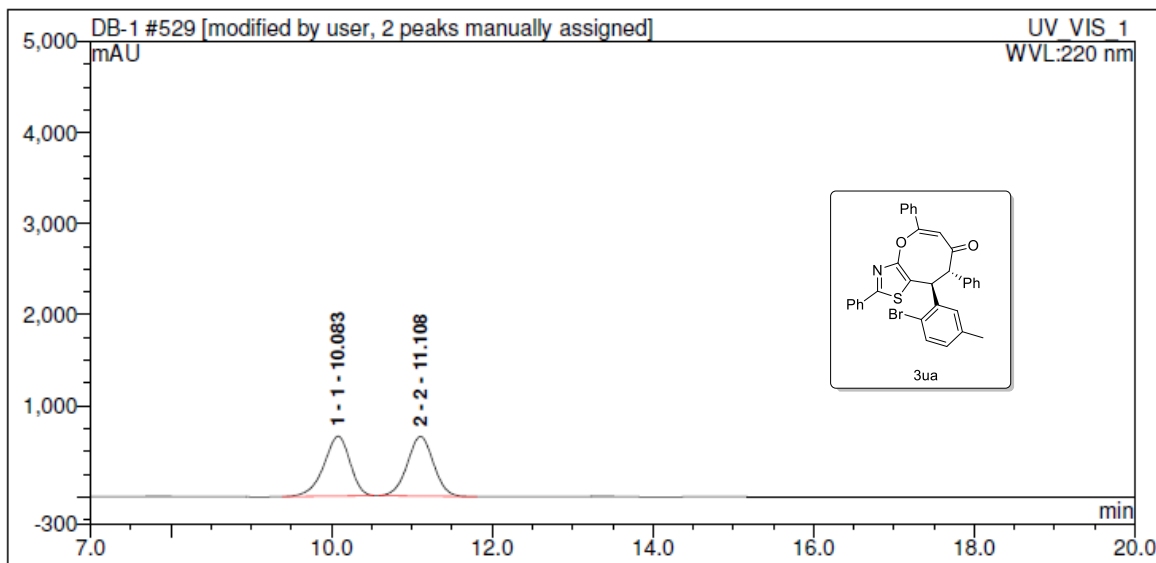

| No. | Peak Name | Ret.Time (detected)<br>min | Area<br>mAU*min | Rel.Area(ident.)<br>% | Height<br>mAU | Amount |
|-----|-----------|----------------------------|-----------------|-----------------------|---------------|--------|
| 1   | 1         | 10.08333333                | 248.6284        | 50.06300598           | 655.6447      | n.a.   |
| 2   | 2         | 11.10833333                | 248.0026        | 49.93699402           | 654.5556      | n.a.   |

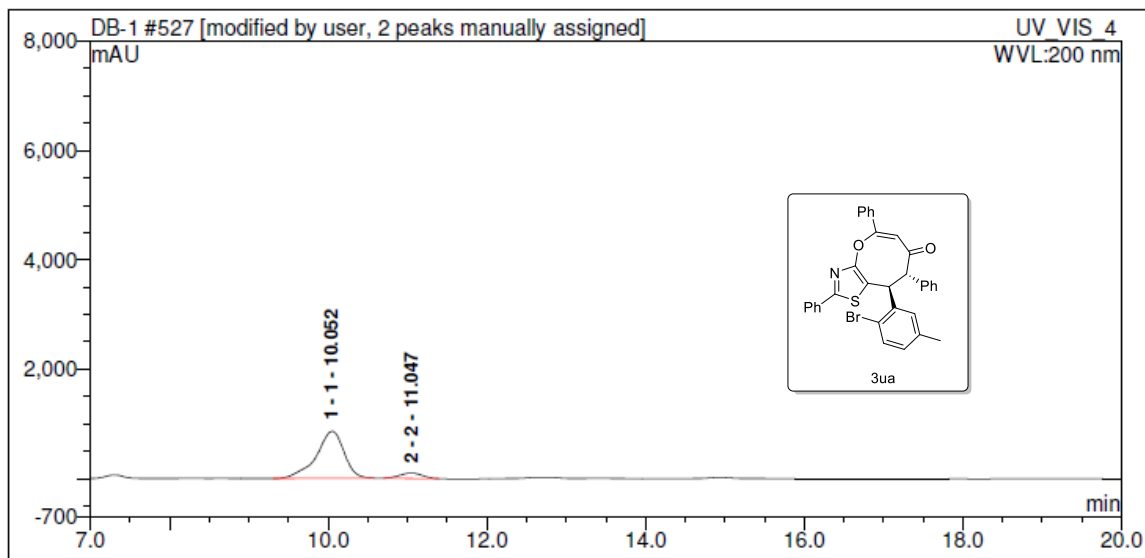

| No. | Peak Name | Ret.Time (detected)<br>min | Area<br>mAU*min | Rel.Area(ident.)<br>% | Height<br>mAU | Amount |
|-----|-----------|----------------------------|-----------------|-----------------------|---------------|--------|
| 1   | 1         | 10.05166667                | 349.9044        | 91.60412048           | 858.6424      | n.a.   |
| 2   | 2         | 11.04666667                | 32.07012        | 8.39587952            | 97.93444      | n.a.   |

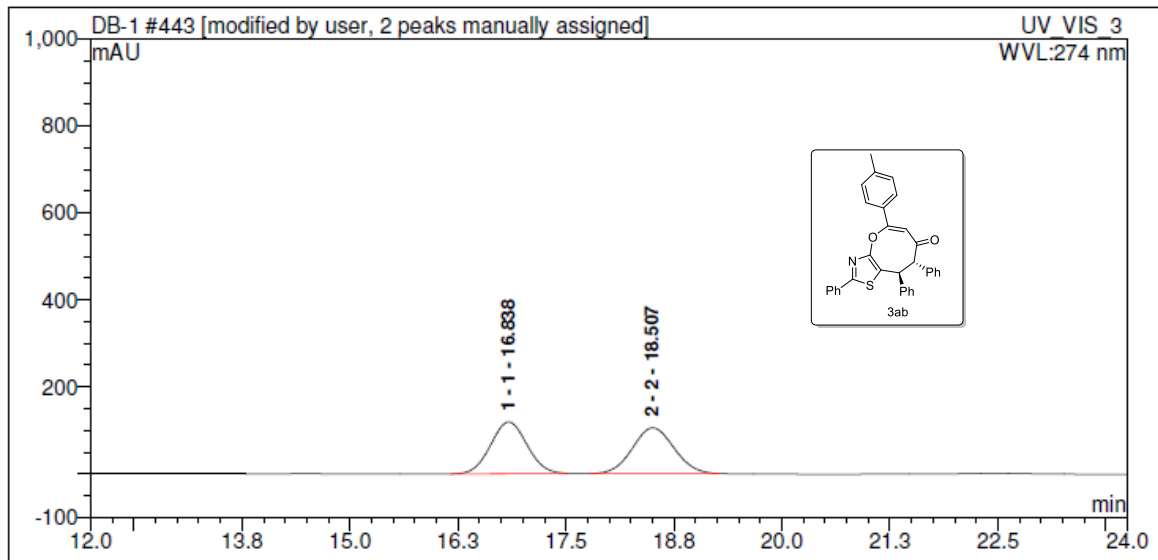

| No. | Peak Name | Ret.Time (detected)<br>min | Area<br>mAU*min | Rel.Area(ident.)<br>% | Height<br>mAU | Amount |
|-----|-----------|----------------------------|-----------------|-----------------------|---------------|--------|
| 1   | 1         | 16.83833333                | 58.10809        | 49.70212465           | 118.7087      | n.a.   |
| 2   | 2         | 18.50666667                | 58.8046         | 50.29787535           | 105.1063      | n.a.   |

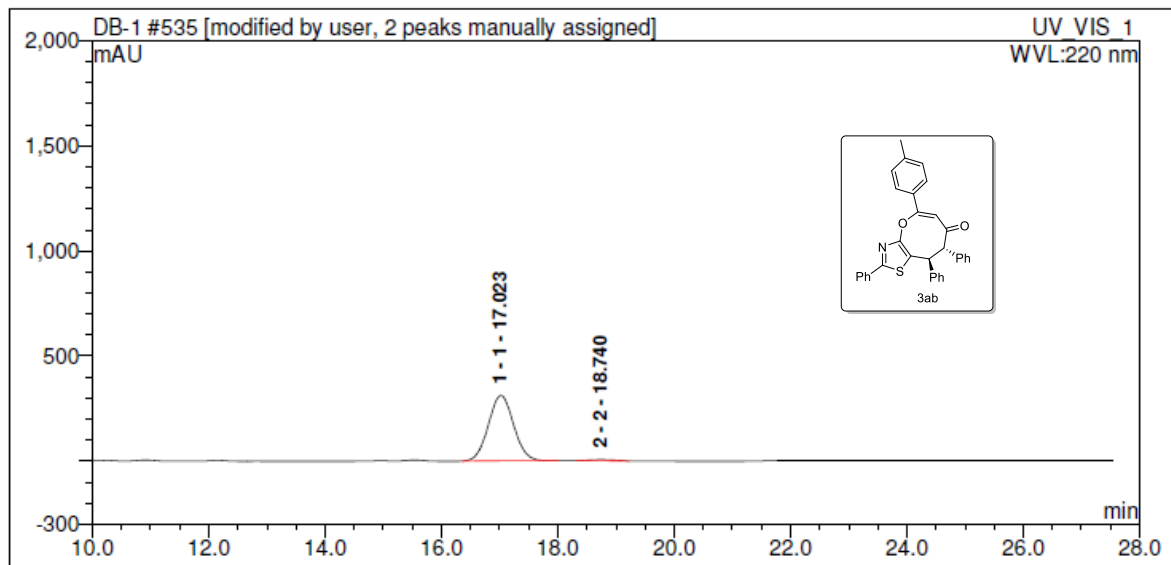

| No. | Peak Name | Ret.Time (detected)<br>min | Area<br>mAU*min | Rel.Area(ident.)<br>% | Height<br>mAU | Amount |
|-----|-----------|----------------------------|-----------------|-----------------------|---------------|--------|
| 1   | 1         | 17.02333333                | 156.4495        | 98.28512739           | 310.9712      | n.a.   |
| 2   | 2         | 18.74                      | 2.729721        | 1.714872612           | 5.78364       | n.a.   |

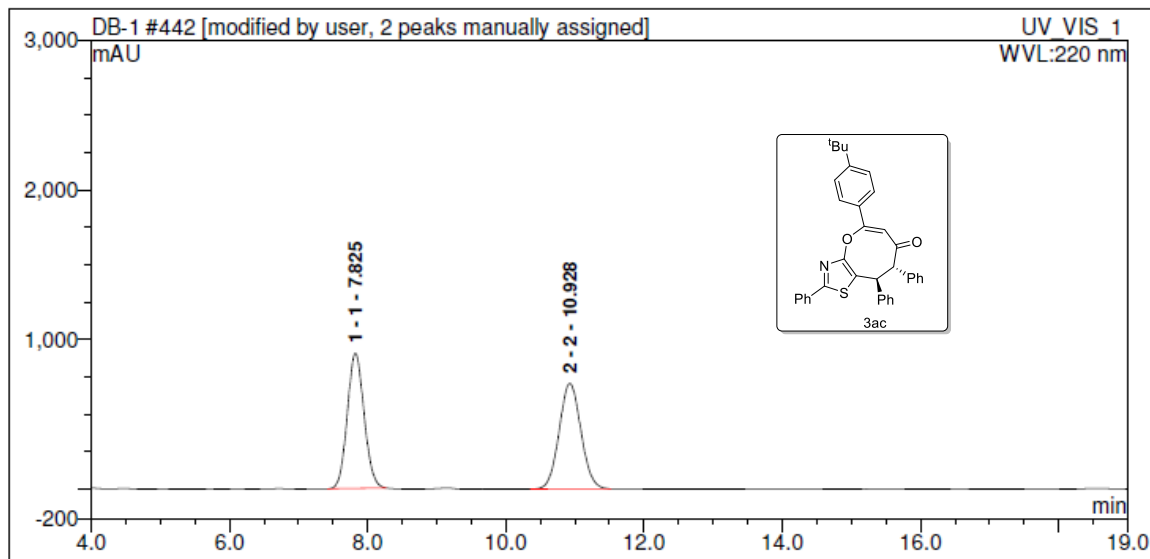

| No. | Peak Name | Ret.Time (detected)<br>min | Area<br>mAU*min | Rel.Area(ident.)<br>% | Height<br>mAU | Amount |
|-----|-----------|----------------------------|-----------------|-----------------------|---------------|--------|
| 1   | 1         | 7.825                      | 254.7838        | 49.74344084           | 901.7608      | n.a.   |
| 2   | 2         | 10.92833333                | 257.4119        | 50.25655916           | 705.1667      | n.a.   |

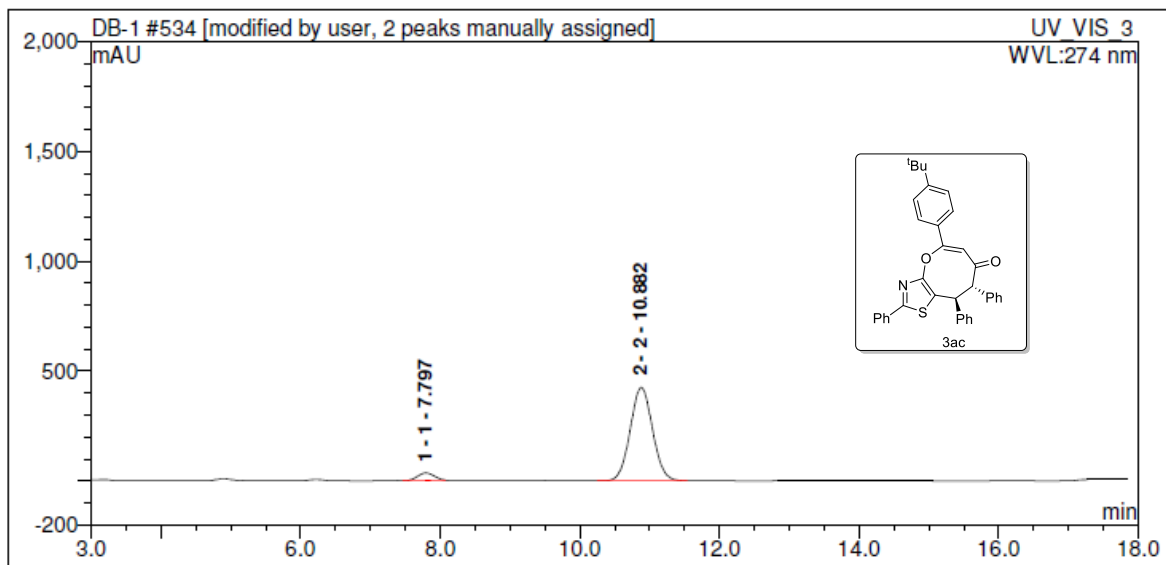

| No. | Peak Name | Ret.Time (detected)<br>min | Area<br>mAU*min | Rel.Area(ident.)<br>% | Height<br>mAU | Amount |
|-----|-----------|----------------------------|-----------------|-----------------------|---------------|--------|
| 1   | 1         | 7.796666667                | 9.342922        | 5.612635197           | 33.80197      | n.a.   |
| 2   | 2         | 10.88166667                | 157.1194        | 94.3873648            | 424.1762      | n.a.   |

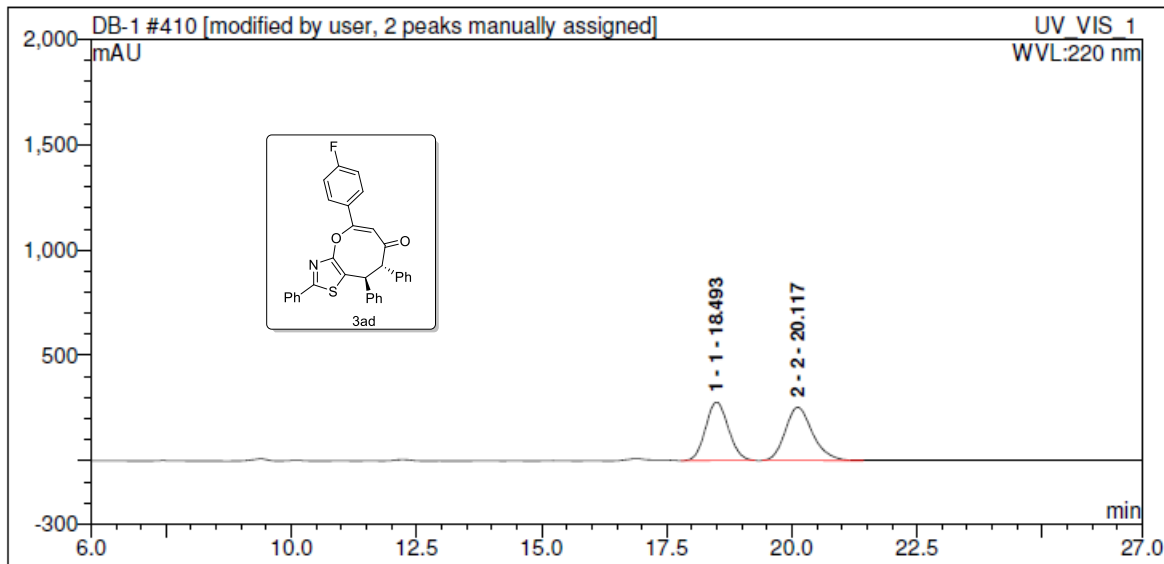

| No. | Peak Name | Ret.Time (detected)<br>min | Area<br>mAU*min | Rel.Area(ident.)<br>% | Height<br>mAU | Amount |
|-----|-----------|----------------------------|-----------------|-----------------------|---------------|--------|
| 1   | 1         | 18.49333333                | 145.827         | 47.68727675           | 276.607       | n.a.   |
| 2   | 2         | 20.11666667                | 159.9716        | 52.31272325           | 252.3927      | n.a.   |

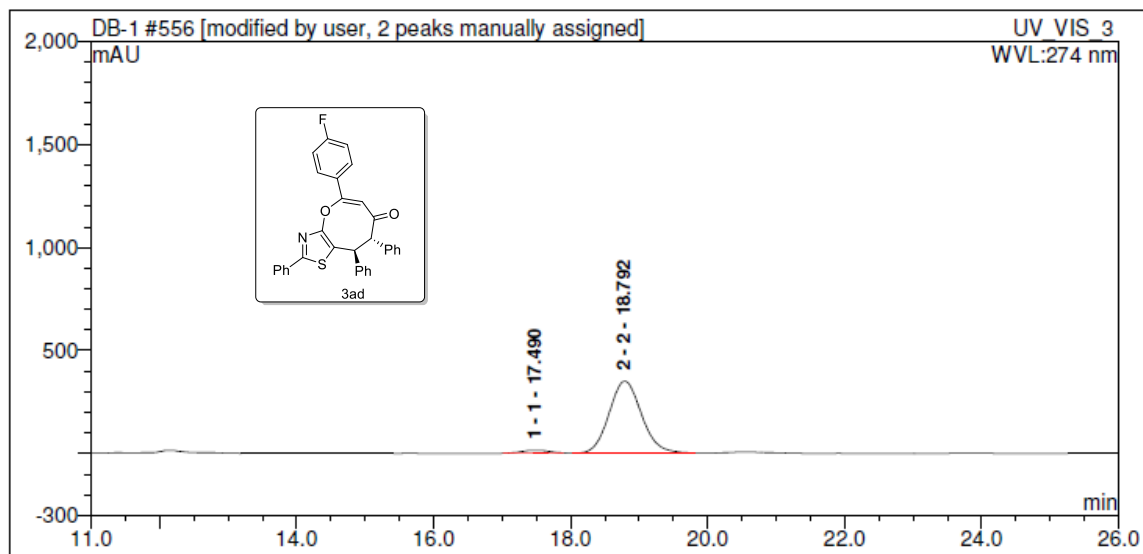

| No. | Peak Name | Ret.Time (detected)<br>min | Area<br>mAU*min | Rel.Area(ident.)<br>% | Height<br>mAU | Amount |
|-----|-----------|----------------------------|-----------------|-----------------------|---------------|--------|
| 1   | 1         | 17.49                      | 6.195135        | 3.12790199            | 14.11         | n.a.   |
| 2   | 2         | 18.79166667                | 191.8653        | 96.87209801           | 349.4529      | n.a.   |

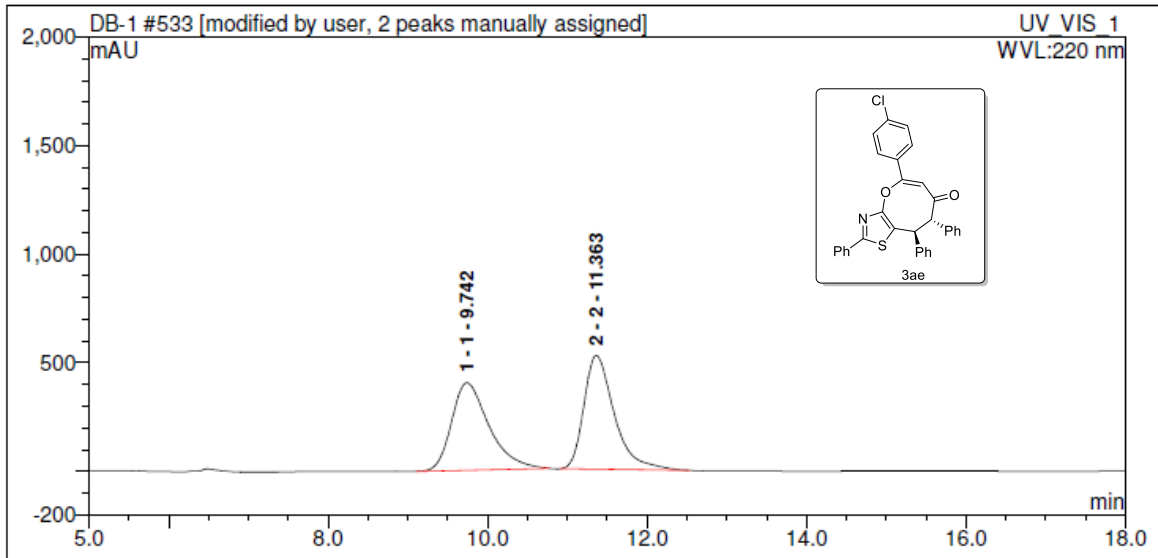

| No. | Peak Name | Ret.Time (detected)<br>min | Area<br>mAU*min | Rel.Area(ident.)<br>% | Height<br>mAU | Amount |
|-----|-----------|----------------------------|-----------------|-----------------------|---------------|--------|
| 1   | 1         | 9.74166667                 | 218.9211        | 48.60611899           | 402.2252      | n.a.   |
| 2   | 2         | 11.36333333                | 231.4771        | 51.39388101           | 522.6293      | n.a.   |

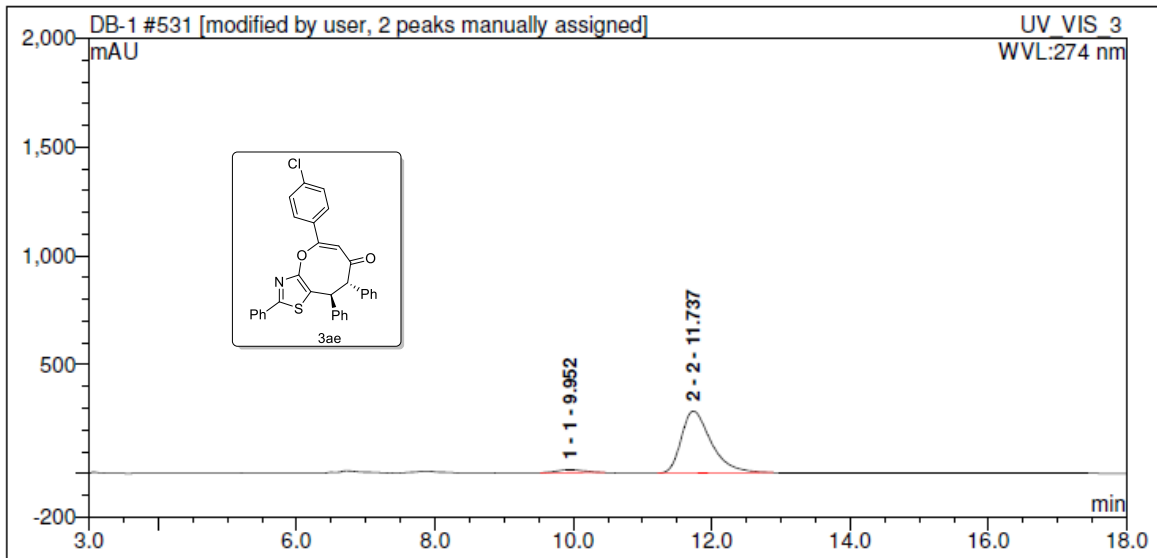

| No. | Peak Name | Ret.Time (detected)<br>min | Area<br>mAU*min | Rel.Area(ident.)<br>% | Height<br>mAU | Amount |
|-----|-----------|----------------------------|-----------------|-----------------------|---------------|--------|
| 1   | 1         | 9.95166667                 | 6.045262        | 4.074817467           | 12.84688      | n.a.   |
| 2   | 2         | 11.73666667                | 142.3114        | 95.92518253           | 284.4824      | n.a.   |

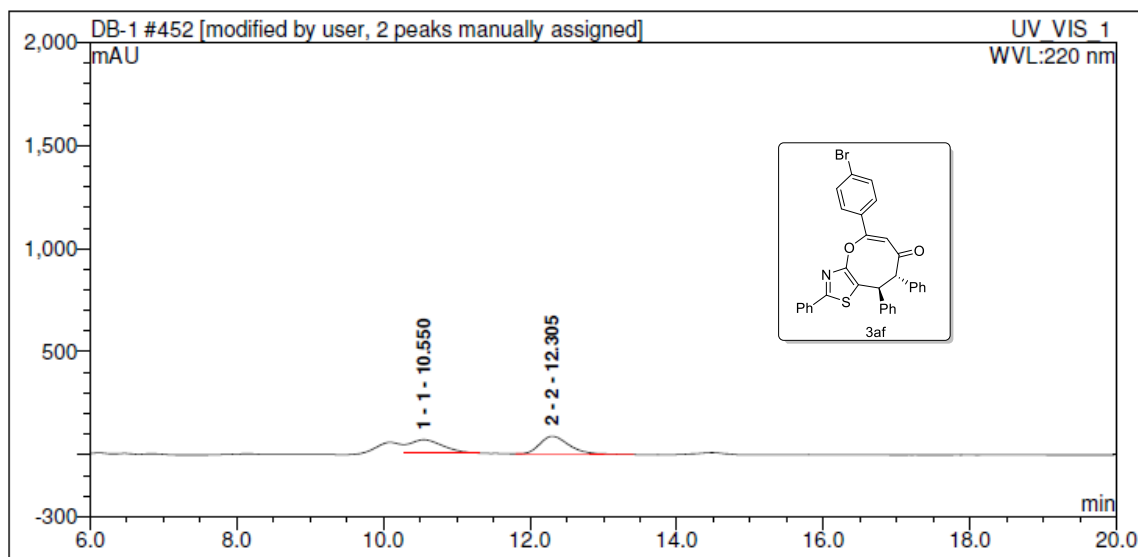

| No. | Peak Name | Ret.Time (detected)<br>min | Area<br>mAU*min | Rel.Area(ident.)<br>% | Height<br>mAU | Amount |
|-----|-----------|----------------------------|-----------------|-----------------------|---------------|--------|
| 1   | 1         | 10.55                      | 34.22569        | 46.14467915           | 64.69031      | n.a.   |
| 2   | 2         | 12.305                     | 39.9447         | 53.85532085           | 86.42644      | n.a.   |

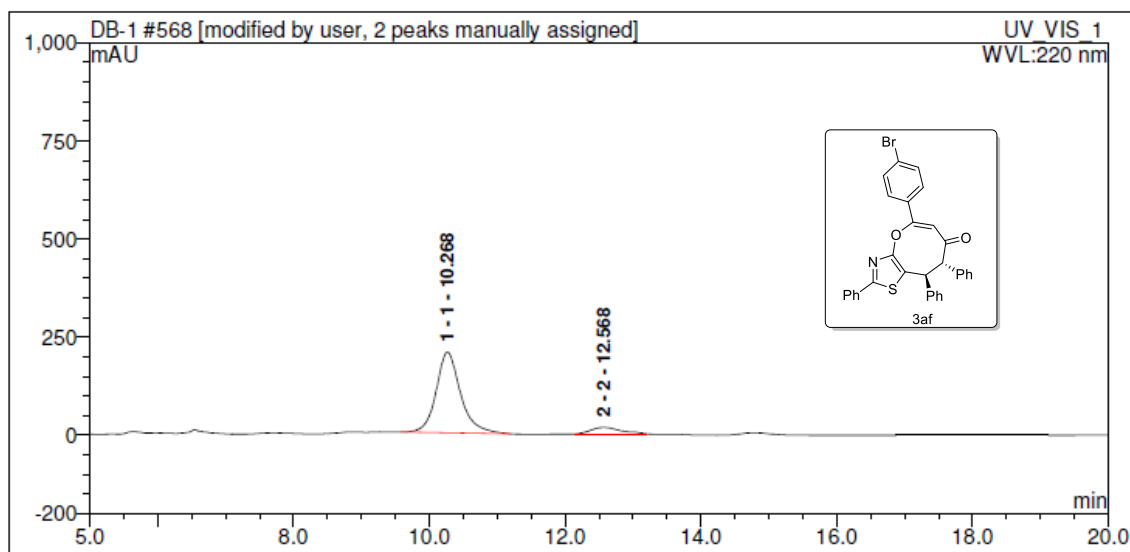

| No. | Peak Name | Ret.Time (detected)<br>min | Area<br>mAU*min | Rel.Area(ident.)<br>% | Height<br>mAU | Amount |
|-----|-----------|----------------------------|-----------------|-----------------------|---------------|--------|
| 1   | 1         | 10.26833333                | 85.53092        | 91.09965484           | 204.9526      | n.a.   |
| 2   | 2         | 12.56833333                | 8.356285        | 8.900345157           | 16.59323      | n.a.   |

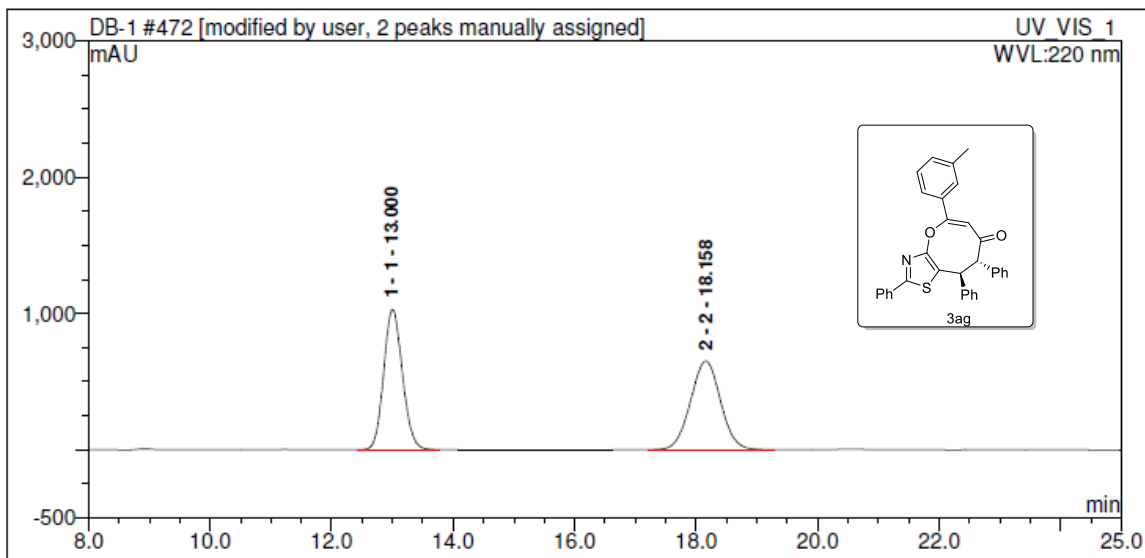

| No. | Peak Name | Ret.Time (detected)<br>min | Area<br>mAU*min | Rel.Area(ident.)<br>% | Height<br>mAU | Amount |
|-----|-----------|----------------------------|-----------------|-----------------------|---------------|--------|
| 1   | 1         | 13                         | 366.0605        | 49.66701547           | 1027.336      | n.a.   |
| 2   | 2         | 18.15833333                | 370.9689        | 50.33298453           | 648.5408      | n.a.   |

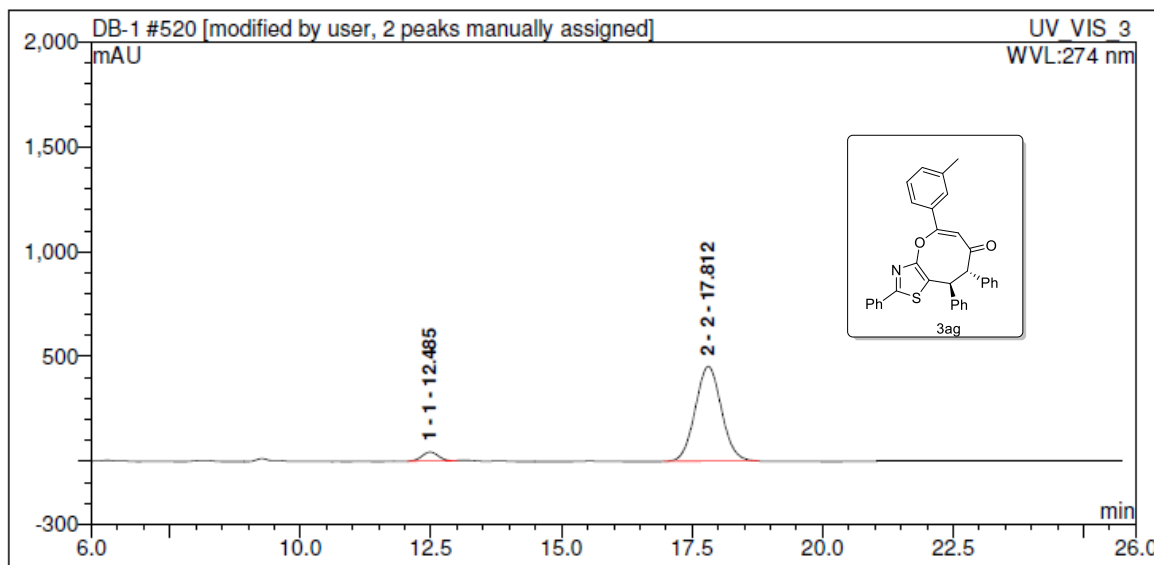

| No. | Peak Name | Ret.Time (detected)<br>min | Area<br>mAU*min | Rel.Area(ident.)<br>% | Height<br>mAU | Amount |
|-----|-----------|----------------------------|-----------------|-----------------------|---------------|--------|
| 1   | 1         | 12.485                     | 14.7045         | 5.300614165           | 41.96989      | n.a.   |
| 2   | 2         | 17.81166667                | 262.7068        | 94.69938584           | 451.1646      | n.a.   |

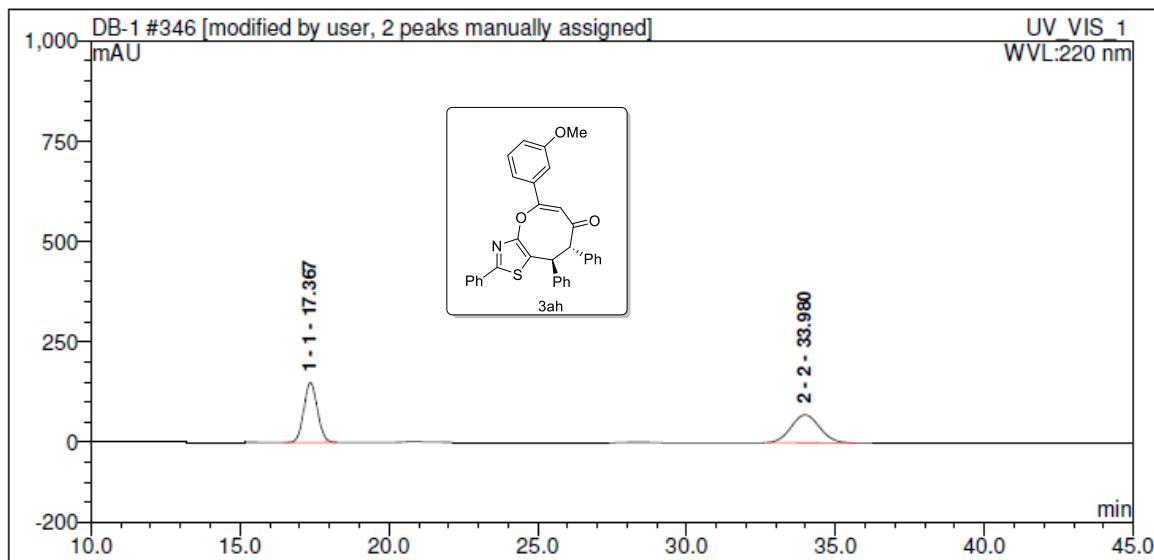

| No. | Peak Name | Ret.Time (detected)<br>min | Area<br>mAU*min | Rel.Area(ident.)<br>% | Height<br>mAU | Amount |
|-----|-----------|----------------------------|-----------------|-----------------------|---------------|--------|
| 1   | 1         | 17.3666667                 | 79.19154        | 50.75289151           | 148.8118      | n.a.   |
| 2   | 2         | 33.98                      | 76.84201        | 49.24710849           | 69.38648      | n.a.   |

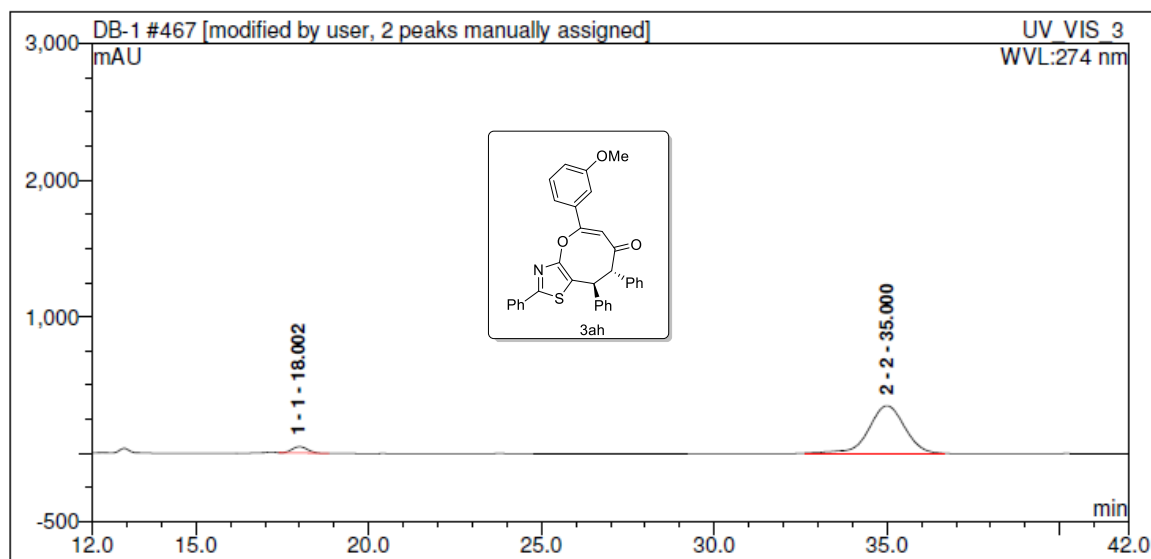

| No. | Peak Name | Ret.Time (detected)<br>min | Area<br>mAU*min | Rel.Area(ident.)<br>% | Height<br>mAU | Amount |
|-----|-----------|----------------------------|-----------------|-----------------------|---------------|--------|
| 1   | 1         | 18.00166667                | 23.94242        | 5.448494874           | 46.3381       | n.a.   |
| 2   | 2         | 35                         | 415.4894        | 94.55150513           | 347.3595      | n.a.   |

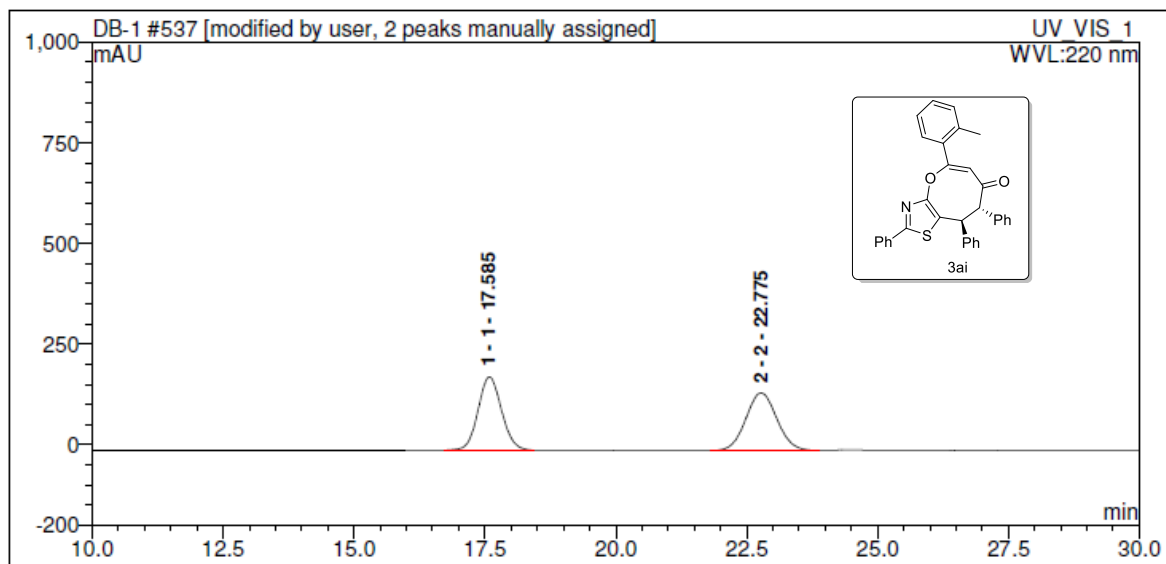

| No. | Peak Name | Ret.Time (detected)<br>min | Area<br>mAU*min | Rel.Area(ident.)<br>% | Height<br>mAU | Amount |
|-----|-----------|----------------------------|-----------------|-----------------------|---------------|--------|
| 1   | 1         | 17.585                     | 94.0614         | 49.13273371           | 181.6197      | n.a.   |
| 2   | 2         | 22.775                     | 97.38205        | 50.86726629           | 142.7095      | n.a.   |

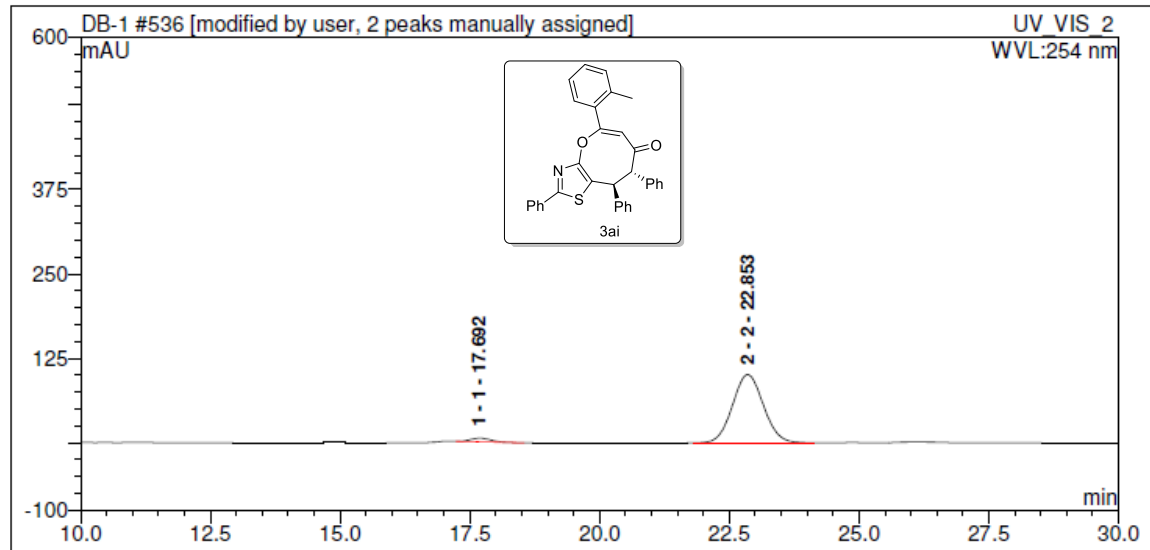

| No. | Peak Name | Ret.Time (detected)<br>min | Area<br>mAU*min | Rel.Area(ident.)<br>% | Height<br>mAU | Amount |
|-----|-----------|----------------------------|-----------------|-----------------------|---------------|--------|
| 1   | 1         | 17.69166667                | 2.323331        | 3.231409307           | 5.31393       | n.a.   |
| 2   | 2         | 22.85333333                | 69.57504        | 96.76859069           | 100.7969      | n.a.   |

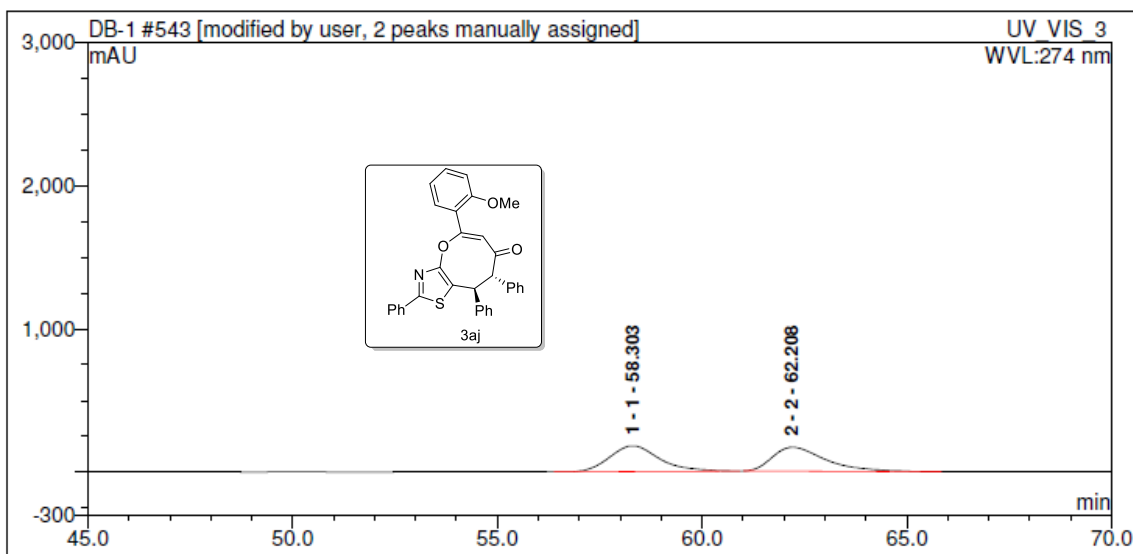

| No. | Peak Name | Ret.Time (detected)<br>min | Area<br>mAU*min | Rel.Area(ident.)<br>% | Height<br>mAU | Amount |
|-----|-----------|----------------------------|-----------------|-----------------------|---------------|--------|
| 1   | 1         | 58.30333333                | 255.4095        | 50.26147586           | 180.2512      | n.a.   |
| 2   | 2         | 62.20833333                | 252.7521        | 49.73852414           | 166.7045      | n.a.   |

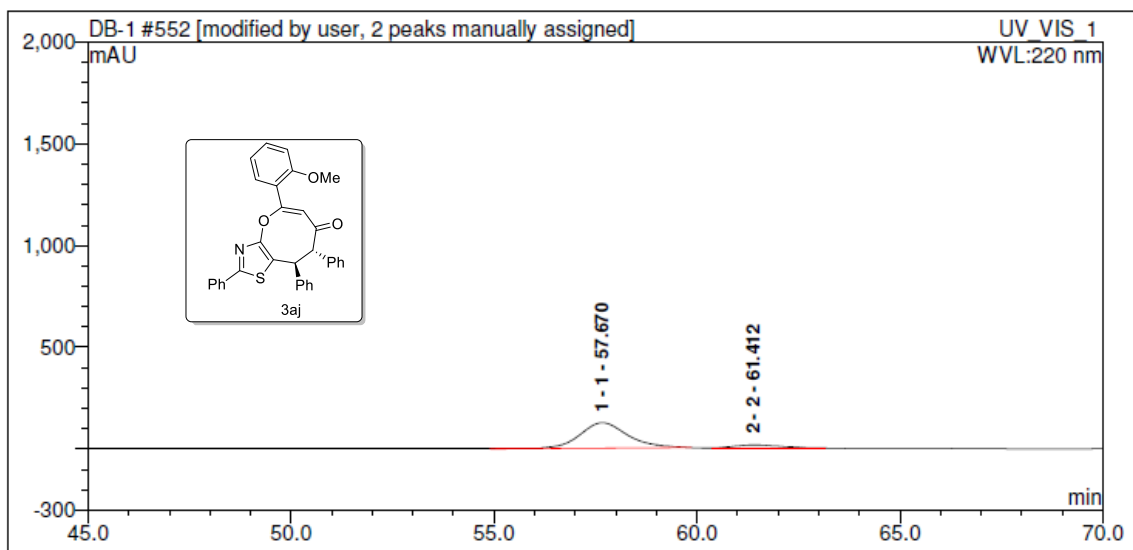

| No. | Peak Name | Ret.Time (detected)<br>min | Area<br>mAU*min | Rel.Area(ident.)<br>% | Height<br>mAU | Amount |
|-----|-----------|----------------------------|-----------------|-----------------------|---------------|--------|
| 1   | 1         | 57.67                      | 170.2319        | 89.579087             | 124.745       | n.a.   |
| 2   | 2         | 61.41166667                | 19.80341        | 10.420913             | 14.9738       | n.a.   |

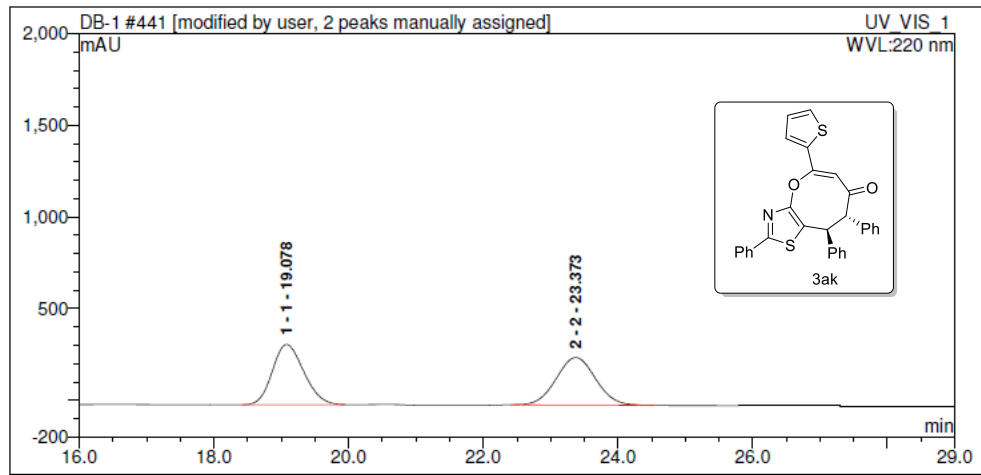

| No. | Peak Name | Ret.Time (detected)<br>min | Area<br>mAU*min | Rel.Area(ident.)<br>% | Height<br>mAU | Amount |
|-----|-----------|----------------------------|-----------------|-----------------------|---------------|--------|
| 1   | 1         | 19.07833333                | 177.5868        | 50.32462912           | 328.2913      | n.a.   |
| 2   | 2         | 23.37333333                | 175.2957        | 49.67537088           | 258.7539      | n.a.   |

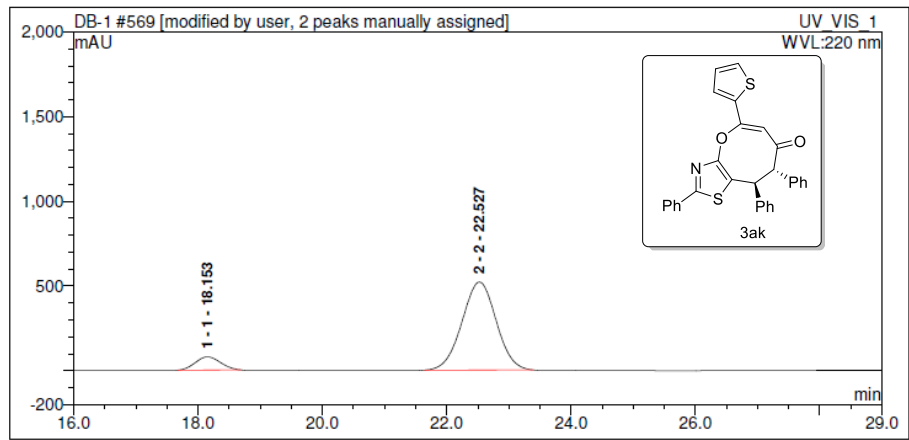

| No. | Peak Name | Ret.Time (detected)<br>min | Area<br>mAU*min | Rel.Area(ident.)<br>% | Height<br>mAU | Amount |
|-----|-----------|----------------------------|-----------------|-----------------------|---------------|--------|
| 1   | 1         | 18.15333333                | 36.40806        | 9.895067117           | 77.71987      | n.a.   |
| 2   | 2         | 22.52666667                | 331.5334        | 90.10493288           | 518.5578      | n.a.   |

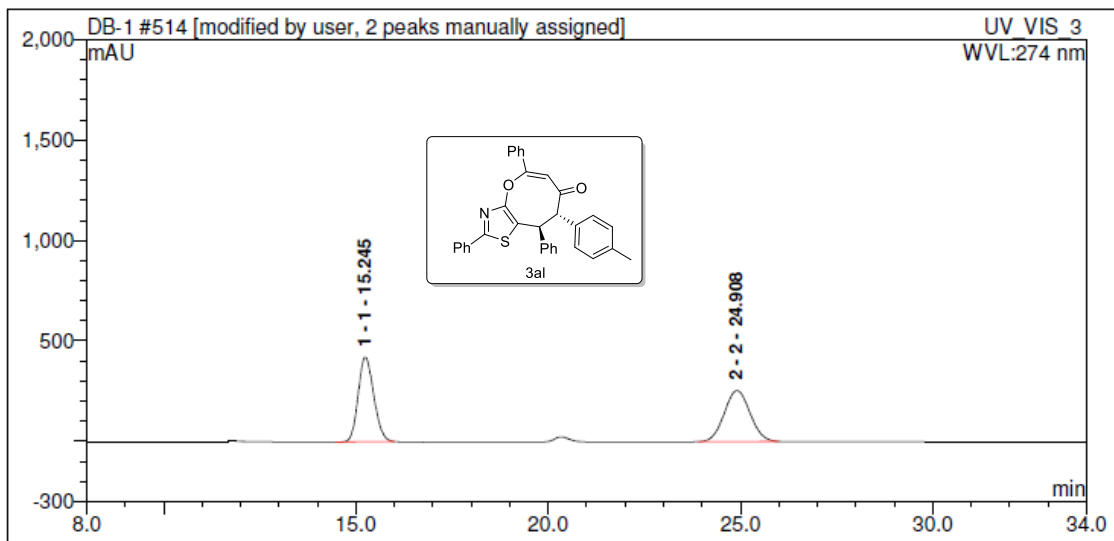

| No. | Peak Name | Ret. Time (detected) min | Area mAU*min | Rel. Area(ident.) % | Height mAU | Amount |
|-----|-----------|--------------------------|--------------|---------------------|------------|--------|
| 1   | 1         | 15.245                   | 197.5824     | 50.07210711         | 420.5449   | n.a.   |
| 2   | 2         | 24.90833333              | 197.0133     | 49.92789289         | 253.9416   | n.a.   |

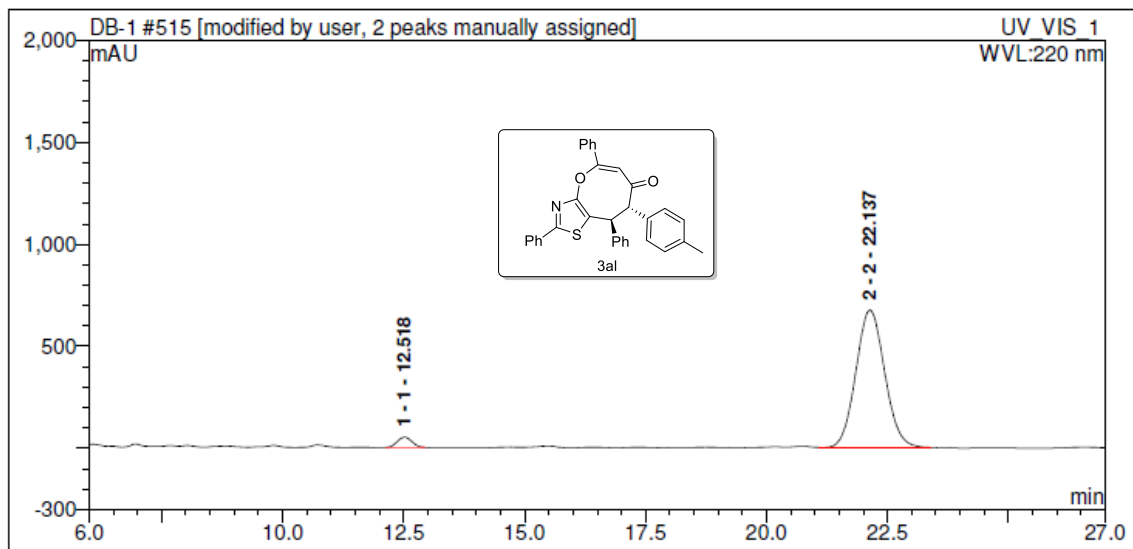

| No. | Peak Name | Ret. Time (detected) min | Area mAU*min | Rel. Area(ident.) % | Height mAU | Amount |
|-----|-----------|--------------------------|--------------|---------------------|------------|--------|
| 1   | 1         | 12.51833333              | 17.71098     | 3.663365958         | 50.47764   | n.a.   |
| 2   | 2         | 22.13666667              | 465.7509     | 96.33663404         | 673.5787   | n.a.   |

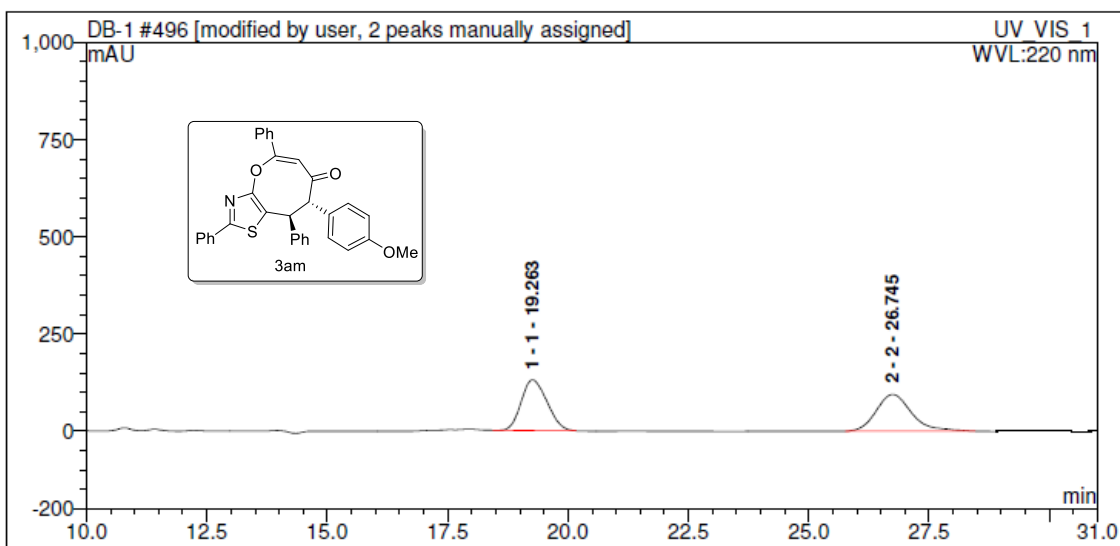

| No. | Peak Name | Ret.Time (detected)<br>min | Area<br>mAU*min | Rel.Area(ident.)<br>% | Height<br>mAU | Amount |
|-----|-----------|----------------------------|-----------------|-----------------------|---------------|--------|
| 1   | 1         | 19.26333333                | 80.97766        | 50.2618981            | 130.4308      | n.a.   |
| 2   | 2         | 26.745                     | 80.13377        | 49.7381019            | 94.32082      | n.a.   |

Operator:user Timebase:SCP\_HPLC-2 Sequence:DB-1

Page 1-2  
3/17/2026 11:48 AM

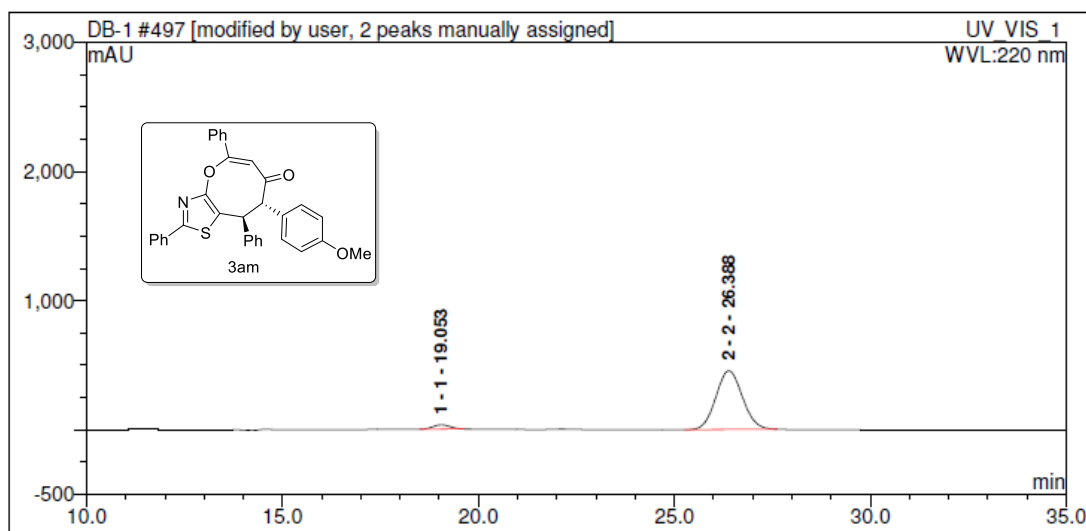

| No. | Peak Name | Ret.Time (detected)<br>min | Area<br>mAU*min | Rel.Area(ident.)<br>% | Height<br>mAU | Amount |
|-----|-----------|----------------------------|-----------------|-----------------------|---------------|--------|
| 1   | 1         | 19.05333333                | 17.15618        | 4.581007963           | 33.08403      | n.a.   |
| 2   | 2         | 26.38833333                | 357.3504        | 95.41899204           | 454.459       | n.a.   |

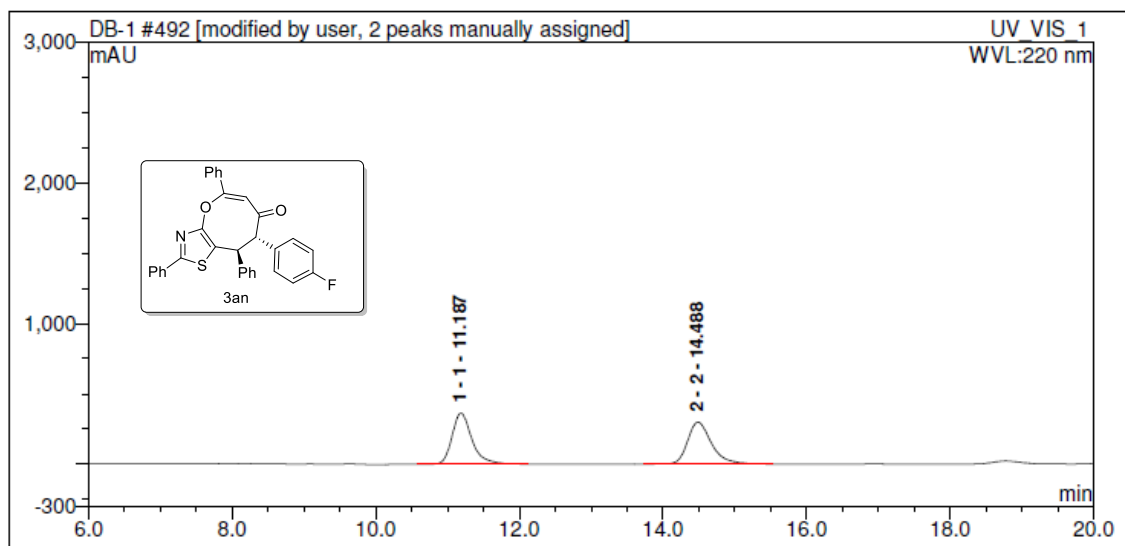

| No. | Peak Name | Ret.Time (detected) min | Area mAU*min | Rel.Area(ident.) % | Height mAU | Amount |
|-----|-----------|-------------------------|--------------|--------------------|------------|--------|
| 1   | 1         | 11.1866667              | 116.8537     | 50.05083296        | 363.2125   | n.a.   |
| 2   | 2         | 14.4883333              | 116.6163     | 49.94916704        | 299.2496   | n.a.   |

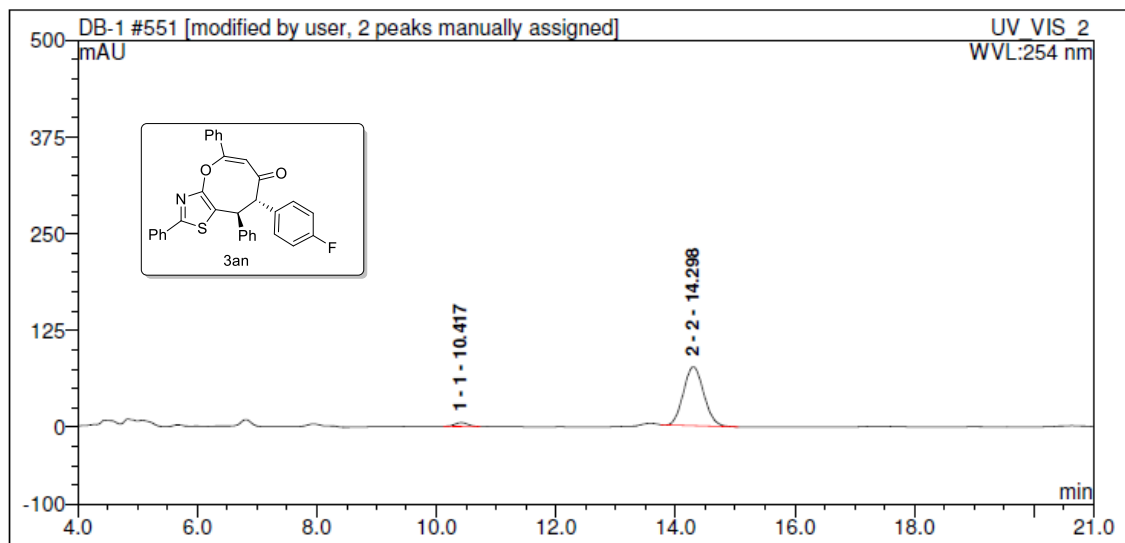

| No. | Peak Name | Ret.Time (detected) min | Area mAU*min | Rel.Area(ident.) % | Height mAU | Amount |
|-----|-----------|-------------------------|--------------|--------------------|------------|--------|
| 1   | 1         | 10.4166667              | 1.270806     | 4.061606843        | 5.10939    | n.a.   |
| 2   | 2         | 14.2983333              | 30.01745     | 95.93839316        | 76.16825   | n.a.   |

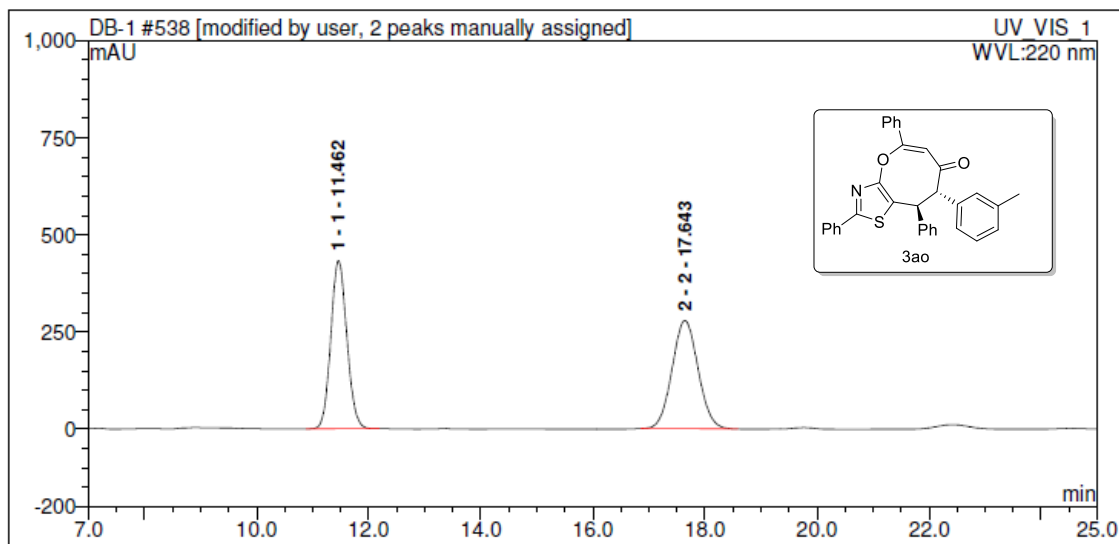

| No. | Peak Name | Ret.Time (detected)<br>min | Area<br>mAU*min | Rel.Area(ident.)<br>% | Height<br>mAU | Amount |
|-----|-----------|----------------------------|-----------------|-----------------------|---------------|--------|
| 1   | 1         | 11.46166667                | 143.5963        | 48.91117499           | 433.3686      | n.a.   |
| 2   | 2         | 17.64333333                | 149.9896        | 51.08882501           | 278.5612      | n.a.   |

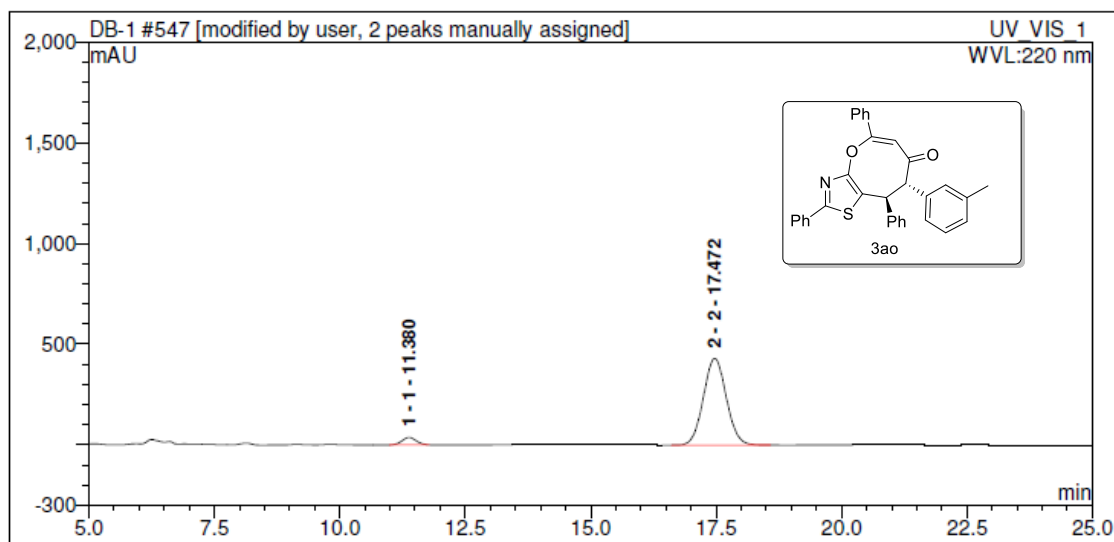

| No. | Peak Name | Ret.Time (detected)<br>min | Area<br>mAU*min | Rel.Area(ident.)<br>% | Height<br>mAU | Amount |
|-----|-----------|----------------------------|-----------------|-----------------------|---------------|--------|
| 1   | 1         | 11.38                      | 11.77564        | 4.910684766           | 36.77394      | n.a.   |
| 2   | 2         | 17.47166667                | 228.0207        | 95.08931523           | 430.3469      | n.a.   |

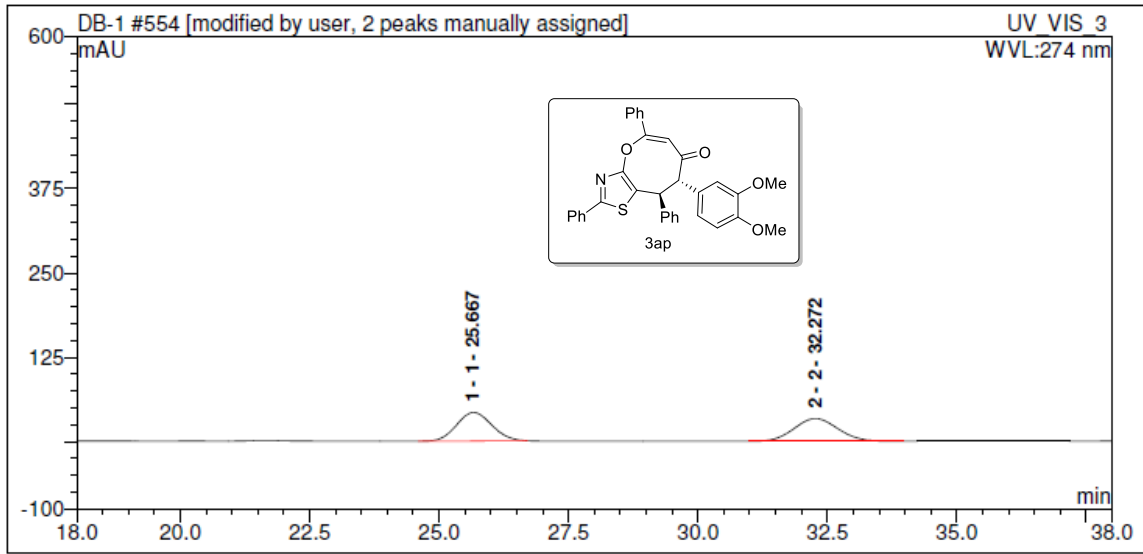

| No. | Peak Name | Ret.Time (detected)<br>min | Area<br>mAU*min | Rel.Area(ident.)<br>% | Height<br>mAU | Amount |
|-----|-----------|----------------------------|-----------------|-----------------------|---------------|--------|
| 1   | 1         | 25.6666667                 | 33.31768        | 49.88624566           | 42.2464       | n.a.   |
| 2   | 2         | 32.2716667                 | 33.46963        | 50.11375434           | 33.73113      | n.a.   |

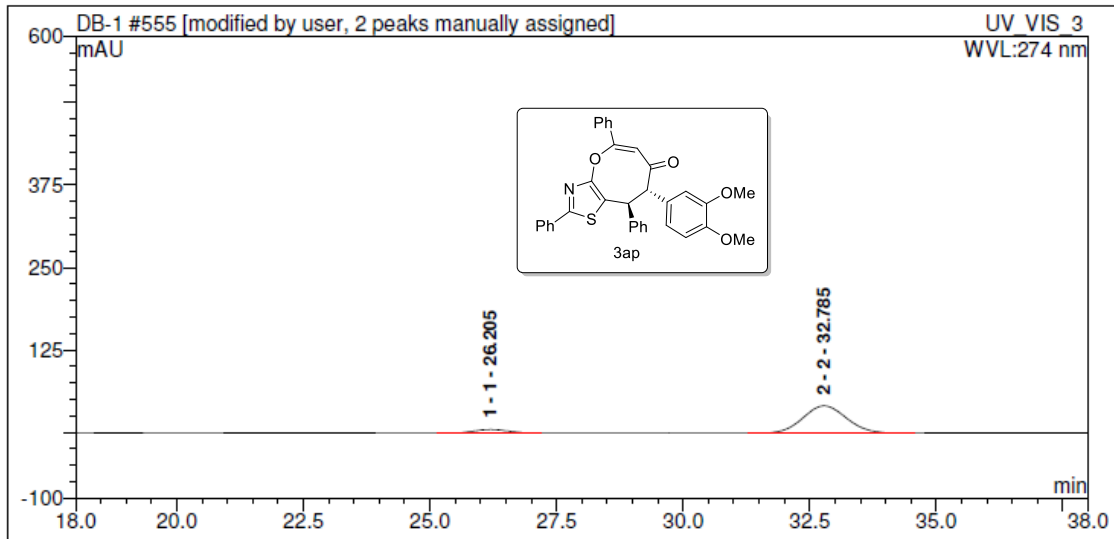

| No. | Peak Name | Ret.Time (detected)<br>min | Area<br>mAU*min | Rel.Area(ident.)<br>% | Height<br>mAU | Amount |
|-----|-----------|----------------------------|-----------------|-----------------------|---------------|--------|
| 1   | 1         | 26.205                     | 4.491429        | 9.70325739            | 5.70419       | n.a.   |
| 2   | 2         | 32.785                     | 41.79641        | 90.29674261           | 41.43716      | n.a.   |

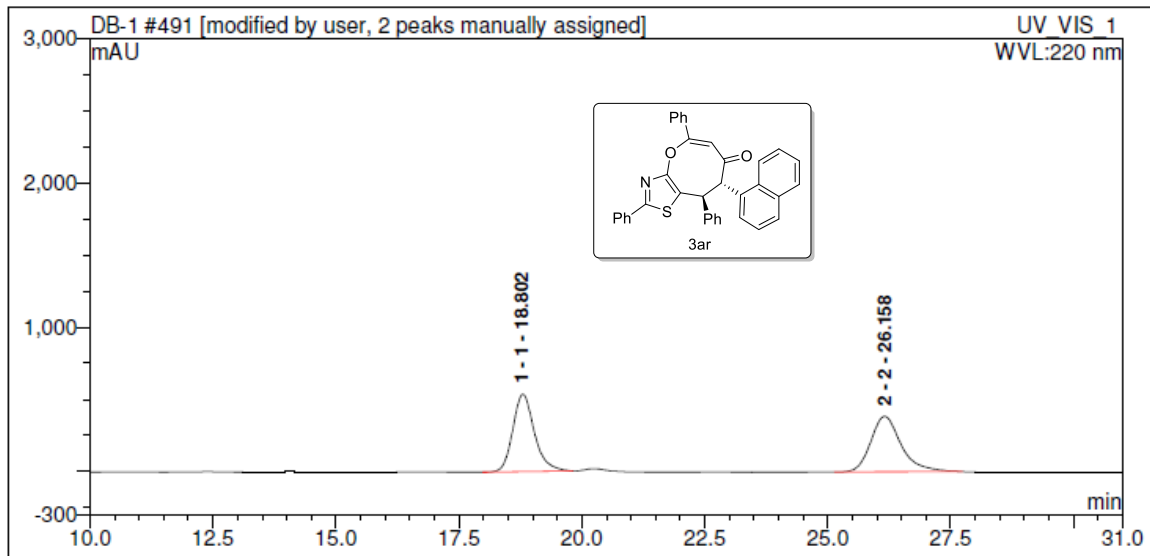

| No. | Peak Name | Ret.Time (detected)<br>min | Area<br>mAU*min | Rel.Area(ident.)<br>% | Height<br>mAU | Amount |
|-----|-----------|----------------------------|-----------------|-----------------------|---------------|--------|
| 1   | 1         | 18.80166667                | 272.3092        | 49.71366864           | 535.04        | n.a.   |
| 2   | 2         | 26.15833333                | 275.446         | 50.28633136           | 383.999       | n.a.   |

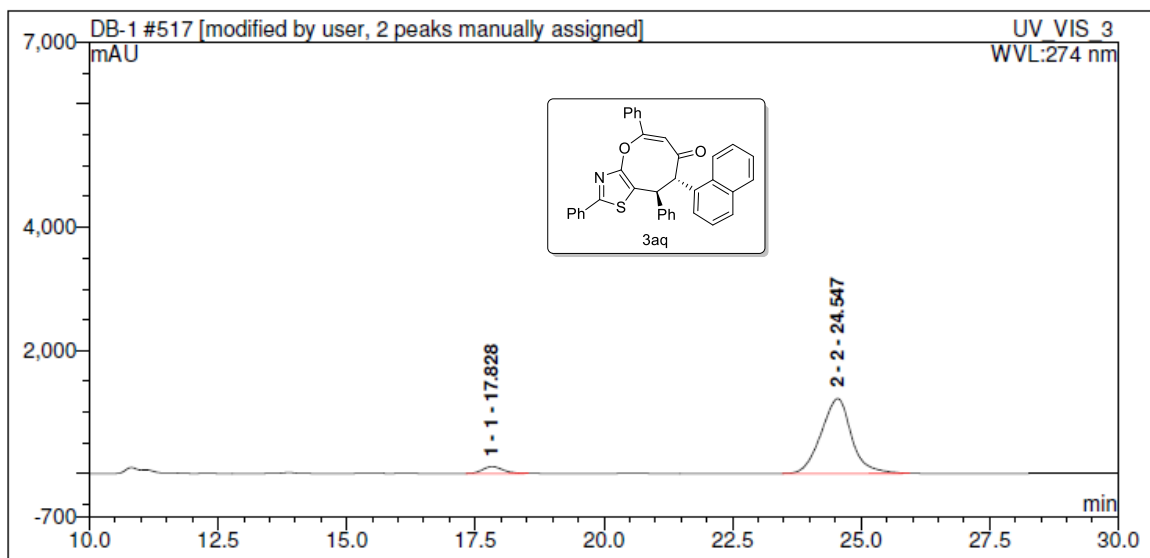

| No. | Peak Name | Ret.Time (detected)<br>min | Area<br>mAU*min | Rel.Area(ident.)<br>% | Height<br>mAU | Amount |
|-----|-----------|----------------------------|-----------------|-----------------------|---------------|--------|
| 1   | 1         | 17.82833333                | 51.49857        | 5.817053922           | 112.5725      | n.a.   |
| 2   | 2         | 24.54666667                | 833.8047        | 94.18294608           | 1214.137      | n.a.   |

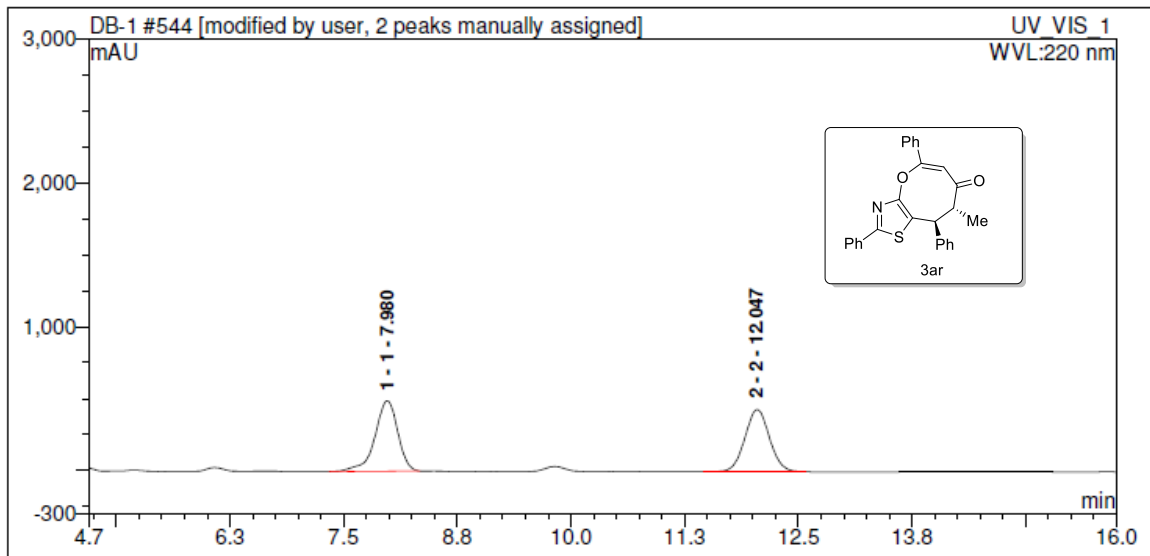

| No. | Peak Name | Ret.Time (detected)<br>min | Area<br>mAU*min | Rel.Area(ident.)<br>% | Height<br>mAU | Amount |
|-----|-----------|----------------------------|-----------------|-----------------------|---------------|--------|
| 1 1 |           | 7.98                       | 142.8601        | 51.17346573           | 489.6427      | n.a.   |
| 2 2 |           | 12.04666667                | 136.3082        | 48.82653427           | 432.7163      | n.a.   |

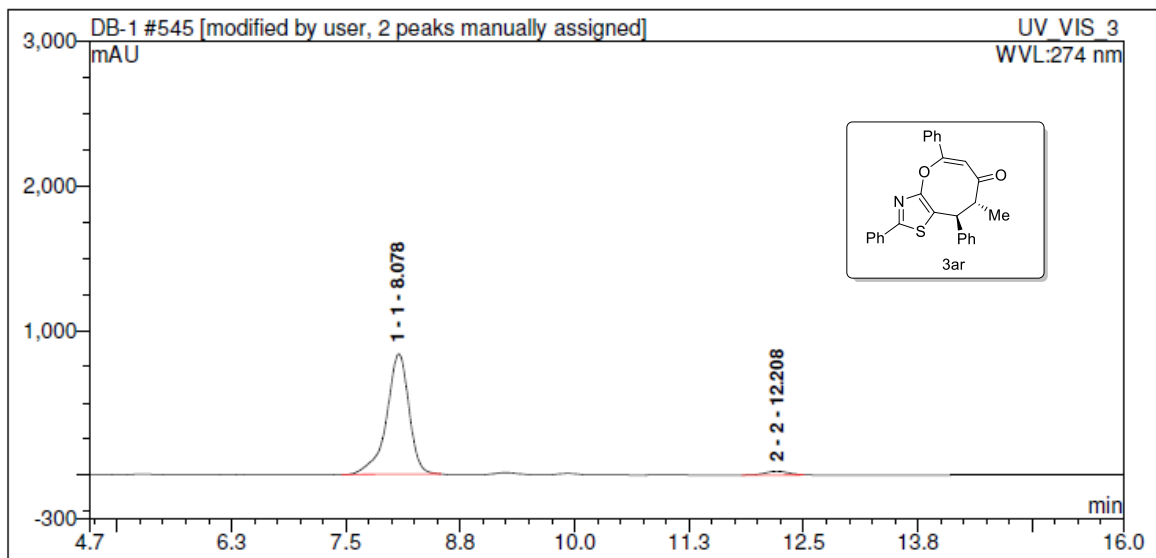

| No. | Peak Name | Ret.Time (detected)<br>min | Area<br>mAU*min | Rel.Area(ident.)<br>% | Height<br>mAU | Amount |
|-----|-----------|----------------------------|-----------------|-----------------------|---------------|--------|
| 1 1 |           | 8.078333333                | 236.6847        | 96.94813326           | 830.6967      | n.a.   |
| 2 2 |           | 12.20833333                | 7.450686        | 3.051866742           | 25.21936      | n.a.   |

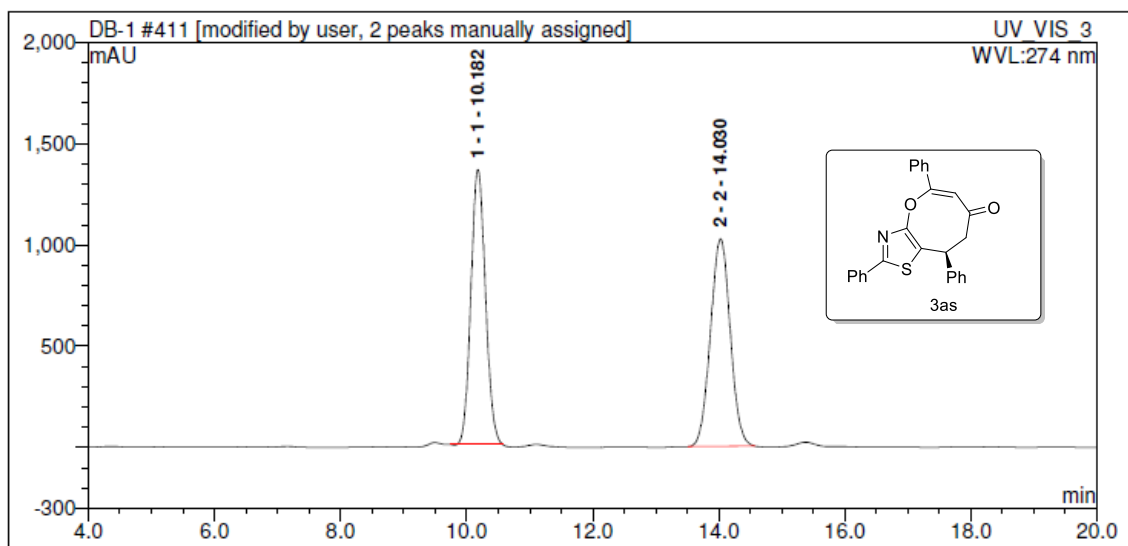

| No. | Peak Name | Ret.Time (detected)<br>min | Area<br>mAU*min | Rel.Area(ident.)<br>% | Height<br>mAU | Amount |
|-----|-----------|----------------------------|-----------------|-----------------------|---------------|--------|
| 1   | 1         | 10.18166667                | 363.7767        | 49.3555388            | 1357.722      | n.a.   |
| 2   | 2         | 14.03                      | 373.2765        | 50.64444612           | 1025.884      | n.a.   |

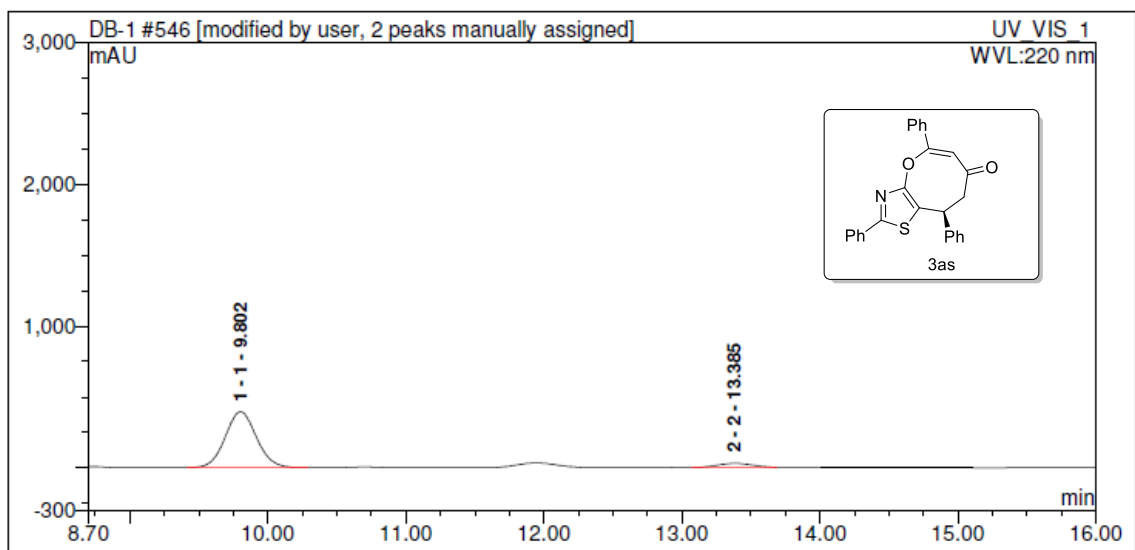

| No. | Peak Name | Ret.Time (detected)<br>min | Area<br>mAU*min | Rel.Area(ident.)<br>% | Height<br>mAU | Amount |
|-----|-----------|----------------------------|-----------------|-----------------------|---------------|--------|
| 1   | 1         | 9.801666667                | 103.2075        | 92.32162371           | 393.2049      | n.a.   |
| 2   | 2         | 13.385                     | 8.583752        | 7.67837629            | 28.62494      | n.a.   |

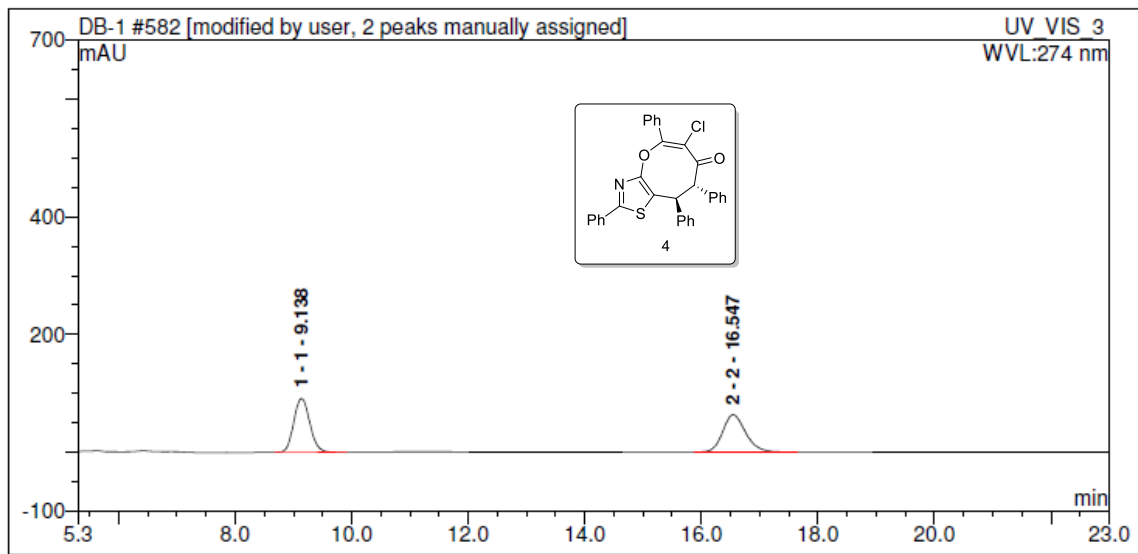

| No. | Peak Name | Ret.Time (detected)<br>min | Area<br>mAU*min | Rel.Area(ident.)<br>% | Height<br>mAU | Amount |
|-----|-----------|----------------------------|-----------------|-----------------------|---------------|--------|
| 1   | 1         | 9.138333333                | 28.92474        | 49.62130837           | 91.10418      | n.a.   |
| 2   | 2         | 16.54666667                | 29.36623        | 50.37869163           | 63.6697       | n.a.   |

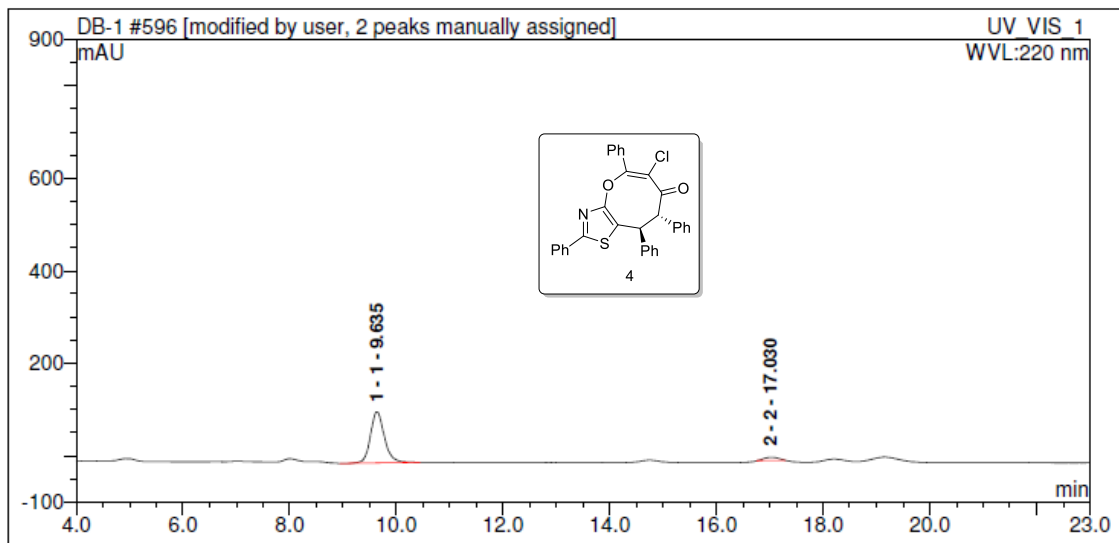

| No. | Peak Name | Ret.Time (detected)<br>min | Area<br>mAU*min | Rel.Area(ident.)<br>% | Height<br>mAU | Amount |
|-----|-----------|----------------------------|-----------------|-----------------------|---------------|--------|
| 1   | 1         | 9.635                      | 33.41325        | 93.60184996           | 110.3137      | n.a.   |
| 2   | 2         | 17.03                      | 2.283961        | 6.398150035           | 7.20052       | n.a.   |

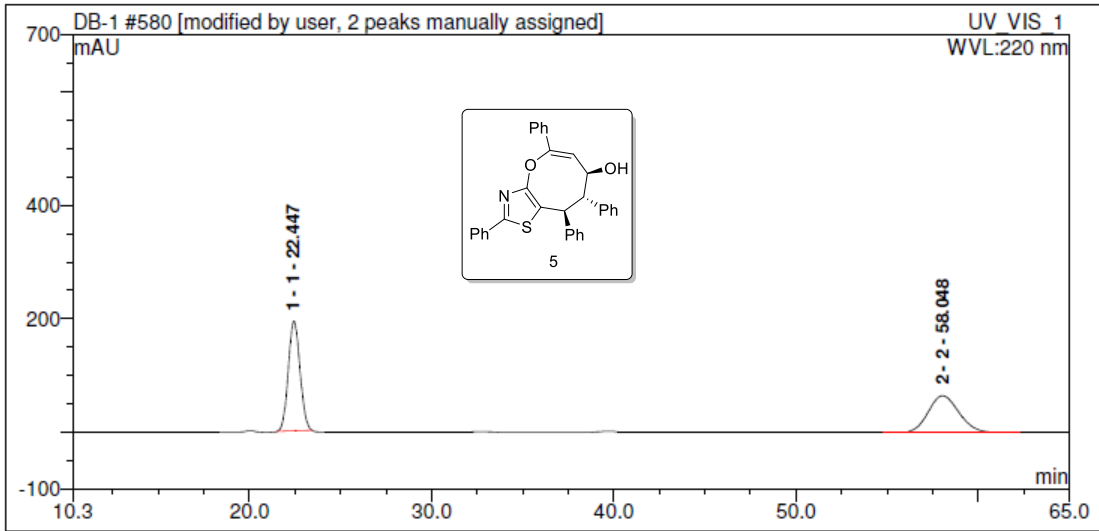

| No. | Peak Name | Ret.Time (detected)<br>min | Area<br>mAU*min | Rel.Area(ident.)<br>% | Height<br>mAU | Amount |
|-----|-----------|----------------------------|-----------------|-----------------------|---------------|--------|
| 1   | 1         | 22.4466667                 | 144.1098        | 53.28329814           | 193.2535      | n.a.   |
| 2   | 2         | 58.0483333                 | 126.3498        | 46.71670186           | 64.58702      | n.a.   |

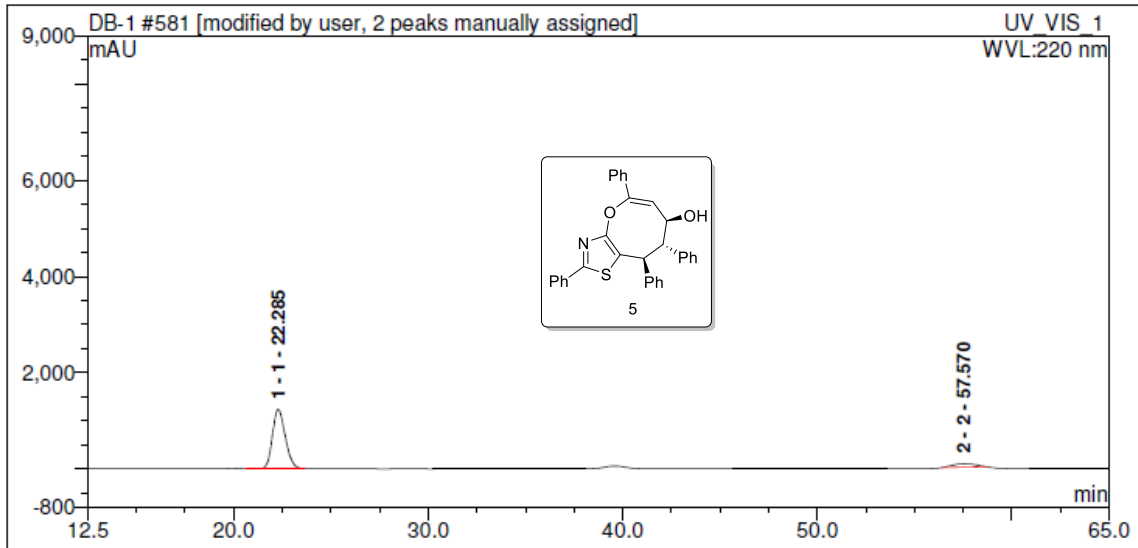

| No. | Peak Name | Ret.Time (detected)<br>min | Area<br>mAU*min | Rel.Area(ident.)<br>% | Height<br>mAU | Amount |
|-----|-----------|----------------------------|-----------------|-----------------------|---------------|--------|
| 1   | 1         | 22.285                     | 943.8172        | 90.63131974           | 1231.649      | n.a.   |
| 2   | 2         | 57.57                      | 97.56365        | 9.368680261           | 71.79842      | n.a.   |

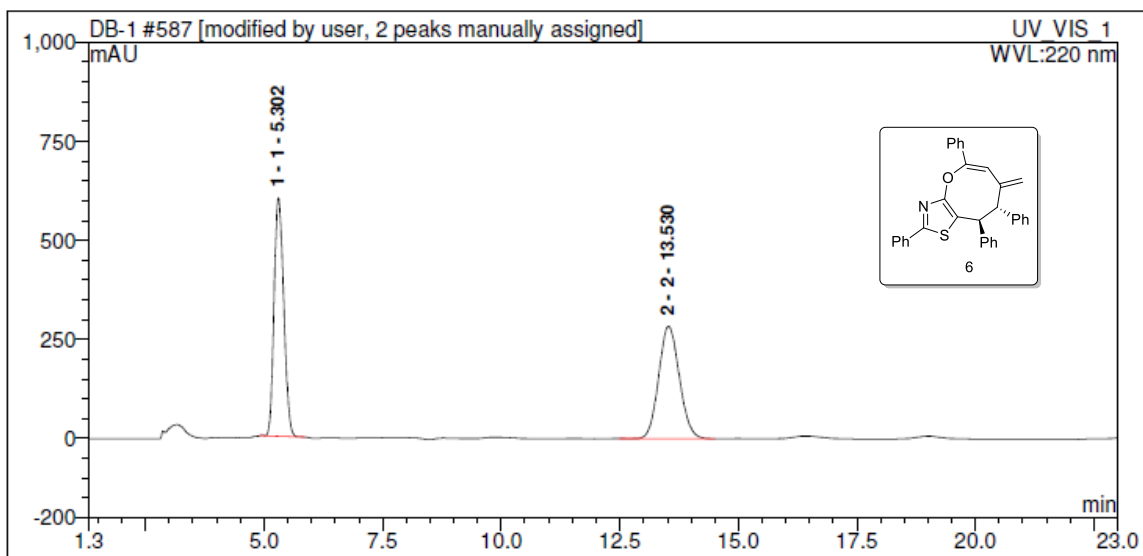

| No. | Peak Name | Ret.Time (detected)<br>min | Area<br>mAU*min | Rel.Area(ident.)<br>% | Height<br>mAU | Amount |
|-----|-----------|----------------------------|-----------------|-----------------------|---------------|--------|
| 1   | 1         | 5.30166667                 | 142.1706        | 49.75200346           | 602.4125      | n.a.   |
| 2   | 2         | 13.53                      | 143.5879        | 50.24799654           | 283.7144      | n.a.   |

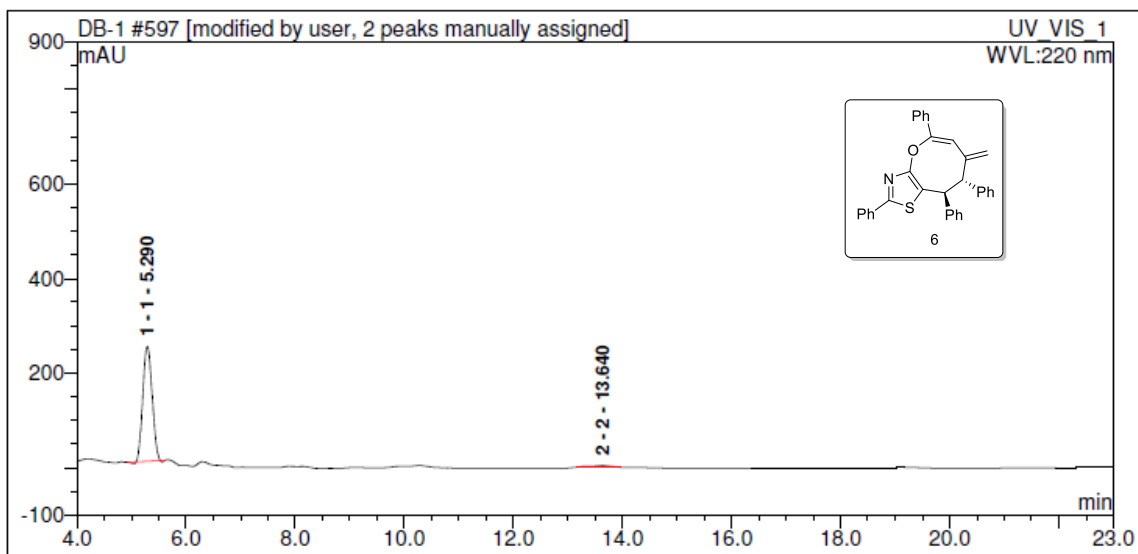

| No. | Peak Name | Ret.Time (detected)<br>min | Area<br>mAU*min | Rel.Area(ident.)<br>% | Height<br>mAU | Amount |
|-----|-----------|----------------------------|-----------------|-----------------------|---------------|--------|
| 1   | 1         | 5.29                       | 47.93964        | 96.93104678           | 242.1977      | n.a.   |
| 2   | 2         | 13.64                      | 1.517827        | 3.068953224           | 3.11702       | n.a.   |
